# Supplementary material for: RNA N6-methyladenosine modulates endothelial atherogenic responses to disturbed flow in mice
Source: eLife journal article supplement (doi:10.7554/elife.69906), 2022-01-10
Supplement: supp [file Figure 1-figure supplement 1-source data 1.xlsx]

## Sheet: Fig S1B
		TA						AA
	METTL3	1.34138	0.931148	0.727473	1.45083	0.822987	0.726179	0.078445	0.154459	0.35146	0.442189	0.207333	0.245506
	METTL14	1.50066	0.729528	0.769812	1.33041	1.06841	0.60118	1.05323	0.419453	0.582975	0.597088	0.691834	1.0436
	WTAP	1.02223	0.866627	1.11115	1.09359	0.972579	0.933831	0.945007	0.95467	1.08047	0.722597	0.85147	0.692519
	Virillizer	1.00877	1.04884	0.942394	1.01588	1.22918	0.754942	0.30864	0.377974	0.867053	0.368913	0.718818	0.500761

## Sheet: Fig S1F
		RCA	LCA-1wk	LCA-2wk
	METTL3	1.18288	0.3133	0.336605
		1.26031	0.321088	0.562948
		0.807622	0.236659	0.180012
		1.03141	0.592567	0.430268
		0.858888	0.251317	0.184857
		0.858888	0.295427	0.296979
