# Supplementary material for: RNA N6-methyladenosine modulates endothelial atherogenic responses to disturbed flow in mice
Source: eLife journal article supplement (doi:10.7554/elife.69906), 2022-01-10
Supplement: supp [file Figure 1-source data 1.xlsx]

## Sheet: Fig 1A
		m6A/A	ST	OS
			0.982421	0.855339
			1.06309	0.839477
			0.95449	0.793466

## Sheet: Fig 1C
		ST						OS
	METTL3	0.998683	1.02483	0.976491	0.966445	0.934814	1.09874	0.491765	0.495445	0.547358	0.158601	0.46482	0.53543
	METTL14	1.12775	1.04078	0.831472	0.991957	0.859701	1.14834	0.875807	1.13837	1.17408	1.20972	1.29549	1.10574
	METTL16	0.657389	1.14828	1.19433	0.697436	1.01011	1.29245	0.813654	0.895591	1.01723	0.777037	0.570983	0.712756
	WTAP	0.916626	0.8461	1.23727	1.06475	0.89091	1.04435	1.12259	0.85885	0.852875	0.987307	1.00039	0.909284
	virillizer	0.849815	1.0667	1.08348	0.692787	0.974232	1.33298	0.544485	0.612656	0.723665	0.65011	0.430011	0.51634

## Sheet: Fig 1E
		ST						OS
	METTL3	0.490054	1.1069	1.40304	0.78	0.983	1.24	0.605267	0.017637	0.162974	1.06	0.528	0.279
	METTL14	0.806524	1.01787	1.1756	1.28266	0.988933	0.728408	1.17237	1.14256	0.649683	1.43189	1.00048	0.724567
	METTL16	0.624492	1.19345	1.18206	0.93523	1.065	0.999772	1.3911	0.972983	0.798424	1.67497	1.06898	0.853228
	WTAP	0.833712	0.996747	1.16954	0.801062	0.921253	1.27768	0.805879	0.949197	0.68708	1.28205	1.15342	0.935337
	virillizer	0.747627	0.872123	1.38025	0.73084	0.68839	1.58077	0.774608	0.381286	0.609225	0.044037	0.094252	0.453048

## Sheet: Fig 1G
			AA inner	AA outer	TA
			38.3709	62.1394	51.6903
			24.3222	68.9707	54.4188
			19.2336	61.5182	68.0742
			33.2789	65.3752	62.2156
			26.0778	69.1165	63.8973
			18.2981	70.0516	52.5221
