# Supplementary material for: RNA N6-methyladenosine modulates endothelial atherogenic responses to disturbed flow in mice
Source: eLife journal article supplement (doi:10.7554/elife.69906), 2022-01-10
Supplement: supp [file Figure 2-figure supplement 1-source data 1.xlsx]

## Sheet: Fig S2B
		Mettl3flox/flox	EC-Mettl3KO
	Weight	26.2	29.2
		27	27.3
		27.6	23.6
		28	26.3
		29	28

## Sheet: Fig S2D
		AAV9-Ctrl					AAV9-METTL3 OE
METTL3	RCA	1.16264	0.853102	1.06408	1.00912	0.911057	2.67396	3.12365	3.33434	3.29795	3.09752
	LCA	0.300968	0.246322	0.426518	0.324021	0.474824	3.10776	3.11154	3.36418	3.142	3.11684
