# Supplementary material for: RNA N6-methyladenosine modulates endothelial atherogenic responses to disturbed flow in mice
Source: eLife journal article supplement (doi:10.7554/elife.69906), 2022-01-10
Supplement: supp [file Figure 2-source data 1.xlsx]

## Sheet: Fig 2B
			TA			AA
	METTL3	Mettll3flox/flox	1.1696	0.807057	1.02335	0.55491	0.315891	0.295057
		EC-Mettll3KO	0.037346	0.054046	0.052625	0.002409	0.003318	0.029751

## Sheet: Fig 2C
			TA			AA
	VCAM-1	Mettll3flox/flox	1.35034	0.625573	1.02409	2.23334	2.28364	2.69933
		EC-Mettll3KO	1.4946	2.21576	2.24212	3.10974	2.64778	2.6893

## Sheet: Fig 2E
		RCA-Mettl3flox/flox						LCA-2wk-Mettl3flox/flox						RCA-2wk-EC-Mettl3KO						LCA-2wk-EC-Mettl3KO
	VCAM-1	0.92256	1.08723	1.13602	1.01524	0.848838	0.990112	2.28395	2.35073	2.03824	1.78491	1.80299	2.0301	4.05238	3.93112	3.73701	3.28581	3.60238	3.91379	5.22337	4.3236	4.75383	5.22871	5.24671	5.37933
	Mettl3	1.04473	1.17834	1.22177	0.778795	0.784581	0.991784	0.458143	0.40752	0.494284	0.499102	0.537627	0.429561	0.282173	0.311722	0.221323	0.190842	0.247988	0.244635	0.294737	0.170512	0.182258	0.218815	0.267361	0.191336

## Sheet: Fig 2G
		RCA	LCA-AAV9-Ctrl	LCA-AAV9-METTL3 OE
	VCAM-1	1.0171	5.69931	3.2058
		0.932562	4.04711	2.45528
		1.39778	9.61546	0.446181
		0.406543	7.27211	1.68679
		1.24601	6.49542	2.45608
