# Supplementary material for: RNA N6-methyladenosine modulates endothelial atherogenic responses to disturbed flow in mice
Source: eLife journal article supplement (doi:10.7554/elife.69906), 2022-01-10
Supplement: supp [file Figure 3-source data 1.xlsx]

## Sheet: Fig 3-D
		ST	OS
	EGFR	1.23695	5.45202
		1.04854	5.33982
		1.03126	4.84599
		1.44007	7.38208
		0.401531	4.0243
		1.0786	4.18039

## Sheet: Fig 3-E
			ST	OS
		EGFR	1.06033	0.005921
			1.23115	0.002755
			0.708522	0.021796
			0.899831	0.01731
			1.10017	0.182722

## Sheet: Fig 3-F
		Ad-GFP						Ad-Mettl3
EGFR	0h	0.860848	0.683021	1.45613	1.0353	1.10514	0.85956	0.871299	0.271306	1.8574	0.765063	0.550974	1.68396
	4h	0.644187	0.553098	0.779925	0.413018	0.442277	0.846458	0.293147	0.407524	0.25844	0.389863	0.279788	0.286445
	6h	0.505594	0.45599	0.327494	0.565079	0.439847	0.557795	0.378486	0.275958	0.277476	0.217277	0.277544	0.205041

## Sheet: Fig 3-G
				si-NC						si-Mettl3
		EGFR	0h	1.10807	1.03023	0.968958	0.68012	0.825261	1.38736	0.957425	1.0229	0.949602	0.906666	1.0756	1.0878
			4h	0.599129	0.661538	0.842193	0.284719	0.868145	0.357963	0.940572	0.62103	0.876117	1.01156	0.644457	1.02443
			6h	0.285797	0.687807	0.43276	0.19231	0.549125	0.711192	0.767857	0.712932	0.874839	0.863682	0.743632	0.586951

## Sheet: Fig 3-H
				ST						OS
		EGFR	0h	0.697769	0.976682	0.50998	0.685271	1.70677	1.42353	1.72828	0.685368	1.12377	1.2465	0.417256	0.798821
			4h	0.868547	0.66799	0.95221	0.538457	0.845819	0.840932	0.957248	0.958691	0.64699	0.442863	1.0621	1.05889
			6h	0.750783	0.402984	0.571085	0.3568	0.329277	0.465784	0.785933	0.799792	0.845376	0.958377	0.743869	0.985724

## Sheet: Fig 3-J
			Ad-GFP								Ad-Mettl3
		WT	1.00622	1.19889	0.99399	0.837997	1.36837	1.03409	0.628044	0.969495	0.026308	0.111114	0.330556	0.274845	0.308126	0.595745	0.295309	0.530633
		MUT	0.898515	0.970232	1.13125	1	1.08759	0.912412	0.918616	1.08138	0.815554	0.937941	0.90839	0.895598	0.852419	0.857223	0.843779	0.372311
