# Supplementary material for: RNA N6-methyladenosine modulates endothelial atherogenic responses to disturbed flow in mice
Source: eLife journal article supplement (doi:10.7554/elife.69906), 2022-01-10
Supplement: supp [file Figure 4-figure supplement 1-source data 1.xlsx]

## Sheet: Fig S4A
				ST						OS
		VCAM-1	Ad-GFP	1	1	1	0.783467	1.06051	1.15603	4.1508	3.78919	3.5996	4.86271	5.0433	5.92551
			Ad-Mettl3	0.87777	0.925868	0.727543	0.49946	0.264949	0.494568	2.61306	2.05685	1.46164	0.448435	1.51141	2.37597

## Sheet: Fig S4B
			ST	OS
		TSP-1	1.10026	3.12263
			1.05764	3.86413
			0.842107	4.82942
			1.1531	1.82675
			1.17165	1.81285
			0.67525	2.12224
			ST	OS
		THBS-1	1.05255	2.09056
			0.728947	2.22512
			1.07466	1.2604
			1.14384	3.79444
			1.32917	2.07129
			0.841204	2.18939

## Sheet: Fig S4D
			ST						OS
	THP-1	Ad-GFP	0.893004	1.21811	1.18827	0.799383	1.08313	0.818107	3.31852	2.51029	3.16049	2.60905	3.78327	2.91907
		Ad-Mettl3	0.279835	0.436214	0.477366	0.502058	0.271605	0.556927	1.2963	1.25309	1.03704	1.64197	1.49794	1.09465
