# Supplementary material for: RNA N6-methyladenosine modulates endothelial atherogenic responses to disturbed flow in mice
Source: eLife journal article supplement (doi:10.7554/elife.69906), 2022-01-10
Supplement: supp [file Figure 4-source data 1.xlsx]

## Sheet: Fig4B
		ST						OS
p-EGFR/EGFR	Ad-GFP	0.845747	1.01357	1.06125	1.00957	1	1.06986	0.673466	0.625579	0.850429	0.695487	0.788494	0.979503
	Ad-Mettl3	1.31076	0.444679	0.642859	1.04982	0.848304	0.900583	1.67485	1.11042	0.727674	0.601185	0.855532	0.643523
		ST						OS
EGFR	Ad-GFP	1.31646	0.726235	0.957305	0.85816	1.24751	0.894325	4.36909	4.45902	5.62257	4.63951	3.3319	2.52016
	Ad-Mettl3	0.818512	2.24021	1.44868	0.987174	1.31422	0.766356	0.750808	1.33014	0.969205	1.13466	1.49631	0.929033
		ST						OS
p-AKT/AKT	Ad-GFP	1	1.10273	0.897274	0.945033	1	1.05497	3.21037	5.26392	3.17493	3.78996	4.11854	1.43598
	Ad-Mettl3	0.368111	0.760667	0.723779	1.96128	1.33045	0.772055	0.41937	0.500142	0.371564	0.969638	1.12296	1.10383
		ST						OS
p-ERK/ERK	Ad-GFP	1.20239	0.875041	0.922573	0.934038	1.0413	1.02466	2.04023	1.467	1.90208	1.60373	0.966206	2.46567
	Ad-Mettl3	0.540404	0.46004	0.505182	0.309999	0.033175	0.316176	0.637654	0.530595	0.501064	0.772105	0.062403	0.158415

## Sheet: Fig 4D
		Ctrl						TSP-1
p-EGFR/EGFR	Ad-GFP	1.4465	0.766246	0.787257	1	0.867925	1.13207	3.7302	2.1797	2.71368	2.66623	2.0337	2.53175
	Ad-Mettl3	0.337338	1.45408	1.47476	0.924603	0.685282	2.46085	0.313035	0.33961	0.708984	0.731734	1.47136	2.21138
		Ctrl						TSP-1
EGFR	Ad-GFP	1.03836	0.963021	0.998615	1	0.928586	1.07141	1.01984	1.1134	1.05732	1.05877	1.16225	1.56159
	Ad-Mettl3	0.408423	0.459591	0.301983	0.849389	0.578573	0.292086	0.4375	0.3712	0.483814	0.56627	0.687886	0.545523

## Sheet: Fig 4F
		ST									OS
p-EGFR/EGFR	Ctrl	1	0.923726	0.910485	1.07293	1	1.09286	1	1	1	1.44553	1.00246	1.09515	0.634158	0.409106	0.782074	0.796997	0.996556	1.00904
	AG	1.4148	0.551492	0.970659	0.930606	0.288202	0.586641	0.657525	1.04554	1.30949	0.063981	0.423628	0.099583	0.006607	0.107626	0.151441	0.075342	0.061632	0.29328
		ST									OS
EGFR	Ctrl	1	1	1	1.2997	0.700303	1	0.8767	1	1	2.45539	2.10333	2.28174	4.06123	3.19376	1.94467	4.21261	5.61758	5.61758
	AG	0.981084	0.898066	0.558577	0.355891	1.18275	0.371967	1.30828	1.1957	1.1957	1.37191	1.50144	1.62578	3.06081	2.47611	1.50984	6.62659	4.78453	4.78453
		ST									OS
p-AKT/AKT	Ctrl	1	1	0.938328	1.07299	0.988682	1	1	1.10371	0.896293	2.53697	2.79752	1.97973	1.78583	1.45802	2.38405	1.90695	1.72591	2.05631
	AG	0.050399	1.55881	0.493966	1.03266	0.246223	1.55975	0.308898	0.454263	0.567386	1.13912	0.842931	1.11236	0.779972	0.178312	1.28316	1.35999	0.913386	1.19944
		ST									OS
p-ERK/ERK	Ctrl	1.06525	0.84902	1.08573	1.16639	0.833615	1	0.966995	1	1.033	3.0886	3.18931	1.72784	2.06796	1.85271	1.84583	6.18764	2.88439	2.08411
	AG	1.76352	1.05369	1.1142	1.28546	0.872659	0.606815	0.089575	0.447529	0.301543	0.393109	0.383413	1.58142	0.440786	0.176962	0.763822	3.51336	1.44743	0.885082
		ST									OS
VCAM-1	Ctrl	0.921226	1.07877	0.898137	1.10186	1.15823	0.841774	1.16557	0.834428	1	4.97145	4.46658	5.9245	7.54279	3.34841	3.27887	4.33746	4.39476	2.11527
	AG	1.08233	0.498877	0.692694	1.06203	1.57124	0.951949	0.712054	0.368243	0.198182	1.38557	2.17844	1.68818	2.34652	0.524882	0.701117	1.89349	0.661264	1.78185
		ST						OS
THP-1	Ctrl	1.21588	0.889972	0.814763	1.12813	0.739554	1.2117	3.02925	2.37117	3.47841	2.62187	3.4993	3.2501
	AG	0.864903	0.589136	0.889972	0.864903	1.49164	1.19976	1.66086	2.19359	2.19359	1.91783	1.48851	1.85933

## Sheet: Fig 4H
		si NC									si Mettl3
p-EGFR/EGFR	Ctrl	1.00193	0.814818	0.942536	1.02553	1.23131	0.983877	1.06371	1	0.93629	1.10675	0.870652	1.14342	1.04094	1.08495	1.02662	0.793081	1.02082	1.27539
	AG	0.966511	0.852143	1.66747	0.946636	0.775533	0.85153	0.455873	1.00413	0.672144	0.225772	0.368758	0.455898	0.297071	0.255595	0.714626	0.367705	0.569421	0.639886
		si NC									si Mettl3
EGFR	Ctrl	0.984581	1.10435	0.911069	0.701056	1.171	1.12794	1	0.867473	1.13253	2.26123	2.05315	1.3195	1.52236	1.92145	2.23932	3.32958	1.78472	2.25519
	AG	1.01117	0.85548	0.525618	0.875232	1.05552	1.04464	1.34403	0.610213	0.717398	2.69696	1.57388	1.45666	1.91611	2.18392	1.45183	2.6381	1.07974	1.79637
		si NC									si Mettl3
p-AKT/AKT	Ctrl	0.92232	0.870365	1.20731	1.31429	0.800917	0.88479	1.21539	0.722241	1.06237	1.9715	2.18914	2.16594	2.93507	1.91697	1.53182	2.90333	1.38688	1.51456
	AG	0.985911	0.423621	1.13245	0.580792	1.38305	0.349642	0.411507	0.437458	0.244934	0.856755	0.523764	0.833553	1.11699	1.05388	0.246677	1.26534	0.87574	0.557814
		si NC									si Mettl3
p-ERK/ERK	Ctrl	1.05513	0.975809	0.969063	1	1.16017	0.839833	1.34124	0.658763	1	3.22017	3.03066	3.1197	1.78982	1.84306	1.5975	3.95985	3.20721	3.38741
	AG	1.69869	1.42086	0.911774	0.919988	1.01265	0.888889	1.67229	1.0817	1.31431	0.963794	0.87516	1.58932	0.772448	0.641996	0.792281	2.18096	2.24608	1.47758
		si NC									si Mettl3
VCAM-1	Ctrl	1.17703	1	0.822968	0.905532	1.26773	0.82674	0.624195	1.21092	1.16488	2.0877	2.81947	2.09709	2.34583	2.3184	1.63111	2.74996	2.04859	2.18049
	AG	0.210519	1.11261	0.331541	1.03696	0.547704	0.656285	0.841335	0.411782	0.398461	0.03217	1.53081	0.518743	0.410148	1.42363	0.922371	1.2096	1.6244	0.813201
		si NC						si Mettl3
THP-1	Ctrl	0.884956	0.840708	0.973451	1.19469	1.26549	0.840708	1.26106	1.89528	1.69616	1.20206	1.74779	1.90265
	AG	0.884956	1.06195	0.725664	0.699115	0.707965	0.929204	0.877581	0.619469	0.685841	1.26106	0.764855	0.707965
