# Supplementary material for: RNA N6-methyladenosine modulates endothelial atherogenic responses to disturbed flow in mice
Source: eLife journal article supplement (doi:10.7554/elife.69906), 2022-01-10
Supplement: supp [file Figure 5-figure supplement 1-source data 1.xlsx]

## Sheet: Fig S5B
			RCA	LCA	LCA
		METTL3	0.961006	0.56118	0.052072
			1.0403	0.501335	0.044563
			0.977768	0.467374	0.092681
			1.02206	0.450798	0.046945
			0.998868	0.358198	0.072247

## Sheet: Fig S5D
		ApoE-/-Mettl3flox/flox	ApoE-/-EC-Mettl3KO
	Weight	30.9	27.6
		30.3	27.8
		31.4	29.1
		26.6	29.6
		27.1	31.7

## Sheet: Fig S5E
			ApoE-/-Mettl3flox/flox				ApoE-/-EC-Mettl3KO
		TG	59.8007	75.7939	60.4961	89.7011	80.6614	70.2311	84.8336	66.0589
		CHO	505.394	363.159	681.541	667.054	779.986	397.401	634.459	278.872
		LDL-C	215.058	153.168	321.029	312.124	250.234	166.525	256.467	108.642
		HDL-C	100.571	118.857	123.429	132.571	118.857	82.2857	105.143	137.143
