# Supplementary material for: RNA N6-methyladenosine modulates endothelial atherogenic responses to disturbed flow in mice
Source: eLife journal article supplement (doi:10.7554/elife.69906), 2022-01-10
Supplement: supp [file Figure 5-source data 1.xlsx]

## Sheet: Fig 5C
	EGFR	RCA	AM	AEM	AEM+AAV
		1.17529	2.82849	7.11669	2.36339
		1.25833	2.42453	8.61778	1.9356
		0.945419	2.29863	10.5836	1.9455
		0.965405	3.31467	5.81783	2.01576
		0.655557	2.51657	6.82346	1.59598

## Sheet: Fig 5D
		TSP-1	RCA	AM	AEM	AEM+AAV
			1.10181	3.33113	4.15519	6.25458
			0.634817	5.8485	3.60828	4.80312
			0.705592	5.44436	5.01874	3.38491
			1.4019	6.44301	5.97079	2.87868
			1.15588	5.44926	5.63244	4.50632

## Sheet: Fig 5F
		Apoe-/- Mettl3f/f					Apoe-/- EC-Mettl3KO
HE	2wk	9.98956	22.5224	15.4294	21.679	22.245	44.1993	41.8646	58.4907	30.0749	33.8251
	4wk	39.2355	38.0847	38.9471	56.2103	55.7871	52.5749	74.4856	71.0885	70.8123	74.2382
