# Supplementary material for: RNA N6-methyladenosine modulates endothelial atherogenic responses to disturbed flow in mice
Source: eLife journal article supplement (doi:10.7554/elife.69906), 2022-01-10
Supplement: supp [file Figure 6-source data 1.xlsx]

## Sheet: Fig 6B
			ApoE-/-Mettl3flox/flox										ApoE-/-EC-Mettl3KO
		Aorta	5.89006	10.1318	7.32212	8.73645	4.98247	7.48509	10.3024	2.85208	6.68417	5.48992	13.3233	20.4885	12.5611	12.837	15.6083	14.3817	15.5566	11.3351	28.5331	20.0106
		AA	6.87345	15.4252	14.7612	10.3968	12.3082	11.8006	18.8569	7.28692	13.2642	3.99948	14.004	27.8565	22.3426	28.8076	26.1224	23.7526	19.1559	24.7972	33.4074	21.7264
		TA	5.30726	6.10064	2.73622	7.61429	0.910174	5.3088	4.61102	0.075089	2.83964	6.20228	12.8529	16.2651	5.51496	3.12833	9.19099	8.50001	12.8888	6.06845	3.95012	18.8367

## Sheet: Fig 6D
				ApoE-/-Mettl3flox/flox	ApoE-/-EC-Mettl3KO
			HE	22.4064	27.1263
				21.5566	23.3778
				10.9731	40.5843
				18.8806	28.0053
				33.581	18.0147
				24.0571	34.0344
				18.4073	32.9233
				27.7504	46.8213
				ApoE-/-Mettl3flox/flox	ApoE-/-EC-Mettl3KO
			ORO	16.1538	24.6625
				23.8363	30.0241
				17.4478	35.9381
				15.1464	27.3615
				28.5692	11.7567
				23.959	35.6663
				16.184	28.071
				22.7107	28.1606
				ApoE-/-Mettl3flox/flox	ApoE-/-EC-Mettl3KO
			ORO	6.66702	8.75664
				7.79523	8.13425
				10.6647	9.85427
				11.0211	6.5181
				9.58915	5.87394
				8.31216	8.69094
				9.1654	8.76039
				14.5842	14.0298

## Sheet: Fig 6F
				ApoE-/-Mettl3flox/flox	ApoE-/-EC-Mettl3KO
			VCAM-1	0.882135	2.6354
				0.880697	1.89636
				0.946595	1.86871
				1.32347	1.49954
				0.967098	1.44146
				ApoE-/-Mettl3flox/flox	ApoE-/-EC-Mettl3KO
			EGFR	1.05784	2.8487
				1.17447	2.4474
				1.11827	2.98581
				0.580817	2.1691
				1.0686	2.58652

## Sheet: Fig 6H
			ApoE-/-Mettl3flox/flox	ApoE-/-EC-Mettl3KO
		aSMA	5.41532	5.60842
			6.13208	5.62784
			4.49014	5.65522
			6.22909	5.86477
			6.90056	9.80354
			ApoE-/-Mettl3flox/flox	ApoE-/-EC-Mettl3KO
		CD68	22.9649	36.2922
			8.42144	35.754
			8.56847	22.418
			10.9572	15.1938
			22.325	27.9048
