# Supplementary material for: RNA N6-methyladenosine modulates endothelial atherogenic responses to disturbed flow in mice
Source: eLife journal article supplement (doi:10.7554/elife.69906), 2022-01-10
Supplement: supp [file Figure 7-figure supplement 1-source data 1.xlsx]

## Sheet: Fig S7-B
		shCtrl	Apoe-/-Mettl3flox/flox+sh Ctrl	Apoe-/-Mettl3flox/flox+sh THBS1	Apoe-/-EC-Mettl3KO+sh Ctrl	Apoe-/-EC-Mettl3KO+shTHBS1
	TSP-1	1.01691	1.9647	0.483147	2.02227	0.591182
		1.03779	2.64468	0.503875	1.96224	0.542557
		0.764832	2.61559	0.36186	2.83861	0.595727
		1.03697	2.62148	0.466982	2.38413	0.306132
		0.961222	2.40444	0.503335	1.95976	0.062147
		1.18229	2.87183	0.447335	2.45505	0.769947

## Sheet: Fig S7-E
		RCA	AM-Ctrl	AM-AG	AEM-Ctrl	AEM-AG
	p-EGFR	1.20411	3.84619	1.55944	4.4127	0.905912
		1.15789	3.37219	1.17075	4.92264	0.887322
		0.897866	4.25415	0.82675	4.85054	0.756811
		0.942703	3.92213	0.718697	5.18036	0.800068
		0.840234	3.82377	0.800107	4.5143	0.428124
		0.957192	3.89377	1.0195	4.49206	0.782775
		RCA	AM-Ctrl	AM-AG	AEM-Ctrl	AEM-AG
	EGFR	1.1229	4.10554	3.69929	6.00019	5.78334
		0.900169	3.55237	3.32673	5.08573	5.87738
		0.887829	3.7649	3.31175	5.64948	5.92871
		0.991226	3.90156	3.42652	5.93907	5.50064
		1.04225	4.32939	5.146	5.90721	4.95434
		1.05563	4.06307	5.08488	5.8517	5.64345

## Sheet: Fig S7-F
			ApoE-/-Mettl3flox/flox+AG						ApoE-/-EC-Mettl3KO+AG
		TG	106.287	75.1525	62.2692	60.122	55.8275	83.7413	55.8275	66.5636	81.5941	56.9012	91.2566	50.4595
		CHO	480.241	741.393	553.393	767.728	712.132	717.984	399.774	724.568	723.105	584.848	698.965	449.517
		LDL-C	570.308	422.404	257.788	335.5	180.075	288.705	533.541	439.116	320.459	454.993	226.87	278.678
		HDL-C	55.7419	80.5161	55.7419	92.9032	68.129	68.129	80.5161	68.129	30.9677	130.065	105.29	68.129
