# Supplementary material for: RNA N6-methyladenosine modulates endothelial atherogenic responses to disturbed flow in mice
Source: eLife journal article supplement (doi:10.7554/elife.69906), 2022-01-10
Supplement: supp [file Figure 7-source data 1.xlsx]

## Sheet: Fig 7B
		Mettl3f/f Apoe-/-					EC-Mettl3KOApoe-/-
HE	sh Ctrl	20.017	29.2435	23.2977	16.7264	29.2172	53.1874	48.0665	45.4584	44.334	48.2833
	shTHBS1	8.03397	9.43904	13.4951	10.4974	12.0896	30.946	23.1906	26.1315	22.6106	26.0395
	AG1478	5.54786	4.97832	5.7578	8.07132	10.5548	14.6318	16.8637	23.1491	6.77326	27.1335

## Sheet: Fig 7D
				Mettl3f/f Apoe-/-						EC-Mettl3KOApoe-/-
		VCAM-1	sh Ctrl	1.2296	0.887943	0.9643	1.01828	1.01723	0.882654	1.88344	2.35066	2.21869	2.15497	2.26463	1.97091
			sh THBS1	0.385688	0.545291	0.263391	0.434747	0.350877	0.362436	1.38565	0.948859	1.25944	1.07703	1.11818	1.2848
			AG1478	0.611482	0.671114	0.565485	0.682217	0.440829	0.561945	1.32706	1.38112	1.48941	1.30899	0.738003	1.00529
