# Supplementary material for: RNA N6-methyladenosine modulates endothelial atherogenic responses to disturbed flow in mice
Source: eLife. 2022 Jan 10;11:e69906. doi: 10.7554/eLife.69906 (PMC8794471; doi:10.7554/eLife.69906)
Supplement: Supplementary file 1. [file elife-69906-supp1.xlsx]

## Sheet: Table S1 m6A peak in ST
Supplemental Table 1. Identified m6A peaks in ST
Chromosome	Chr_start	Chr_stop	Strand	GeneID	enrichment
chr1	135112	135372	-	ENSG00000237683	10.264
chr1	138152	138597	-	ENSG00000237683	8.69627
chr1	138921	139560	-	ENSG00000237683	3.81923
chr1	910573	910805	-	ENSG00000187642	2.81401
chr1	949421	949641	+	ENSG00000187608	1.68923
chr1	989927	991227	+	ENSG00000188157	12.4407
chr1	1152386	1153024	-	ENSG00000078808	4.1784
chr1	1167967	1170382	+	ENSG00000176022	27.318
chr1	1190298	1190938	-	ENSG00000160087	14.8806
chr1	1228075	1228345	-	ENSG00000131584	1.7601
chr1	1244407	1244606	+	ENSG00000169972	1.99873
chr1	1262704	1264223	+	ENSG00000224051	34.4587
chr1	1271199	1271812	-	ENSG00000107404	4.00177
chr1	1290856	1291296	-	ENSG00000162576	7.1522
chr1	1322065	1323249	-	ENSG00000221978	15.5616
chr1	1374314	1374856	+	ENSG00000179403	8.21885
chr1	1375122	1375896	+	ENSG00000179403	12.651
chr1	1510504	1511042	+	ENSG00000215014	6.93736
chr1	1533446	1535065	-	ENSG00000228594	15.027
chr1	1558669	1559104	+	ENSG00000197530	3.72988
chr1	1580513	1580784	-	ENSG00000248333	12.0299
chr1	1593298	1593552	-	ENSG00000189339	1.8849
chr1	1594503	1595189	-	ENSG00000189339	7.43913
chr1	1596370	1597462	-	ENSG00000189339	49.8438
chr1	1622549	1622831	-	ENSG00000189339	9.33094
chr1	1675680	1675940	-	ENSG00000215790	5.77182
chr1	1677165	1677380	-	ENSG00000215790	3.20393
chr1	1682717	1683314	-	ENSG00000008130	11.1677
chr1	2121566	2122822	+	ENSG00000269554	12.3787
chr1	2143210	2144187	-	ENSG00000203301	13.3295
chr1	2160468	2161226	+	ENSG00000157933	8.00769
chr1	2238119	2239947	+	ENSG00000157933	15.1246
chr1	2334444	2335035	+	ENSG00000157916	3.59172
chr1	2336599	2337196	-	ENSG00000157911	3.26765
chr1	2435786	2436340	+	ENSG00000149527	3.30628
chr1	2494495	2495251	+	ENSG00000157873	10.4586
chr1	3379655	3380292	+	ENSG00000130762	16.1209
chr1	3545176	3545512	+	ENSG00000158109	2.75004
chr1	3546384	3546616	+	ENSG00000158109	1.76545
chr1	3703316	3703897	-	ENSG00000130764	4.26166
chr1	3712249	3712710	-	ENSG00000130764	3.00837
chr1	3731476	3732055	-	ENSG00000116198	3.4461
chr1	3801612	3801837	+	ENSG00000169598	2.83561
chr1	3807168	3807565	-	ENSG00000198912	7.35676
chr1	5922989	5923420	-	ENSG00000131697	5.55324
chr1	6052555	6052989	+	ENSG00000069424	3.55661
chr1	6158572	6158876	+	ENSG00000069424	7.67028
chr1	6159445	6159738	+	ENSG00000069424	2.66591
chr1	6164975	6165178	-	ENSG00000116254	3.65001
chr1	6283738	6284109	-	ENSG00000116237	4.15775
chr1	6284604	6285412	-	ENSG00000116237	27.9804
chr1	6308917	6309617	-	ENSG00000158292	19.0549
chr1	6521306	6521696	-	ENSG00000215788	10.0637
chr1	6526981	6527185	-	ENSG00000171680	2.00701
chr1	6584408	6584889	-	ENSG00000162408	17.9109
chr1	6585469	6585890	-	ENSG00000162408	2.47349
chr1	6640554	6641331	+	ENSG00000204859	14.2573
chr1	6649054	6649294	+	ENSG00000204859	4.00058
chr1	6652648	6653908	-	ENSG00000162413	23.1483
chr1	6658922	6659633	-	ENSG00000162413	29.9428
chr1	6661662	6662796	-	ENSG00000162413	12.0337
chr1	6679879	6680577	+	ENSG00000116273	9.41785
chr1	6681310	6682135	+	ENSG00000116273	22.1814
chr1	6694496	6695609	-	ENSG00000007923	4.36476
chr1	7826476	7826900	+	ENSG00000171735	4.28923
chr1	7840974	7841318	+	ENSG00000049245	1.35935
chr1	7887221	7887632	+	ENSG00000049246	8.76864
chr1	8073204	8074466	-	ENSG00000116285	11.8543
chr1	8390395	8391046	+	ENSG00000162426	17.7987
chr1	8404007	8404206	+	ENSG00000162426	2.37667
chr1	8418191	8419050	-	ENSG00000142599	10.1155
chr1	8421127	8421881	-	ENSG00000142599	11.7672
chr1	8716030	8716488	-	ENSG00000142599	6.09894
chr1	9163794	9164709	-	ENSG00000180758	7.94002
chr1	9294857	9295322	+	ENSG00000049239	29.0747
chr1	9304872	9305703	+	ENSG00000049239	28.4915
chr1	9322125	9322516	+	ENSG00000049239	2.2098
chr1	9323354	9325535	+	ENSG00000049239	9.86106
chr1	9328857	9330327	+	ENSG00000049239	14.9346
chr1	9330528	9330975	+	ENSG00000049239	8.16508
chr1	9415760	9416835	+	ENSG00000171621	20.0532
chr1	9427331	9428351	+	ENSG00000171621	35.125
chr1	9672930	9673635	+	ENSG00000188807	14.1465
chr1	9786976	9787531	+	ENSG00000171608	6.68914
chr1	9790266	9790470	-	ENSG00000171603	1.43832
chr1	9990062	9990491	-	ENSG00000162441	3.21784
chr1	10042346	10042963	+	ENSG00000173614	7.98418
chr1	10438135	10439332	+	ENSG00000054523	6.02022
chr1	10479911	10480121	+	ENSG00000142657	1.85158
chr1	10689645	10690237	+	ENSG00000142655	13.7013
chr1	10699563	10700011	-	ENSG00000130940	6.69168
chr1	10713558	10714268	-	ENSG00000130940	11.932
chr1	10719624	10720357	-	ENSG00000130940	4.24143
chr1	11166813	11167514	-	ENSG00000198793	5.87989
chr1	11721877	11722123	+	ENSG00000132879	2.15798
chr1	11779615	11780978	+	ENSG00000162490	17.6417
chr1	11849639	11849840	-	ENSG00000177000	2.23617
chr1	11980038	11980562	-	ENSG00000116685	6.36288
chr1	11982523	11983702	-	ENSG00000116685	8.54533
chr1	11985169	11986145	-	ENSG00000116685	9.7227
chr1	12071533	12072668	+	ENSG00000116688	14.6318
chr1	12267007	12267780	+	ENSG00000028137	8.02657
chr1	12268436	12269275	+	ENSG00000028137	26.6032
chr1	12336067	12338071	+	ENSG00000048707	12.3584
chr1	12342948	12343394	+	ENSG00000048707	5.1489
chr1	12628069	12628416	-	ENSG00000162496	6.24812
chr1	14104971	14106927	+	ENSG00000116731	5.19034
chr1	14107617	14109433	+	ENSG00000116731	8.53864
chr1	15440976	15442193	+	ENSG00000189337	7.79196
chr1	15442567	15444482	+	ENSG00000189337	5.77918
chr1	15819125	15819617	-	ENSG00000132906	5.50338
chr1	15894282	15895542	+	ENSG00000116138	15.8483
chr1	15986422	15988333	+	ENSG00000215695	8.08621
chr1	15986422	15988333	+	ENSG00000197312	8.08621
chr1	16053391	16054496	+	ENSG00000116786	21.3532
chr1	16060559	16060809	+	ENSG00000116786	2.43115
chr1	16066171	16066829	+	ENSG00000162461	2.32168
chr1	16111044	16111393	+	ENSG00000162458	3.71786
chr1	16202503	16203067	+	ENSG00000065526	15.2169
chr1	16254591	16256110	+	ENSG00000065526	10.9862
chr1	16256750	16257288	+	ENSG00000065526	3.0524
chr1	16258725	16259470	+	ENSG00000065526	2.42926
chr1	16259967	16260578	+	ENSG00000065526	1.53388
chr1	16261576	16262214	+	ENSG00000065526	3.97364
chr1	16265842	16266590	+	ENSG00000065526	25.9928
chr1	16268440	16268730	-	ENSG00000116809	2.49244
chr1	16451050	16451756	-	ENSG00000142627	11.6542
chr1	16474808	16475646	-	ENSG00000142627	7.07711
chr1	16577051	16578194	-	ENSG00000037637	19.4644
chr1	16719667	16720148	+	ENSG00000055070	4.04237
chr1	16890286	16890735	-	ENSG00000219481	4.35827
chr1	17734422	17734985	-	ENSG00000179051	7.72519
chr1	19234822	19235117	-	ENSG00000169991	3.64143
chr1	19282889	19283133	-	ENSG00000169991	5.48323
chr1	19585024	19585696	+	ENSG00000053372	11.0983
chr1	19615444	19615647	-	ENSG00000162482	3.46309
chr1	19654913	19655826	+	ENSG00000040487	22.3062
chr1	20008745	20009920	-	ENSG00000162542	19.1801
chr1	20809965	20810312	-	ENSG00000162545	5.13273
chr1	20812427	20812708	-	ENSG00000162545	5.89775
chr1	20826203	20827897	-	ENSG00000090432	24.4315
chr1	20945009	20945258	+	ENSG00000158825	2.86667
chr1	20977097	20977683	+	ENSG00000158828	6.06255
chr1	21133623	21133833	-	ENSG00000075151	1.99665
chr1	21267916	21268721	-	ENSG00000075151	2.71826
chr1	21544325	21545086	-	ENSG00000117298	5.50477
chr1	21545595	21545828	-	ENSG00000117298	1.94397
chr1	21546078	21546682	-	ENSG00000117298	10.9249
chr1	22148725	22149180	-	ENSG00000142798	12.0071
chr1	22446664	22446905	-	ENSG00000162552	2.43334
chr1	22816669	22817001	+	ENSG00000184677	2.74469
chr1	22838182	22838440	+	ENSG00000184677	1.71019
chr1	22852629	22853820	+	ENSG00000184677	9.84283
chr1	22854114	22854878	+	ENSG00000184677	9.19563
chr1	22855115	22856029	+	ENSG00000184677	12.472
chr1	22856713	22857080	+	ENSG00000184677	4.33557
chr1	23110794	23111403	+	ENSG00000133216	15.7298
chr1	23239996	23241394	+	ENSG00000133216	18.6528
chr1	23410610	23411004	-	ENSG00000169641	4.43815
chr1	23414231	23415716	-	ENSG00000169641	15.8401
chr1	23417512	23418338	-	ENSG00000169641	11.294
chr1	23419070	23420652	-	ENSG00000169641	4.58323
chr1	23520163	23520843	-	ENSG00000179546	5.17085
chr1	23636779	23637662	-	ENSG00000125944	12.0792
chr1	23687804	23689673	-	ENSG00000125945	18.0479
chr1	24077566	24078965	+	ENSG00000011007	10.0205
chr1	24085842	24086342	+	ENSG00000011007	8.53885
chr1	24113794	24113999	+	ENSG00000057757	1.61782
chr1	24128495	24128765	-	ENSG00000117305	1.95605
chr1	24171849	24172305	-	ENSG00000179163	2.79364
chr1	24684529	24685138	-	ENSG00000001460	24.5715
chr1	25663464	25664069	-	ENSG00000117616	5.56617
chr1	25687863	25688063	+	ENSG00000183726	1.48669
chr1	25688251	25688552	+	ENSG00000183726	3.42531
chr1	25784775	25785521	+	ENSG00000204178	13.3974
chr1	25824935	25825154	+	ENSG00000204178	3.41985
chr1	25893274	25894304	+	ENSG00000157978	8.29236
chr1	26110163	26110560	+	ENSG00000117643	10.3548
chr1	26142078	26142704	+	ENSG00000162430	7.18911
chr1	26158606	26159040	+	ENSG00000117640	3.63255
chr1	26161519	26162231	-	ENSG00000127423	9.8138
chr1	26189024	26190336	-	ENSG00000182749	15.6542
chr1	26287943	26288630	-	ENSG00000158006	43.2667
chr1	26448291	26449194	+	ENSG00000175087	18.4825
chr1	26449726	26450080	+	ENSG00000175087	3.53425
chr1	26487724	26489097	+	ENSG00000197245	38.8411
chr1	26581797	26582328	+	ENSG00000130695	3.98375
chr1	26795271	26795845	+	ENSG00000117682	12.131
chr1	26900555	26901319	+	ENSG00000117676	11.4525
chr1	27022542	27024069	+	ENSG00000117713	12.9933
chr1	27101112	27101429	+	ENSG00000117713	3.07903
chr1	27105551	27107431	+	ENSG00000117713	30.0449
chr1	27121393	27121851	+	ENSG00000060642	5.58412
chr1	27180234	27180593	+	ENSG00000204160	2.2993
chr1	27216049	27216643	-	ENSG00000142751	3.25698
chr1	27217016	27217496	-	ENSG00000198746	3.99146
chr1	27223663	27224246	-	ENSG00000198746	21.8257
chr1	27226299	27226832	-	ENSG00000198746	4.31179
chr1	27320229	27320463	+	ENSG00000253368	7.43789
chr1	27326316	27326586	+	ENSG00000253368	4.08533
chr1	27331869	27333456	-	ENSG00000158246	10.3417
chr1	27426026	27426308	-	ENSG00000090020	2.51214
chr1	27426624	27426912	-	ENSG00000090020	3.55075
chr1	27681719	27681976	-	ENSG00000142733	2.33258
chr1	27720376	27721017	+	ENSG00000181773	11.8751
chr1	27736376	27736581	-	ENSG00000158195	1.52825
chr1	27877249	27878434	-	ENSG00000126705	17.7972
chr1	28176517	28176925	+	ENSG00000117751	15.0732
chr1	28208699	28209681	+	ENSG00000130775	38.7436
chr1	28212275	28213165	+	ENSG00000130775	15.8316
chr1	28293071	28294163	+	ENSG00000158156	10.8021
chr1	28476126	28476481	-	ENSG00000169403	3.65001
chr1	28607197	28607747	+	ENSG00000130766	4.69988
chr1	28660829	28661493	+	ENSG00000130772	26.8304
chr1	28792927	28793365	+	ENSG00000204138	9.21185
chr1	28799901	28800521	+	ENSG00000204138	3.60387
chr1	28823032	28823408	+	ENSG00000204138	2.53443
chr1	28864324	28865440	+	ENSG00000180198	4.81098
chr1	28921087	28921773	+	ENSG00000188060	3.65001
chr1	28929721	28930075	-	ENSG00000120656	1.95603
chr1	29068941	29070602	+	ENSG00000198492	27.6497
chr1	29313853	29314408	+	ENSG00000159023	18.7637
chr1	29445822	29446192	+	ENSG00000159023	2.08703
chr1	29445822	29446192	-	ENSG00000253304	2.08703
chr1	29519471	29520258	-	ENSG00000116353	11.5695
chr1	31347046	31347552	-	ENSG00000162512	4.72755
chr1	31349261	31349962	-	ENSG00000162512	4.75216
chr1	31532083	31532427	-	ENSG00000134644	2.73061
chr1	32052329	32052923	+	ENSG00000142910	6.25772
chr1	32095668	32096428	-	ENSG00000162517	3.59048
chr1	32192755	32193270	-	ENSG00000121753	22.8126
chr1	32196611	32196847	-	ENSG00000121753	3.32777
chr1	32221763	32222474	-	ENSG00000121753	7.25719
chr1	32479496	32479699	+	ENSG00000121774	2.61974
chr1	32568157	32568371	+	ENSG00000121775	3.27476
chr1	32636370	32636831	+	ENSG00000025800	13.7946
chr1	32641556	32641988	+	ENSG00000025800	7.16686
chr1	32646758	32647144	+	ENSG00000084652	3.06451
chr1	32672737	32673990	+	ENSG00000160051	15.6039
chr1	32799996	32800455	-	ENSG00000175130	5.23634
chr1	32841708	32842327	-	ENSG00000160058	11.9199
chr1	33058537	33059101	+	ENSG00000160062	1.76239
chr1	33058537	33059101	+	ENSG00000254553	1.76239
chr1	33065564	33066248	+	ENSG00000254553	6.03128
chr1	33147068	33147372	-	ENSG00000162520	2.53464
chr1	33160453	33161571	-	ENSG00000162520	17.9505
chr1	33235448	33235948	+	ENSG00000162522	2.10973
chr1	33236793	33237085	+	ENSG00000162522	2.32665
chr1	33241295	33241644	-	ENSG00000134684	2.5395
chr1	33291799	33292505	+	ENSG00000116497	12.3622
chr1	33402238	33402974	-	ENSG00000116514	28.6334
chr1	33611274	33611891	-	ENSG00000116525	1.74385
chr1	33612395	33613181	-	ENSG00000116525	8.33066
chr1	33764692	33765573	+	ENSG00000160094	34.5017
chr1	33944787	33945283	+	ENSG00000121903	11.8039
chr1	33956596	33957432	+	ENSG00000121903	22.4791
chr1	33958686	33959372	+	ENSG00000121903	20.9098
chr1	33959652	33961276	+	ENSG00000121903	9.36372
chr1	35222814	35223337	+	ENSG00000189280	3.95418
chr1	35259824	35261296	+	ENSG00000187513	23.8213
chr1	35370064	35370328	-	ENSG00000116544	4.25834
chr1	35578538	35578946	+	ENSG00000197056	3.74749
chr1	35824582	35825108	+	ENSG00000146463	7.40996
chr1	35884951	35885725	+	ENSG00000146463	5.73383
chr1	35899250	35899666	-	ENSG00000142687	2.89003
chr1	35972215	35972752	-	ENSG00000142687	13.2269
chr1	36025800	36026735	+	ENSG00000020129	12.4315
chr1	36186294	36186643	-	ENSG00000092853	5.0356
chr1	36216766	36217145	-	ENSG00000092853	1.56782
chr1	36225795	36226708	-	ENSG00000092853	11.1963
chr1	36229879	36230376	-	ENSG00000092853	6.2116
chr1	36319076	36319644	+	ENSG00000134698	7.10963
chr1	36321255	36321719	+	ENSG00000134698	8.58924
chr1	36385224	36385551	+	ENSG00000092847	2.6639
chr1	36520547	36520873	+	ENSG00000126070	2.39401
chr1	36521243	36521546	+	ENSG00000126070	10.563
chr1	36558630	36559425	+	ENSG00000116863	8.82393
chr1	36562541	36563516	-	ENSG00000171812	3.99474
chr1	36602482	36603003	-	ENSG00000054116	5.49247
chr1	36754717	36755132	+	ENSG00000054118	3.74343
chr1	36787656	36788188	-	ENSG00000142694	24.1488
chr1	36789269	36789773	-	ENSG00000142694	2.13291
chr1	36789269	36789773	+	ENSG00000116883	2.13291
chr1	36793757	36794645	+	ENSG00000116883	5.36529
chr1	36851246	36851468	-	ENSG00000196182	5.39284
chr1	37941151	37941552	+	ENSG00000163874	3.25283
chr1	37948483	37948936	+	ENSG00000163874	5.34048
chr1	38005576	38006505	-	ENSG00000163877	11.1822
chr1	38077348	38077547	-	ENSG00000169218	1.825
chr1	38265416	38265994	+	ENSG00000185090	3.9603
chr1	38287702	38288299	-	ENSG00000188786	11.8793
chr1	38322889	38323376	-	ENSG00000188786	11.0602
chr1	38455622	38456054	-	ENSG00000183431	3.26062
chr1	39304355	39305374	-	ENSG00000116954	8.151
chr1	39324943	39325404	-	ENSG00000116954	1.94434
chr1	39494338	39494681	+	ENSG00000168653	2.09411
chr1	39797957	39798995	+	ENSG00000127603	5.17601
chr1	39799416	39799647	+	ENSG00000127603	2.06551
chr1	39800215	39800679	+	ENSG00000127603	2.48178
chr1	39801806	39802183	+	ENSG00000127603	3.70248
chr1	39823031	39823521	+	ENSG00000127603	3.87105
chr1	39851102	39851638	+	ENSG00000127603	5.60327
chr1	39852700	39853358	+	ENSG00000127603	2.23453
chr1	39853657	39854416	+	ENSG00000127603	11.3333
chr1	39874698	39878630	+	ENSG00000255103	14.3105
chr1	39879568	39880219	+	ENSG00000255103	6.18608
chr1	40235282	40235689	-	ENSG00000198754	8.82086
chr1	40361344	40363395	-	ENSG00000116990	20.436
chr1	40435262	40435480	+	ENSG00000168389	2.82922
chr1	40701594	40702875	+	ENSG00000117000	11.219
chr1	40703022	40703593	+	ENSG00000117000	1.63198
chr1	40704014	40704913	+	ENSG00000117000	3.32013
chr1	40705711	40706328	+	ENSG00000117000	14.202
chr1	40758091	40758443	+	ENSG00000084073	5.77822
chr1	40916313	40916526	+	ENSG00000187801	2.96212
chr1	40928200	40929102	+	ENSG00000187801	19.2572
chr1	40943452	40943659	+	ENSG00000187815	2.73751
chr1	40960691	40961834	+	ENSG00000187815	7.38363
chr1	40980139	40981523	+	ENSG00000164002	17.6124
chr1	40997247	40997484	+	ENSG00000117010	1.62742
chr1	41012205	41012921	+	ENSG00000117010	5.08932
chr1	41304095	41304610	+	ENSG00000117013	3.34584
chr1	41326793	41327399	-	ENSG00000179862	17.4379
chr1	41327539	41327999	-	ENSG00000179862	10.3417
chr1	41483363	41483904	-	ENSG00000171790	3.73237
chr1	41847170	41847731	+	ENSG00000204060	5.77918
chr1	41848093	41848441	+	ENSG00000204060	5.36529
chr1	41975992	41977092	-	ENSG00000127124	29.5579
chr1	41978506	41979503	-	ENSG00000127124	29.7751
chr1	42045493	42046181	-	ENSG00000127124	3.85075
chr1	42046871	42047975	-	ENSG00000127124	2.90482
chr1	42048154	42048356	-	ENSG00000127124	3.39602
chr1	42050486	42050995	-	ENSG00000127124	11.6637
chr1	42645174	42645385	-	ENSG00000198815	2.41441
chr1	43212086	43212520	-	ENSG00000117385	19.6839
chr1	43308135	43309002	+	ENSG00000164010	15.2267
chr1	43316555	43317963	+	ENSG00000164011	20.9559
chr1	43392069	43392812	-	ENSG00000117394	7.74702
chr1	43915831	43916802	+	ENSG00000198198	25.0815
chr1	44056493	44057076	+	ENSG00000142949	10.5311
chr1	44069154	44069810	+	ENSG00000142949	9.5001
chr1	44169898	44170490	+	ENSG00000066135	5.6624
chr1	44402255	44402875	+	ENSG00000117407	16.1611
chr1	44412527	44413165	+	ENSG00000117408	10.6695
chr1	44414995	44415938	+	ENSG00000117408	11.6808
chr1	45101823	45102103	-	ENSG00000126106	5.9036
chr1	45271330	45272394	-	ENSG00000188396	4.02288
chr1	45278889	45279751	+	ENSG00000222009	6.77174
chr1	45483897	45484105	-	ENSG00000162415	1.97038
chr1	45671729	45672133	-	ENSG00000162415	5.47501
chr1	45792407	45794114	+	ENSG00000186603	15.403
chr1	45808586	45809497	+	ENSG00000132773	7.77162
chr1	45810934	45811191	-	ENSG00000070759	3.92336
chr1	46072916	46073991	+	ENSG00000132780	6.19244
chr1	46206725	46206963	-	ENSG00000197429	2.55921
chr1	46500455	46501753	+	ENSG00000086015	9.71901
chr1	46509156	46509373	-	ENSG00000117461	1.78856
chr1	46669097	46669449	+	ENSG00000171357	9.09766
chr1	46685226	46685889	+	ENSG00000171357	55.0061
chr1	46685226	46685889	-	ENSG00000085998	55.0061
chr1	46751128	46751705	-	ENSG00000132128	3.83471
chr1	46827202	46827723	+	ENSG00000117481	3.00756
chr1	47073715	47074042	-	ENSG00000142961	2.76902
chr1	47074198	47074397	-	ENSG00000142961	1.6143
chr1	47078503	47079211	-	ENSG00000142961	8.68688
chr1	47184320	47184712	-	ENSG00000159658	3.82408
chr1	47716814	47717600	-	ENSG00000123473	11.1136
chr1	47745784	47746792	-	ENSG00000123473	5.1084
chr1	47882243	47882442	+	ENSG00000186790	2.43334
chr1	47902221	47903308	+	ENSG00000186564	3.40643
chr1	47904955	47905318	+	ENSG00000186564	3.34584
chr1	49224473	49224913	-	ENSG00000162373	4.89379
chr1	51434457	51436361	+	ENSG00000123080	16.8795
chr1	51439414	51439908	+	ENSG00000123080	18.0505
chr1	51753824	51754024	-	ENSG00000085831	3.34584
chr1	52343867	52344401	-	ENSG00000078618	10.3418
chr1	52497891	52499346	-	ENSG00000198841	41.9298
chr1	52703312	52703676	+	ENSG00000157077	3.17024
chr1	52703947	52705078	+	ENSG00000157077	7.84995
chr1	52818251	52818887	-	ENSG00000154222	6.56314
chr1	52859026	52859461	-	ENSG00000085840	7.94002
chr1	52861602	52861872	-	ENSG00000085840	2.08984
chr1	52883290	52883773	+	ENSG00000134748	3.90408
chr1	52940520	52941226	-	ENSG00000134744	16.8874
chr1	52991300	52991683	-	ENSG00000134744	2.72999
chr1	53073943	53074360	+	ENSG00000116157	2.07348
chr1	53153106	53153972	-	ENSG00000162377	19.7167
chr1	53236653	53237412	+	ENSG00000162378	11.0668
chr1	53322698	53323414	+	ENSG00000203995	10.1007
chr1	53358603	53359084	+	ENSG00000203995	14.4296
chr1	53460298	53461429	+	ENSG00000116171	8.21252
chr1	53675676	53676822	+	ENSG00000157184	4.76883
chr1	53679843	53680459	-	ENSG00000162384	3.44434
chr1	54233464	54233764	-	ENSG00000058804	2.53717
chr1	54317505	54317773	-	ENSG00000058799	3.53824
chr1	54417666	54417883	+	ENSG00000116212	2.0782
chr1	54561935	54562688	+	ENSG00000116205	5.95187
chr1	54638959	54640650	-	ENSG00000215883	11.3096
chr1	55074619	55075689	-	ENSG00000162391	8.86599
chr1	55207077	55208017	+	ENSG00000243725	34.2788
chr1	55207077	55208017	+	ENSG00000184313	34.2788
chr1	55223342	55224779	-	ENSG00000162396	18.5258
chr1	55316207	55316664	-	ENSG00000116133	2.0956
chr1	55316879	55318111	-	ENSG00000116133	20.0512
chr1	55532097	55533101	-	ENSG00000162402	10.4873
chr1	55534275	55534761	-	ENSG00000162402	20.7478
chr1	57044771	57045158	-	ENSG00000162407	2.56554
chr1	57169669	57169993	+	ENSG00000162409	5.25306
chr1	59041256	59041583	-	ENSG00000184292	1.55615
chr1	59041731	59042870	-	ENSG00000184292	9.50288
chr1	59147601	59148225	-	ENSG00000162601	3.83836
chr1	59247112	59249669	-	ENSG00000177606	59.9557
chr1	61553837	61554374	+	ENSG00000162599	6.48529
chr1	62910405	62910883	+	ENSG00000162607	6.7951
chr1	62915985	62916401	+	ENSG00000162607	2.31818
chr1	63282203	63282604	+	ENSG00000125703	2.99799
chr1	63284524	63284871	+	ENSG00000125703	5.8382
chr1	64239703	64240081	+	ENSG00000185483	24.1412
chr1	64643048	64645285	+	ENSG00000185483	28.3921
chr1	65156960	65158020	+	ENSG00000158966	12.1164
chr1	65243225	65243770	+	ENSG00000162437	6.51255
chr1	65299877	65300097	-	ENSG00000162434	1.2688
chr1	67131622	67131883	-	ENSG00000248458	3.65001
chr1	67147574	67148098	+	ENSG00000118473	6.8214
chr1	67469795	67469994	-	ENSG00000116704	3.70981
chr1	68150933	68151148	+	ENSG00000116717	2.73115
chr1	68153399	68153779	+	ENSG00000116717	6.47761
chr1	72748002	72748376	-	ENSG00000172260	6.44541
chr1	76877840	76878137	+	ENSG00000184005	1.76784
chr1	77094230	77095257	+	ENSG00000184005	14.2278
chr1	78097472	78099021	-	ENSG00000036549	10.5065
chr1	78408122	78408383	+	ENSG00000162614	2.76029
chr1	78478661	78479304	+	ENSG00000162616	9.6794
chr1	79115943	79116445	+	ENSG00000137965	4.49173
chr1	82408656	82409475	+	ENSG00000117114	19.5017
chr1	82455951	82457329	+	ENSG00000117114	16.832
chr1	85624463	85624886	-	ENSG00000097096	5.19464
chr1	85647732	85648955	-	ENSG00000097096	7.48614
chr1	85655576	85656393	-	ENSG00000097096	4.86668
chr1	85665988	85666963	-	ENSG00000097096	11.8154
chr1	85718123	85718392	-	ENSG00000162642	3.67502
chr1	85733299	85733748	-	ENSG00000142867	3.95303
chr1	86048445	86049153	+	ENSG00000142871	7.17082
chr1	86815834	86817542	-	ENSG00000122417	24.0831
chr1	87794523	87794775	+	ENSG00000143013	3.09086
chr1	87810462	87810923	+	ENSG00000143013	4.37697
chr1	89448136	89449753	-	ENSG00000213516	24.6497
chr1	90048291	90050516	+	ENSG00000197147	20.2932
chr1	90227509	90228185	+	ENSG00000171488	8.36914
chr1	90492856	90493306	+	ENSG00000162664	2.05838
chr1	91403052	91403630	-	ENSG00000122482	11.8414
chr1	91404965	91405434	-	ENSG00000122482	4.57969
chr1	91406361	91406865	-	ENSG00000122482	8.05609
chr1	91989569	91989881	+	ENSG00000097046	5.62844
chr1	92642415	92642883	+	ENSG00000069712	14.4629
chr1	92645909	92646567	+	ENSG00000069712	7.75687
chr1	92647614	92648075	+	ENSG00000069712	11.3264
chr1	92649406	92649920	+	ENSG00000069712	9.73336
chr1	92853005	92853251	+	ENSG00000122484	3.88048
chr1	92940724	92941667	-	ENSG00000162676	4.86668
chr1	92979172	92979492	-	ENSG00000067208	4.01557
chr1	93602215	93602658	+	ENSG00000143033	16.4406
chr1	93645993	93646554	+	ENSG00000122483	1.59782
chr1	93811885	93812344	+	ENSG00000117505	3.26737
chr1	94018630	94018914	+	ENSG00000137942	3.90928
chr1	94047724	94048543	-	ENSG00000137936	20.4047
chr1	94342086	94342924	-	ENSG00000067334	3.07262
chr1	95709797	95710290	+	ENSG00000122481	13.4293
chr1	95709797	95710290	+	ENSG00000271092	13.4293
chr1	100154371	100155248	+	ENSG00000099260	6.21093
chr1	100547577	100547881	+	ENSG00000156875	1.87137
chr1	101004733	101004932	+	ENSG00000181656	2.12917
chr1	101339466	101340011	-	ENSG00000162694	9.2559
chr1	101342970	101343466	-	ENSG00000162694	8.52627
chr1	101704415	101706143	+	ENSG00000170989	15.3012
chr1	107599341	107600793	+	ENSG00000198890	11.323
chr1	107690832	107691424	+	ENSG00000162631	3.26583
chr1	107867006	107867608	+	ENSG00000162631	6.08335
chr1	108023348	108023799	+	ENSG00000162631	5.17085
chr1	108679032	108679504	-	ENSG00000085491	7.12694
chr1	109177840	109178089	+	ENSG00000162636	3.19749
chr1	109241874	109242688	+	ENSG00000134186	12.2846
chr1	109472215	109472686	-	ENSG00000121940	6.77631
chr1	109477150	109477511	-	ENSG00000121940	3.37957
chr1	109553647	109553985	-	ENSG00000085433	3.48532
chr1	109554180	109554401	-	ENSG00000085433	1.79848
chr1	109636908	109637354	+	ENSG00000215717	3.4948
chr1	109780379	109780725	+	ENSG00000031698	7.68799
chr1	109793198	109796081	+	ENSG00000143126	8.93727
chr1	109800945	109801342	+	ENSG00000143126	4.86668
chr1	109816302	109817589	+	ENSG00000143126	22.5101
chr1	109822320	109822970	-	ENSG00000134222	7.88791
chr1	110033645	110034308	+	ENSG00000162650	16.7581
chr1	110038326	110039079	+	ENSG00000174151	7.99425
chr1	110049849	110050966	-	ENSG00000181754	10.0375
chr1	110051281	110051580	-	ENSG00000181754	3.65001
chr1	110134789	110135328	+	ENSG00000065135	4.5232
chr1	110465640	110466543	+	ENSG00000184371	16.9599
chr1	110471387	110472809	+	ENSG00000184371	42.0775
chr1	110596185	110596669	+	ENSG00000143093	11.5793
chr1	110740865	110741073	+	ENSG00000197106	3.34584
chr1	110765675	110766600	+	ENSG00000116396	6.41455
chr1	110768463	110768810	+	ENSG00000116396	2.15542
chr1	110880734	110881607	+	ENSG00000162775	7.71203
chr1	110882095	110884951	+	ENSG00000162775	25.5809
chr1	110921630	110921928	-	ENSG00000168679	4.78802
chr1	111490589	111491059	-	ENSG00000121931	4.72996
chr1	111494030	111495241	-	ENSG00000121931	7.15949
chr1	111957105	111957952	-	ENSG00000085465	10.3006
chr1	112020658	112021117	+	ENSG00000143110	5.59856
chr1	112026022	112026455	-	ENSG00000121933	5.90197
chr1	112031248	112031628	-	ENSG00000121933	3.37255
chr1	112281636	112281993	-	ENSG00000197852	7.27776
chr1	112297828	112298067	+	ENSG00000064703	3.41194
chr1	112998575	113000762	+	ENSG00000143079	10.0706
chr1	113059871	113060122	+	ENSG00000134245	3.34584
chr1	113062919	113063264	+	ENSG00000134245	6.0706
chr1	113257331	113257530	-	ENSG00000155367	2.43334
chr1	113459635	113460520	-	ENSG00000155380	7.7262
chr1	114184374	114185123	+	ENSG00000081026	27.4935
chr1	114239883	114240115	-	ENSG00000116793	3.55557
chr1	114308577	114309051	-	ENSG00000081019	33.7168
chr1	114340045	114340695	-	ENSG00000081019	16.5889
chr1	114380466	114381042	-	ENSG00000134242	7.9255
chr1	114437760	114437971	-	ENSG00000134262	1.84555
chr1	114453809	114455342	+	ENSG00000118655	10.8966
chr1	114482928	114484048	+	ENSG00000163349	17.4183
chr1	114523745	114524256	+	ENSG00000116774	3.22501
chr1	115167848	115168663	-	ENSG00000175984	8.82086
chr1	116206157	116206608	+	ENSG00000173218	10.0202
chr1	116227915	116228328	+	ENSG00000173218	4.39744
chr1	116233563	116234584	+	ENSG00000173218	18.6605
chr1	117078563	117078976	-	ENSG00000116815	1.84404
chr1	117117264	117117476	-	ENSG00000143061	3.03441
chr1	117119222	117120343	-	ENSG00000143061	18.8378
chr1	117121915	117122585	-	ENSG00000143061	4.0514
chr1	117127102	117127487	-	ENSG00000143061	7.04705
chr1	117142530	117143040	-	ENSG00000143061	2.22159
chr1	117146144	117146562	-	ENSG00000143061	3.08804
chr1	117156528	117156954	-	ENSG00000143061	6.06511
chr1	117158560	117159069	-	ENSG00000143061	5.28529
chr1	117209081	117209689	-	ENSG00000143061	17.9459
chr1	117484220	117484619	+	ENSG00000134247	3.58582
chr1	117491817	117492376	+	ENSG00000134247	6.18693
chr1	117503718	117504349	+	ENSG00000134247	22.1196
chr1	117509361	117509933	+	ENSG00000134247	1.65057
chr1	117529376	117529860	+	ENSG00000134247	10.2036
chr1	117564397	117564596	+	ENSG00000134256	3.04167
chr1	117568233	117568432	+	ENSG00000134256	3.04167
chr1	117617586	117618325	+	ENSG00000116830	4.54304
chr1	117660725	117661538	-	ENSG00000134253	25.2519
chr1	117944687	117945009	+	ENSG00000198162	2.62527
chr1	118065442	118066057	+	ENSG00000198162	5.76377
chr1	118165704	118167130	+	ENSG00000183508	13.5638
chr1	118501924	118502245	+	ENSG00000065183	2.2322
chr1	119575416	119575953	-	ENSG00000116874	20.3702
chr1	120165031	120166925	-	ENSG00000143067	14.0776
chr1	120459032	120459264	-	ENSG00000134250	1.41421
chr1	120466388	120466670	-	ENSG00000134250	2.55775
chr1	120468137	120468383	-	ENSG00000134250	1.76784
chr1	120838992	120839422	+	ENSG00000188610	64.927
chr1	144828493	144829000	+	ENSG00000168614	14.6168
chr1	144851593	144852454	-	ENSG00000178104	13.8954
chr1	144882381	144882965	-	ENSG00000178104	6.40785
chr1	145473410	145473699	+	ENSG00000181039	3.03255
chr1	145473925	145474560	+	ENSG00000181039	3.43296
chr1	145522440	145522961	+	ENSG00000131779	9.40842
chr1	145542231	145542524	+	ENSG00000143127	3.00784
chr1	145561814	145562013	+	ENSG00000198483	2.12917
chr1	145562170	145562369	+	ENSG00000198483	2.73751
chr1	145585402	145585640	+	ENSG00000131788	1.66611
chr1	146033946	146034603	-	ENSG00000152042	10.524
chr1	146465904	146466349	+	ENSG00000186275	2.16989
chr1	147090672	147091822	+	ENSG00000116128	11.4969
chr1	147092151	147092731	+	ENSG00000116128	4.87277
chr1	147095681	147096926	+	ENSG00000116128	20.8499
chr1	147142304	147142619	-	ENSG00000162836	3.20296
chr1	147228891	147231070	-	ENSG00000143140	10.1195
chr1	147575540	147576142	-	ENSG00000203836	11.2095
chr1	148251487	148252160	-	ENSG00000203832	13.772
chr1	148556067	148556273	+	ENSG00000243452	2.22358
chr1	148580553	148580752	+	ENSG00000243452	1.86619
chr1	148757209	148757510	+	ENSG00000203827	17.6041
chr1	149857408	149857608	-	ENSG00000184678	3.13202
chr1	149871188	149872303	+	ENSG00000178096	21.3922
chr1	149885016	149885514	-	ENSG00000159164	10.95
chr1	149898347	149899079	-	ENSG00000143368	2.91325
chr1	149915450	149917029	-	ENSG00000163113	17.9464
chr1	150122127	150122599	+	ENSG00000023902	6.57717
chr1	150131024	150131910	+	ENSG00000023902	34.8326
chr1	150258899	150259354	+	ENSG00000159208	8.94632
chr1	150280396	150280674	+	ENSG00000187145	2.1653
chr1	150443131	150445919	+	ENSG00000163125	19.6142
chr1	150479359	150479932	+	ENSG00000143374	8.25042
chr1	150530367	150530591	+	ENSG00000143382	2.02662
chr1	150549408	150550115	-	ENSG00000143384	10.0717
chr1	150923050	150923821	+	ENSG00000143379	9.66535
chr1	150932990	150933669	+	ENSG00000143379	46.9143
chr1	150974721	150975137	-	ENSG00000143409	9.93381
chr1	150978822	150979307	-	ENSG00000143409	4.95989
chr1	151006355	151007395	+	ENSG00000143363	15.4049
chr1	151025361	151025937	-	ENSG00000197622	6.3361
chr1	151039772	151040054	+	ENSG00000213190	2.6845
chr1	151090354	151090916	+	ENSG00000143458	6.85645
chr1	151104466	151105857	-	ENSG00000143434	14.9105
chr1	151131716	151132059	+	ENSG00000163154	2.12917
chr1	151137873	151138304	-	ENSG00000163155	4.60115
chr1	151171108	151171342	+	ENSG00000143398	2.88546
chr1	151258714	151261013	+	ENSG00000143373	22.8481
chr1	151264858	151265452	-	ENSG00000143393	3.67845
chr1	151288069	151289067	-	ENSG00000143393	24.5576
chr1	151315054	151315349	-	ENSG00000143390	2.36524
chr1	151377216	151378824	-	ENSG00000143442	14.175
chr1	151491032	151491886	+	ENSG00000143375	16.1209
chr1	151509738	151509940	+	ENSG00000143375	3.26583
chr1	151510799	151511013	+	ENSG00000143375	2.73751
chr1	151554177	151554665	+	ENSG00000143367	5.43951
chr1	151846558	151847332	-	ENSG00000159445	9.9246
chr1	152281922	152282286	-	ENSG00000143631	2.73751
chr1	153533807	153534140	-	ENSG00000196754	2.87911
chr1	153651239	153652201	+	ENSG00000169418	9.23491
chr1	153665896	153666382	+	ENSG00000169418	3.85075
chr1	153752267	153752515	+	ENSG00000143554	2.6809
chr1	153800372	153800827	-	ENSG00000143614	6.95223
chr1	153954240	153954607	-	ENSG00000143545	1.75876
chr1	154321334	154322013	+	ENSG00000143515	16.4201
chr1	154437579	154438468	+	ENSG00000160712	25.083
chr1	154461432	154461838	-	ENSG00000169291	2.08871
chr1	154474023	154474506	-	ENSG00000169291	12.8943
chr1	154475243	154475456	+	ENSG00000163239	2.02691
chr1	154573541	154575100	-	ENSG00000160710	16.628
chr1	154679933	154680692	-	ENSG00000143603	5.17993
chr1	154744692	154745039	-	ENSG00000143603	8.02581
chr1	154918236	154918845	-	ENSG00000163346	7.47209
chr1	154930901	154931431	-	ENSG00000163348	3.15295
chr1	154931821	154932222	-	ENSG00000163348	2.76256
chr1	154960008	154961414	+	ENSG00000160688	10.8768
chr1	155034944	155035196	+	ENSG00000143537	1.53475
chr1	155041351	155041989	+	ENSG00000243364	9.86177
chr1	155106434	155107090	+	ENSG00000169242	4.61865
chr1	155156391	155156672	+	ENSG00000163462	2.38143
chr1	155160728	155161042	-	ENSG00000185499	3.18848
chr1	155232840	155233039	-	ENSG00000176444	1.74942
chr1	155252257	155252911	+	ENSG00000143630	6.38752
chr1	155257616	155257946	+	ENSG00000143630	6.36855
chr1	155258157	155258590	+	ENSG00000143630	3.0353
chr1	155292286	155292683	+	ENSG00000160753	2.12697
chr1	155408129	155408879	-	ENSG00000116539	10.2579
chr1	155447550	155448232	-	ENSG00000116539	14.6424
chr1	155448725	155448939	-	ENSG00000116539	2.11927
chr1	155451065	155452413	-	ENSG00000116539	11.4756
chr1	155490789	155491379	-	ENSG00000116539	23.5857
chr1	155629389	155630023	-	ENSG00000163374	4.22763
chr1	155630404	155630795	-	ENSG00000163374	1.77065
chr1	155707895	155708271	+	ENSG00000132676	3.38944
chr1	155719163	155720644	-	ENSG00000116580	12.85
chr1	155721581	155722508	-	ENSG00000116580	4.90898
chr1	155734711	155736494	-	ENSG00000116580	7.27559
chr1	155823251	155823563	-	ENSG00000116580	3.84797
chr1	155837735	155838405	+	ENSG00000132718	12.402
chr1	155852305	155852519	+	ENSG00000132718	2.18575
chr1	155854476	155854788	+	ENSG00000132718	6.13763
chr1	155882891	155883348	-	ENSG00000132680	4.98754
chr1	155883799	155884077	-	ENSG00000132680	1.98576
chr1	155917397	155917972	-	ENSG00000116584	6.15475
chr1	155978857	155979193	-	ENSG00000163479	7.25472
chr1	156084550	156084770	+	ENSG00000160789	3.49711
chr1	156146610	156147436	+	ENSG00000196189	7.90835
chr1	156235689	156236107	-	ENSG00000198952	4.35193
chr1	156261245	156261814	+	ENSG00000163472	4.58758
chr1	156262532	156262951	-	ENSG00000198715	3.43386
chr1	156495904	156496246	-	ENSG00000183856	5.20405
chr1	156616339	156616903	+	ENSG00000132692	7.87959
chr1	156639788	156640077	-	ENSG00000132688	1.6505
chr1	156640246	156640559	-	ENSG00000132688	1.63688
chr1	156640751	156641379	-	ENSG00000132688	8.1016
chr1	156641998	156642790	-	ENSG00000132688	1.22526
chr1	156692879	156693389	-	ENSG00000143319	7.64675
chr1	156698329	156699073	+	ENSG00000143303	31.2738
chr1	156703993	156704283	+	ENSG00000143303	3.5683
chr1	156756286	156756829	+	ENSG00000143294	14.2563
chr1	156770156	156770425	+	ENSG00000143294	1.78905
chr1	156883674	156884085	+	ENSG00000187800	10.1551
chr1	156884288	156884964	+	ENSG00000187800	19.1077
chr1	156909199	156909723	-	ENSG00000132694	4.54315
chr1	157094355	157095902	-	ENSG00000117036	21.3969
chr1	159999299	159999506	-	ENSG00000143315	2.10686
chr1	159999986	160000280	-	ENSG00000143315	4.88215
chr1	160000542	160001711	-	ENSG00000143315	10.619
chr1	160062860	160063144	-	ENSG00000162729	3.95777
chr1	160063476	160063777	-	ENSG00000162729	1.45786
chr1	160209246	160210226	-	ENSG00000132716	13.7133
chr1	160209246	160210226	-	ENSG00000258465	13.7133
chr1	160340540	160340865	+	ENSG00000171786	5.47501
chr1	160967865	160968296	-	ENSG00000270149	3.58835
chr1	160967865	160968296	-	ENSG00000158769	3.58835
chr1	161009192	161010013	-	ENSG00000158773	10.5479
chr1	161017888	161018199	-	ENSG00000186517	2.39818
chr1	161090383	161090634	+	ENSG00000158793	3.26288
chr1	161130499	161130937	+	ENSG00000143258	3.68123
chr1	161160668	161161351	-	ENSG00000158859	10.7673
chr1	161168497	161168818	-	ENSG00000158859	5.81318
chr1	161198587	161199221	+	ENSG00000158882	6.79995
chr1	161199837	161200516	+	ENSG00000158882	15.0157
chr1	161495140	161495401	+	ENSG00000173110	2.43334
chr1	161496125	161496369	+	ENSG00000173110	2.12917
chr1	161928179	161928722	+	ENSG00000118217	8.91383
chr1	161953598	161954163	-	ENSG00000162745	15.2084
chr1	161967677	161968019	-	ENSG00000162745	3.03255
chr1	162336793	162337145	+	ENSG00000198929	2.38688
chr1	162351828	162352110	+	ENSG00000239887	2.46364
chr1	162824654	162825126	-	ENSG00000185860	4.89874
chr1	165877037	165877260	+	ENSG00000143179	4.09939
chr1	166039284	166040054	-	ENSG00000188859	21.5959
chr1	166818255	166820019	+	ENSG00000143157	16.9809
chr1	166821709	166822333	+	ENSG00000143157	12.7168
chr1	167384719	167385532	+	ENSG00000143190	10.6688
chr1	167757070	167757347	+	ENSG00000197965	2.24398
chr1	168053756	168055183	-	ENSG00000143147	32.3553
chr1	168065569	168066322	-	ENSG00000143147	7.71174
chr1	168211613	168212302	+	ENSG00000213064	11.9128
chr1	169100545	169100830	+	ENSG00000143153	2.01823
chr1	169390746	169391417	-	ENSG00000117477	9.47878
chr1	169558105	169558852	-	ENSG00000174175	4.72182
chr1	169586247	169586776	-	ENSG00000174175	4.66518
chr1	169660386	169660917	-	ENSG00000188404	3.11022
chr1	169677657	169678057	-	ENSG00000188404	7.21477
chr1	169761705	169762096	-	ENSG00000171806	3.02061
chr1	169762400	169762923	-	ENSG00000171806	8.91103
chr1	169822558	169822990	-	ENSG00000000457	8.53532
chr1	169823326	169824043	-	ENSG00000000457	4.45451
chr1	170521111	170521516	+	ENSG00000120370	3.47526
chr1	171310580	171310784	+	ENSG00000076258	2.73751
chr1	171501566	171502161	+	ENSG00000117523	8.54798
chr1	171509264	171511267	+	ENSG00000117523	6.86723
chr1	171560739	171561157	+	ENSG00000117523	3.64158
chr1	171752797	171753684	+	ENSG00000010165	3.69245
chr1	172558267	172559022	+	ENSG00000094975	2.55446
chr1	172579025	172579520	+	ENSG00000094975	24.3068
chr1	173009894	173010893	-	ENSG00000120337	9.56645
chr1	173154831	173155951	-	ENSG00000117586	22.2387
chr1	173702735	173703408	+	ENSG00000076321	9.40328
chr1	173754186	173754834	+	ENSG00000076321	4.25392
chr1	173769131	173769796	-	ENSG00000120334	7.63392
chr1	173771933	173772609	-	ENSG00000120334	14.412
chr1	173793827	173794363	+	ENSG00000117593	10.0394
chr1	173839926	173840205	+	ENSG00000185278	2.71747
chr1	173991170	173991455	-	ENSG00000135870	3.67196
chr1	175128720	175130269	-	ENSG00000265365	14.4802
chr1	176525633	176526238	+	ENSG00000116183	3.95418
chr1	176563739	176564193	+	ENSG00000116183	3.34584
chr1	178411754	178412255	+	ENSG00000075391	6.71779
chr1	178426886	178427649	+	ENSG00000075391	9.03798
chr1	178514766	178514991	+	ENSG00000184909	3.04167
chr1	178834248	178834891	-	ENSG00000116194	4.25834
chr1	178885347	178886087	+	ENSG00000116191	22.2729
chr1	179012970	179013347	+	ENSG00000116199	5.88594
chr1	179040985	179041821	+	ENSG00000116199	9.17975
chr1	179064115	179064617	+	ENSG00000186283	19.9514
chr1	179076460	179078581	-	ENSG00000143322	20.5373
chr1	179322667	179323018	+	ENSG00000057252	3.35146
chr1	179815132	179815904	-	ENSG00000169905	20.4757
chr1	179886785	179887477	+	ENSG00000143337	16.6441
chr1	179965766	179966143	+	ENSG00000135837	4.82432
chr1	179983090	179983479	+	ENSG00000135837	1.54869
chr1	179989729	179990172	+	ENSG00000135837	3.16722
chr1	180062619	180063129	+	ENSG00000135837	3.07841
chr1	180080130	180080643	+	ENSG00000135837	7.93414
chr1	180080865	180081162	+	ENSG00000135837	2.87503
chr1	180081459	180081761	+	ENSG00000135837	2.3945
chr1	180166485	180166811	+	ENSG00000116260	1.63707
chr1	180471277	180471750	-	ENSG00000135847	4.47054
chr1	180601205	180601404	+	ENSG00000143324	3.35641
chr1	180853272	180853737	+	ENSG00000143324	13.5825
chr1	180885390	180885928	+	ENSG00000135835	3.96565
chr1	180904267	180905674	+	ENSG00000135835	10.6459
chr1	180915371	180915706	+	ENSG00000135835	6.99585
chr1	180919247	180920042	+	ENSG00000135835	14.1581
chr1	180942735	180942965	-	ENSG00000135823	3.59273
chr1	180945154	180945871	-	ENSG00000135823	16.0294
chr1	181057956	181059793	+	ENSG00000162783	29.554
chr1	182353546	182353893	-	ENSG00000135821	1.77506
chr1	182554536	182554804	-	ENSG00000135828	3.68882
chr1	182554946	182555981	-	ENSG00000135828	5.35567
chr1	182569064	182569314	-	ENSG00000143333	3.04167
chr1	182992601	182993286	+	ENSG00000135862	6.02478
chr1	183111615	183112329	+	ENSG00000135862	14.0603
chr1	183212275	183213159	+	ENSG00000058085	10.4262
chr1	183219156	183219435	-	ENSG00000157064	3.04167
chr1	183522109	183522349	+	ENSG00000116698	2.79907
chr1	183604580	183604857	-	ENSG00000162704	3.09187
chr1	183895073	183896268	+	ENSG00000143344	14.2372
chr1	184588614	184589072	+	ENSG00000116667	1.19703
chr1	184663033	184663623	-	ENSG00000116406	7.2982
chr1	184763907	184765045	-	ENSG00000135842	7.99278
chr1	185143375	185144311	+	ENSG00000116668	12.7811
chr1	186158587	186159053	+	ENSG00000143341	17.3255
chr1	186643536	186643757	-	ENSG00000073756	3.45722
chr1	193038133	193038452	+	ENSG00000116747	2.07339
chr1	197070283	197070851	-	ENSG00000066279	5.62737
chr1	197073393	197073914	-	ENSG00000066279	5.81139
chr1	197128379	197129118	-	ENSG00000177888	30.0511
chr1	197168681	197168946	-	ENSG00000177888	2.85873
chr1	197479521	197480089	-	ENSG00000213047	6.91374
chr1	200017212	200017794	+	ENSG00000116833	27.466
chr1	200143036	200143983	+	ENSG00000116833	19.4247
chr1	200376051	200379024	-	ENSG00000162702	14.5443
chr1	200522534	200522892	-	ENSG00000118193	2.47433
chr1	200586817	200587813	-	ENSG00000118193	10.7131
chr1	200635034	200635233	-	ENSG00000118197	2.77814
chr1	200817187	200817560	+	ENSG00000118200	4.22725
chr1	200817740	200818477	+	ENSG00000118200	8.2316
chr1	200818847	200819227	+	ENSG00000118200	4.33404
chr1	201434839	201435391	-	ENSG00000174307	3.68398
chr1	201591835	201592756	+	ENSG00000269690	12.1001
chr1	201617642	201618394	+	ENSG00000134369	9.64874
chr1	201750261	201750484	+	ENSG00000134369	1.30912
chr1	201751528	201752073	+	ENSG00000134369	4.5754
chr1	201752356	201752877	+	ENSG00000134369	2.73398
chr1	201788947	201789744	+	ENSG00000134369	13.3967
chr1	201790255	201790522	+	ENSG00000134369	2.19559
chr1	201790692	201792263	+	ENSG00000134369	16.7194
chr1	201844958	201845792	+	ENSG00000198700	17.434
chr1	201846696	201848562	+	ENSG00000198700	5.66797
chr1	201852556	201852797	+	ENSG00000198700	1.91605
chr1	201984422	201984840	+	ENSG00000163435	2.43334
chr1	202116253	202117698	-	ENSG00000143851	10.4542
chr1	202555192	202555474	+	ENSG00000077157	3.08804
chr1	202697861	202698407	-	ENSG00000117139	11.5644
chr1	202698654	202699217	-	ENSG00000117139	11.3397
chr1	202910289	202910615	-	ENSG00000159346	1.87276
chr1	203708684	203709268	+	ENSG00000058668	6.78003
chr1	203765396	203765699	+	ENSG00000058673	1.43854
chr1	203765396	203765699	+	ENSG00000257315	1.43854
chr1	203766094	203766953	+	ENSG00000257315	8.09906
chr1	203767517	203768405	+	ENSG00000257315	6.31059
chr1	203769164	203769363	+	ENSG00000257315	1.68105
chr1	203816415	203816740	+	ENSG00000058673	2.63427
chr1	203821350	203821622	+	ENSG00000058673	2.05391
chr1	204094970	204095660	+	ENSG00000143842	25.2379
chr1	204159613	204160051	-	ENSG00000170498	2.56601
chr1	204190336	204190769	-	ENSG00000143850	2.93941
chr1	204190959	204191893	-	ENSG00000143850	27.4778
chr1	204228515	204228728	-	ENSG00000143850	4.72158
chr1	204375157	204375572	-	ENSG00000158615	6.08363
chr1	204378460	204381048	-	ENSG00000158615	14.3015
chr1	204393376	204393577	-	ENSG00000133056	2.35168
chr1	204393720	204394032	-	ENSG00000133056	4.14516
chr1	204438026	204439034	-	ENSG00000133056	11.0066
chr1	204518247	204518893	+	ENSG00000198625	27.2104
chr1	205052506	205053618	-	ENSG00000174529	10.6943
chr1	205057689	205058071	-	ENSG00000117222	3.08527
chr1	205116349	205116927	-	ENSG00000133059	8.2611
chr1	205138364	205139136	-	ENSG00000133059	21.1031
chr1	205156359	205157009	-	ENSG00000133059	15.2369
chr1	205197261	205197670	+	ENSG00000133069	4.2881
chr1	205238084	205238993	+	ENSG00000133069	26.2543
chr1	205271271	205271855	-	ENSG00000163545	6.69168
chr1	205272083	205273212	-	ENSG00000163545	8.39055
chr1	205569666	205570116	+	ENSG00000174514	5.36529
chr1	205585434	205585860	-	ENSG00000158711	4.35118
chr1	205589011	205589963	-	ENSG00000158711	12.8096
chr1	205631912	205632874	-	ENSG00000158715	22.0428
chr1	205738393	205738916	-	ENSG00000117280	6.78457
chr1	205779036	205780269	-	ENSG00000133065	7.12845
chr1	206634458	206635016	+	ENSG00000163486	5.11009
chr1	206636962	206637645	+	ENSG00000163486	3.59898
chr1	206669550	206669879	+	ENSG00000143466	3.18884
chr1	206760325	206760665	+	ENSG00000136653	5.25876
chr1	206808919	206809141	+	ENSG00000143479	2.5578
chr1	206820760	206822171	+	ENSG00000143479	14.7713
chr1	206905868	206906390	+	ENSG00000162889	7.45639
chr1	207221738	207223085	-	ENSG00000180667	14.4544
chr1	207223998	207224199	-	ENSG00000180667	2.54148
chr1	208060715	208061329	-	ENSG00000174059	5.39606
chr1	208195887	208196794	-	ENSG00000076356	6.72648
chr1	208197393	208198229	-	ENSG00000076356	3.14971
chr1	208198615	208200753	-	ENSG00000076356	22.463
chr1	208389982	208391543	-	ENSG00000076356	39.2106
chr1	208416799	208417698	-	ENSG00000076356	15.2986
chr1	209788312	209788782	-	ENSG00000196878	7.23147
chr1	209849251	209849562	+	ENSG00000123689	3.65001
chr1	209956021	209957094	-	ENSG00000162757	23.387
chr1	209963803	209964049	-	ENSG00000117595	2.23822
chr1	210029444	210029653	+	ENSG00000117597	2.2165
chr1	210273324	210273587	+	ENSG00000143469	4.90605
chr1	210334137	210334392	+	ENSG00000143469	3.65001
chr1	210414852	210415884	+	ENSG00000082497	11.3458
chr1	210847520	210847971	+	ENSG00000054392	5.56471
chr1	211545521	211546202	+	ENSG00000082512	34.5306
chr1	211547376	211548016	+	ENSG00000082512	8.5489
chr1	211748647	211749253	-	ENSG00000170385	20.8397
chr1	211749393	211749750	-	ENSG00000170385	2.46275
chr1	212115130	212115499	-	ENSG00000143493	8.21037
chr1	212273817	212274508	+	ENSG00000143476	5.42438
chr1	212458885	212459106	+	ENSG00000066027	2.44674
chr1	212459398	212459643	+	ENSG00000066027	1.42628
chr1	212502412	212502750	+	ENSG00000066027	1.38969
chr1	212502412	212502750	+	ENSG00000270045	1.38969
chr1	212538316	212538665	-	ENSG00000065600	4.71424
chr1	212911706	212912083	-	ENSG00000117697	4.26978
chr1	213031572	213032134	+	ENSG00000162769	31.6889
chr1	213145926	213146203	+	ENSG00000143494	4.61746
chr1	213414197	213415640	+	ENSG00000136643	11.2906
chr1	213445904	213446155	+	ENSG00000136643	2.15453
chr1	214161349	214161606	+	ENSG00000117707	3.44569
chr1	214169896	214171484	+	ENSG00000117707	9.31427
chr1	214556591	214558126	-	ENSG00000152104	12.8335
chr1	214813476	214813962	+	ENSG00000117724	3.1607
chr1	214815242	214815755	+	ENSG00000117724	2.50521
chr1	214816314	214816822	+	ENSG00000117724	4.98225
chr1	214817758	214819632	+	ENSG00000117724	6.50825
chr1	214819871	214820799	+	ENSG00000117724	4.47694
chr1	214830235	214830544	+	ENSG00000117724	1.69396
chr1	215793304	215793852	+	ENSG00000136636	3.496
chr1	217604362	217604733	-	ENSG00000092978	8.36273
chr1	217793139	217793821	-	ENSG00000092978	30.9952
chr1	218614659	218615263	+	ENSG00000092969	7.30002
chr1	220835074	220835519	+	ENSG00000116141	11.9892
chr1	220863749	220864224	+	ENSG00000162817	7.05328
chr1	220869949	220871056	+	ENSG00000162817	6.29787
chr1	220871277	220871858	+	ENSG00000162817	3.49346
chr1	220986801	220987155	+	ENSG00000186205	8.21252
chr1	220987342	220987541	+	ENSG00000186205	2.43334
chr1	221052073	221052406	+	ENSG00000136630	3.06108
chr1	221052902	221053289	+	ENSG00000136630	2.72363
chr1	221057399	221058381	+	ENSG00000136630	18.0094
chr1	221875383	221876084	-	ENSG00000143507	3.07679
chr1	221912248	221913060	-	ENSG00000143507	7.05669
chr1	222800990	222801920	+	ENSG00000154305	3.83382
chr1	222802211	222803512	+	ENSG00000154305	8.84126
chr1	222838635	222838971	+	ENSG00000154305	5.29338
chr1	222885838	222886216	+	ENSG00000162819	3.14897
chr1	223284001	223284350	-	ENSG00000187554	3.04167
chr1	223285055	223285341	-	ENSG00000187554	3.95418
chr1	223285587	223285797	-	ENSG00000187554	3.65001
chr1	223968118	223968669	-	ENSG00000143514	12.8986
chr1	223983657	223984327	-	ENSG00000143514	7.36498
chr1	223985756	223986273	-	ENSG00000143514	1.67177
chr1	224345027	224345722	+	ENSG00000143756	12.8433
chr1	224377199	224377714	+	ENSG00000143753	2.73455
chr1	224377851	224378155	+	ENSG00000143753	1.10788
chr1	224415168	224415373	-	ENSG00000143748	1.68219
chr1	224577133	224577736	-	ENSG00000162923	18.7973
chr1	225685163	225685610	-	ENSG00000154380	5.65211
chr1	225706828	225707247	-	ENSG00000154380	5.90377
chr1	226034338	226034819	-	ENSG00000196187	2.85013
chr1	226175426	226176136	-	ENSG00000143751	17.0931
chr1	226339893	226340422	-	ENSG00000182827	10.9753
chr1	226420042	226420243	-	ENSG00000183814	1.44243
chr1	226923244	226924909	-	ENSG00000143772	25.9282
chr1	227083015	227083713	+	ENSG00000143801	10.7314
chr1	227181684	227182077	-	ENSG00000143776	6.21226
chr1	227216389	227216975	-	ENSG00000143776	8.89952
chr1	227505329	227506150	-	ENSG00000143776	20.355
chr1	227919099	227919435	-	ENSG00000081692	3.19039
chr1	227935516	227936052	+	ENSG00000143740	6.89109
chr1	227946545	227947022	+	ENSG00000143740	2.56897
chr1	227968361	227968843	+	ENSG00000143740	14.3447
chr1	228108613	228108871	-	ENSG00000143816	1.71806
chr1	228109189	228109746	-	ENSG00000143816	12.0621
chr1	228291510	228292400	-	ENSG00000143793	11.3941
chr1	228345823	228346812	+	ENSG00000198835	39.2376
chr1	228475783	228476053	+	ENSG00000154358	2.43334
chr1	228644903	228645317	-	ENSG00000181218	4.53185
chr1	228681938	228682156	+	ENSG00000168159	1.73307
chr1	228879069	228879488	+	ENSG00000116574	4.61746
chr1	229462313	229462765	-	ENSG00000154429	5.58333
chr1	229653821	229654148	-	ENSG00000135776	4.41359
chr1	229729602	229731024	-	ENSG00000135801	31.6843
chr1	229737758	229738569	-	ENSG00000135801	8.12796
chr1	229770740	229773203	+	ENSG00000135763	17.2849
chr1	229773533	229774091	+	ENSG00000135763	8.12154
chr1	229794838	229795157	+	ENSG00000135763	4.21034
chr1	230829014	230829381	+	ENSG00000135775	3.58671
chr1	230979122	230979411	-	ENSG00000119280	2.21585
chr1	231135897	231136249	+	ENSG00000173409	7.57454
chr1	231155334	231155982	-	ENSG00000182118	26.945
chr1	231374507	231374851	-	ENSG00000143633	1.98255
chr1	231413201	231413445	+	ENSG00000116906	1.76636
chr1	231471330	231473569	-	ENSG00000116903	31.7725
chr1	231487062	231487414	+	ENSG00000010072	1.39559
chr1	231501896	231502268	-	ENSG00000135766	1.75006
chr1	231556614	231557992	-	ENSG00000135766	8.52829
chr1	231829627	231830576	+	ENSG00000162946	8.24154
chr1	231829627	231830576	+	ENSG00000270106	8.24154
chr1	232172461	232173064	+	ENSG00000162946	8.47994
chr1	232534593	232534863	-	ENSG00000116991	2.5794
chr1	232600670	232601199	-	ENSG00000116991	7.00733
chr1	232649789	232650328	-	ENSG00000116991	4.54827
chr1	232650556	232650922	-	ENSG00000116991	5.2751
chr1	232941327	232943886	+	ENSG00000212916	6.31303
chr1	233393800	233395162	-	ENSG00000135749	12.4663
chr1	233515182	233515470	+	ENSG00000143674	2.93627
chr1	233518003	233518525	+	ENSG00000143674	20.0751
chr1	233807118	233807616	+	ENSG00000135750	2.65814
chr1	234613740	234614484	-	ENSG00000059588	5.77918
chr1	234614664	234614895	-	ENSG00000059588	5.77918
chr1	234742700	234743688	-	ENSG00000168264	42.0817
chr1	234744021	234745284	-	ENSG00000168264	6.84957
chr1	235295004	235295376	-	ENSG00000188739	5.07569
chr1	235331555	235331996	-	ENSG00000054267	2.0376
chr1	235345196	235345861	-	ENSG00000054267	6.74626
chr1	235505368	235505751	+	ENSG00000152904	3.24619
chr1	235613444	235613702	-	ENSG00000162885	2.19833
chr1	235922457	235922901	-	ENSG00000143669	4.28003
chr1	235969321	235969605	-	ENSG00000143669	3.74897
chr1	235971924	235972865	-	ENSG00000143669	8.43139
chr1	235973153	235973725	-	ENSG00000143669	6.47226
chr1	236140953	236141216	-	ENSG00000116962	3.37343
chr1	236714600	236715234	+	ENSG00000116977	4.3962
chr1	237060797	237061635	+	ENSG00000116984	8.39558
chr1	237062077	237062715	+	ENSG00000116984	4.6002
chr1	237066720	237067149	+	ENSG00000116984	13.8976
chr1	241797006	241799402	-	ENSG00000203668	12.4232
chr1	242042047	242042363	+	ENSG00000174371	2.88486
chr1	243327697	243329399	-	ENSG00000143702	4.3452
chr1	243354410	243354790	-	ENSG00000143702	4.01978
chr1	244216949	244218689	+	ENSG00000179456	31.43
chr1	244219787	244220227	+	ENSG00000179456	2.97593
chr1	244723934	244724416	+	ENSG00000179397	12.698
chr1	244735709	244736049	+	ENSG00000179397	2.66591
chr1	244868866	244869260	+	ENSG00000121644	9.05338
chr1	245027021	245027485	-	ENSG00000153187	1.75597
chr1	245133135	245133334	+	ENSG00000203666	1.96897
chr1	245851098	245851536	+	ENSG00000162849	3.65001
chr1	245865795	245866326	+	ENSG00000162849	8.51669
chr1	246754853	246755237	+	ENSG00000162852	8.2611
chr1	246810406	246811419	+	ENSG00000162852	18.1057
chr1	246828958	246829476	+	ENSG00000162852	17.4408
chr1	247012935	247013425	-	ENSG00000153207	4.87868
chr1	247013858	247014644	-	ENSG00000153207	8.12589
chr1	247286460	247287270	-	ENSG00000196418	5.10701
chr1	247581974	247582297	+	ENSG00000162711	4.56251
chr1	247587273	247587598	+	ENSG00000162711	4.56251
chr1	247587996	247588813	+	ENSG00000162711	6.06511
chr1	248039240	248039579	+	ENSG00000162722	4.56251
chr1	248059086	248059500	+	ENSG00000238243	2.73751
chr1	249105409	249106689	-	ENSG00000175137	9.9698
chr1	249119279	249119569	-	ENSG00000175137	6.27144
chr1	249144177	249144576	-	ENSG00000171163	8.4124
chr1	249210786	249212725	+	ENSG00000185220	45.0501
chr10	180237	180653	+	ENSG00000015171	3.65001
chr10	322910	323503	-	ENSG00000151240	12.5412
chr10	858887	859196	-	ENSG00000107929	1.59368
chr10	1063104	1063331	+	ENSG00000107937	1.73669
chr10	3823789	3824547	-	ENSG00000067082	13.2343
chr10	5498643	5499075	+	ENSG00000173848	10.2301
chr10	5680981	5682844	-	ENSG00000196372	32.9138
chr10	5772464	5773251	+	ENSG00000108021	3.79243
chr10	5781775	5782410	+	ENSG00000108021	4.94483
chr10	5784172	5784647	+	ENSG00000108021	1.36005
chr10	5788105	5789167	+	ENSG00000108021	9.77022
chr10	5790620	5791741	+	ENSG00000108021	13.0793
chr10	5904061	5904569	-	ENSG00000134461	8.81442
chr10	5930875	5931266	-	ENSG00000134461	6.33778
chr10	5931403	5931754	-	ENSG00000134461	5.52109
chr10	5947852	5948539	+	ENSG00000134452	11.6954
chr10	5979184	5979419	+	ENSG00000134452	2.20426
chr10	5994468	5995278	-	ENSG00000134470	4.43758
chr10	6469246	6469505	-	ENSG00000065675	4.5476
chr10	6469645	6470453	-	ENSG00000065675	10.7202
chr10	7201971	7202677	-	ENSG00000198879	17.4289
chr10	7202887	7203404	-	ENSG00000198879	3.19545
chr10	7203606	7204771	-	ENSG00000198879	3.81164
chr10	7205238	7205853	-	ENSG00000198879	7.69802
chr10	8005901	8007847	+	ENSG00000165632	9.48291
chr10	8056462	8057030	+	ENSG00000165632	15.1414
chr10	8116182	8116499	+	ENSG00000107485	3.3397
chr10	11503983	11505833	-	ENSG00000148429	16.9574
chr10	11805458	11805933	+	ENSG00000134463	6.95785
chr10	11962609	11963199	-	ENSG00000151461	6.44383
chr10	12070618	12071646	-	ENSG00000151461	20.2407
chr10	12076868	12077530	-	ENSG00000151461	12.4002
chr10	12162904	12163530	+	ENSG00000181192	5.96692
chr10	12391492	12391710	+	ENSG00000183049	3.95418
chr10	12870697	12871191	+	ENSG00000183049	38.4179
chr10	12876320	12876519	+	ENSG00000183049	2.26316
chr10	13541655	13542120	-	ENSG00000165626	9.26321
chr10	13687006	13687252	-	ENSG00000151474	2.26944
chr10	13687923	13689013	-	ENSG00000151474	21.9184
chr10	13698728	13699623	-	ENSG00000151474	6.74555
chr10	14562730	14563316	-	ENSG00000065809	10.9776
chr10	14861710	14862216	-	ENSG00000185267	10.1177
chr10	14950289	14951398	-	ENSG00000152457	11.0569
chr10	15138518	15139114	-	ENSG00000176236	1.62742
chr10	15254408	15256187	-	ENSG00000148468	34.3935
chr10	15256355	15256561	-	ENSG00000148468	1.83224
chr10	15558594	15559061	-	ENSG00000077943	6.99585
chr10	15902231	15902430	-	ENSG00000148481	4.35928
chr10	16526475	16526826	+	ENSG00000165983	5.36529
chr10	16632780	16633274	-	ENSG00000148484	3.00353
chr10	16633609	16634136	-	ENSG00000148484	3.09768
chr10	16866748	16867108	-	ENSG00000107611	3.12999
chr10	17184032	17185244	-	ENSG00000107614	19.0248
chr10	17189549	17189992	-	ENSG00000107614	7.36607
chr10	17362565	17363380	-	ENSG00000148488	28.3363
chr10	17756543	17757050	+	ENSG00000136738	6.48769
chr10	18964035	18964262	+	ENSG00000165997	2.36093
chr10	20105708	20106160	+	ENSG00000120594	3.70265
chr10	20568553	20569243	+	ENSG00000120594	20.2885
chr10	21783218	21784920	-	ENSG00000204682	15.9898
chr10	21785562	21786149	-	ENSG00000204682	8.09974
chr10	21803913	21805441	-	ENSG00000180592	7.5534
chr10	21806082	21806565	-	ENSG00000180592	3.34584
chr10	21807882	21808520	-	ENSG00000180592	6.08335
chr10	21962185	21962526	+	ENSG00000078403	2.09175
chr10	22610199	22610572	+	ENSG00000168283	2.32098
chr10	22825842	22826358	-	ENSG00000150867	6.01477
chr10	23410004	23410903	+	ENSG00000148450	20.0111
chr10	23728856	23729993	+	ENSG00000165312	28.4936
chr10	24762393	24762941	+	ENSG00000120549	19.2217
chr10	24832392	24833367	+	ENSG00000120549	5.37206
chr10	24873213	24875041	-	ENSG00000107863	38.361
chr10	24908632	24910258	-	ENSG00000107863	15.1297
chr10	25010674	25011004	-	ENSG00000107863	1.57942
chr10	25304812	25305163	-	ENSG00000151023	2.43334
chr10	25312127	25313126	+	ENSG00000185875	15.35
chr10	27323934	27324672	-	ENSG00000107890	5.39046
chr10	27443746	27444150	+	ENSG00000120539	4.8238
chr10	27458891	27459653	+	ENSG00000120539	7.73356
chr10	28821705	28821931	+	ENSG00000095787	2.06684
chr10	28884529	28884952	+	ENSG00000095787	4.0523
chr10	28908449	28908796	+	ENSG00000095787	3.49063
chr10	28966455	28966679	+	ENSG00000095739	6.08335
chr10	28970920	28971618	+	ENSG00000095739	19.5204
chr10	29812388	29812908	-	ENSG00000197321	3.21331
chr10	29821353	29821998	-	ENSG00000197321	5.91968
chr10	29839617	29840103	-	ENSG00000197321	4.9248
chr10	30303493	30303982	-	ENSG00000165757	6.76389
chr10	30306355	30307033	-	ENSG00000165757	5.16021
chr10	30314887	30316443	-	ENSG00000165757	9.85989
chr10	30316644	30317686	-	ENSG00000165757	10.6448
chr10	30317853	30318915	-	ENSG00000165757	8.24814
chr10	30336340	30336882	-	ENSG00000165757	6.30413
chr10	30602190	30602929	-	ENSG00000107951	20.1277
chr10	30727943	30728280	+	ENSG00000107968	6.29097
chr10	31133770	31134545	-	ENSG00000183621	15.4468
chr10	31137284	31139253	-	ENSG00000183621	5.99679
chr10	31809057	31809507	+	ENSG00000148516	2.28859
chr10	31810123	31810851	+	ENSG00000148516	14.1009
chr10	31815615	31816357	+	ENSG00000148516	11.0557
chr10	32197092	32197890	-	ENSG00000165322	10.3012
chr10	32560349	32561009	-	ENSG00000120616	16.0746
chr10	32573577	32573835	-	ENSG00000120616	2.03802
chr10	33468179	33469429	-	ENSG00000099250	27.0631
chr10	34399831	34400470	-	ENSG00000148498	15.6921
chr10	35298980	35299283	-	ENSG00000108094	2.86201
chr10	35857913	35858479	+	ENSG00000108100	4.35453
chr10	35927856	35928297	-	ENSG00000177283	4.41044
chr10	35928455	35929186	-	ENSG00000177283	9.85061
chr10	35929372	35929656	-	ENSG00000177283	2.65852
chr10	38091462	38092570	-	ENSG00000198105	16.7383
chr10	38352944	38353339	+	ENSG00000189180	10.5714
chr10	38406389	38408270	+	ENSG00000075407	12.6112
chr10	38411162	38412111	+	ENSG00000075407	8.96149
chr10	43078175	43078621	-	ENSG00000196693	6.08335
chr10	43291936	43292297	+	ENSG00000165733	2.23238
chr10	43650348	43650891	+	ENSG00000169826	6.80855
chr10	43678634	43679205	+	ENSG00000169826	5.81688
chr10	43882127	43883378	-	ENSG00000169813	10.9603
chr10	44052137	44053669	-	ENSG00000196793	13.7043
chr10	44111720	44112781	+	ENSG00000198298	9.29287
chr10	44139373	44140111	-	ENSG00000169740	2.13913
chr10	45489431	45490083	+	ENSG00000107551	7.27649
chr10	45495575	45495849	-	ENSG00000165511	3.08816
chr10	45498696	45499893	+	ENSG00000165512	4.28471
chr10	45500182	45500613	+	ENSG00000165512	5.91987
chr10	45953079	45954144	-	ENSG00000165406	8.57531
chr10	46121481	46122393	-	ENSG00000172671	12.9843
chr10	46284287	46284490	+	ENSG00000172661	1.54776
chr10	47219716	47220136	-	ENSG00000204172	37.7168
chr10	48236714	48237262	+	ENSG00000198035	4.86668
chr10	49658121	49659268	-	ENSG00000128805	27.7725
chr10	49863328	49864128	-	ENSG00000128805	25.5899
chr10	50190610	50190854	+	ENSG00000128815	2.95797
chr10	50226458	50227833	-	ENSG00000165633	20.0327
chr10	50362829	50364012	-	ENSG00000204161	11.552
chr10	50666771	50667403	-	ENSG00000225830	11.4705
chr10	50678225	50678752	-	ENSG00000225830	5.47744
chr10	50723390	50725323	-	ENSG00000258838	14.4904
chr10	50723390	50725323	-	ENSG00000243251	14.4904
chr10	50731971	50732657	-	ENSG00000225830	14.9566
chr10	50731971	50732657	-	ENSG00000258838	14.9566
chr10	50731971	50732657	-	ENSG00000243251	14.9566
chr10	51224770	51226168	-	ENSG00000174194	18.8378
chr10	51370878	51371282	-	ENSG00000174194	2.16661
chr10	51464138	51465847	-	ENSG00000204169	40.4543
chr10	51584883	51585389	+	ENSG00000138293	1.71903
chr10	51592242	51592448	-	ENSG00000138297	2.61452
chr10	51768778	51770182	+	ENSG00000204149	17.3614
chr10	52066622	52067066	-	ENSG00000198964	10.7024
chr10	52103259	52104173	-	ENSG00000198964	26.945
chr10	53457674	53459349	-	ENSG00000177613	16.4351
chr10	54053390	54054137	+	ENSG00000185532	1.58444
chr10	54076356	54076788	+	ENSG00000107984	3.47437
chr10	58117653	58118141	-	ENSG00000122952	4.14868
chr10	59955816	59956513	-	ENSG00000151151	18.2133
chr10	60588452	60588934	+	ENSG00000122870	9.92309
chr10	61412191	61412723	-	ENSG00000165449	1.69809
chr10	61413275	61414259	-	ENSG00000165449	8.18667
chr10	61548687	61549067	-	ENSG00000108091	2.95612
chr10	61789174	61789481	-	ENSG00000151150	3.1745
chr10	62648058	62648624	-	ENSG00000072422	4.97362
chr10	63170033	63170355	-	ENSG00000196932	5.17085
chr10	63850541	63853363	+	ENSG00000150347	15.477
chr10	64136118	64136658	+	ENSG00000138311	10.3417
chr10	64564775	64566019	+	ENSG00000181915	25.4241
chr10	64913348	64914314	+	ENSG00000148572	13.7002
chr10	64966381	64966724	-	ENSG00000171988	3.40448
chr10	64967372	64967574	-	ENSG00000171988	1.82882
chr10	64973284	64973758	-	ENSG00000171988	2.6148
chr10	69644456	69644655	+	ENSG00000096717	3.04167
chr10	69672298	69672912	+	ENSG00000096717	3.8579
chr10	69675910	69676429	+	ENSG00000096717	7.02607
chr10	69926153	69926352	+	ENSG00000138347	3.04167
chr10	69933815	69934240	+	ENSG00000138347	8.51669
chr10	70404683	70404898	+	ENSG00000138336	2.73751
chr10	70406433	70406641	+	ENSG00000138336	3.04167
chr10	70450686	70451571	+	ENSG00000138336	7.21477
chr10	70719572	70719947	+	ENSG00000165732	2.29349
chr10	70742266	70742669	+	ENSG00000165732	2.71886
chr10	70883274	70883622	+	ENSG00000122958	8.51669
chr10	70968388	70968773	+	ENSG00000156502	10.9768
chr10	71561627	71562469	+	ENSG00000197467	57.9516
chr10	71899006	71900077	-	ENSG00000156521	9.87183
chr10	71911936	71912468	-	ENSG00000079332	6.42255
chr10	72059358	72061081	-	ENSG00000172731	6.71782
chr10	72195070	72195591	-	ENSG00000156574	3.04167
chr10	72195070	72195591	+	ENSG00000197604	3.04167
chr10	72326293	72327731	+	ENSG00000107719	7.9509
chr10	72972370	72972669	+	ENSG00000107731	2.74052
chr10	73058849	73059108	+	ENSG00000107731	4.37204
chr10	73082529	73082954	+	ENSG00000198246	5.05883
chr10	73121869	73123041	+	ENSG00000198246	21.1566
chr10	73508609	73508943	-	ENSG00000107738	4.52111
chr10	73510125	73511064	-	ENSG00000107738	40.7117
chr10	73770011	73771401	+	ENSG00000122863	19.4155
chr10	73772379	73772867	+	ENSG00000122863	2.10123
chr10	73822361	73822616	-	ENSG00000107742	2.73751
chr10	74094022	74094556	-	ENSG00000148719	6.50472
chr10	74127514	74128131	-	ENSG00000107745	3.07335
chr10	75002755	75003008	+	ENSG00000138286	2.86793
chr10	75002755	75003008	-	ENSG00000213551	2.86793
chr10	75007106	75007332	-	ENSG00000213551	2.62948
chr10	75184269	75184507	-	ENSG00000166343	2.58061
chr10	75197746	75198234	-	ENSG00000107758	14.4322
chr10	75258172	75258975	-	ENSG00000166348	9.48396
chr10	75276223	75277246	-	ENSG00000166348	12.5415
chr10	75434136	75435426	-	ENSG00000172650	26.9067
chr10	75531452	75531829	+	ENSG00000176986	3.71993
chr10	75551723	75552368	+	ENSG00000214655	2.98617
chr10	75561293	75561506	-	ENSG00000166507	2.61392
chr10	75561293	75561506	+	ENSG00000214655	2.61392
chr10	75566948	75568558	-	ENSG00000166507	17.5879
chr10	75573387	75574257	-	ENSG00000148660	45.7101
chr10	75676238	75676744	+	ENSG00000122861	5.86932
chr10	75877844	75878314	+	ENSG00000035403	3.6066
chr10	76586413	76586620	+	ENSG00000156650	3.34584
chr10	76602370	76603154	+	ENSG00000156650	13.925
chr10	76781806	76782099	+	ENSG00000156650	3.33519
chr10	76788150	76789447	+	ENSG00000156650	6.59159
chr10	76789615	76791118	+	ENSG00000156650	52.24
chr10	76910147	76910835	+	ENSG00000156671	12.0576
chr10	77158036	77160249	-	ENSG00000165655	37.3985
chr10	77160687	77161066	-	ENSG00000165655	6.6064
chr10	79551365	79552299	-	ENSG00000151208	19.8293
chr10	79581060	79581929	-	ENSG00000151208	20.2857
chr10	79736921	79737338	-	ENSG00000148606	3.62106
chr10	79795225	79795631	+	ENSG00000138326	2.91492
chr10	81072343	81073730	+	ENSG00000108175	33.9466
chr10	81075024	81075434	+	ENSG00000108175	6.23486
chr10	81142160	81142722	-	ENSG00000165424	5.59817
chr10	81470321	81470520	+	ENSG00000188199	2.43334
chr10	81601443	81601664	+	ENSG00000228570	7.90835
chr10	81604082	81604282	+	ENSG00000228570	4.25834
chr10	81609543	81609991	+	ENSG00000228570	5.47501
chr10	81697477	81697852	-	ENSG00000133661	3.0353
chr10	81915466	81915696	-	ENSG00000122359	2.57911
chr10	84744779	84745477	+	ENSG00000185737	16.889
chr10	86130935	86132089	+	ENSG00000107771	7.97511
chr10	86273199	86274119	+	ENSG00000107771	13.8919
chr10	88259370	88260671	-	ENSG00000062650	19.5161
chr10	88277211	88277716	-	ENSG00000062650	4.72755
chr10	88280996	88281371	-	ENSG00000062650	1.5937
chr10	88701902	88704072	-	ENSG00000173269	40.4084
chr10	88911138	88911986	+	ENSG00000122376	5.01517
chr10	88912263	88912636	+	ENSG00000122376	3.0856
chr10	88992424	88992958	+	ENSG00000184923	6.06511
chr10	88993814	88994098	+	ENSG00000184923	30.4167
chr10	89117782	89118045	+	ENSG00000214562	3.04023
chr10	89264677	89265287	+	ENSG00000107789	3.71095
chr10	89311806	89312454	+	ENSG00000107789	4.49929
chr10	89312590	89312802	+	ENSG00000107789	1.75258
chr10	89622383	89622944	-	ENSG00000227268	5.64479
chr10	89725159	89725425	+	ENSG00000171862	2.07536
chr10	90750309	90750664	+	ENSG00000026103	4.6839
chr10	90773951	90774290	+	ENSG00000026103	6.74511
chr10	91065866	91066553	+	ENSG00000119922	4.04027
chr10	91066774	91067455	+	ENSG00000119922	23.4195
chr10	91098527	91100590	+	ENSG00000119917	9.87925
chr10	91162206	91162682	+	ENSG00000185745	7.60419
chr10	91177037	91178384	+	ENSG00000152778	14.02
chr10	91359055	91359426	-	ENSG00000152782	3.70981
chr10	91371403	91371803	-	ENSG00000152782	6.39803
chr10	91497083	91498274	+	ENSG00000138182	4.31561
chr10	92665131	92665335	+	ENSG00000148688	1.65442
chr10	92982415	92982646	+	ENSG00000180628	1.43999
chr10	93389722	93390404	-	ENSG00000119938	4.25834
chr10	93667586	93668295	-	ENSG00000174721	12.3323
chr10	93999539	93999899	-	ENSG00000107864	5.48323
chr10	94448342	94449390	+	ENSG00000152804	5.696
chr10	94454414	94454668	+	ENSG00000152804	2.22419
chr10	94833339	94833747	+	ENSG00000095596	5.77918
chr10	95462075	95462274	-	ENSG00000148690	1.66582
chr10	96162017	96163321	+	ENSG00000108239	8.10702
chr10	96290969	96291356	+	ENSG00000108239	2.63193
chr10	97073548	97073845	-	ENSG00000095637	3.89211
chr10	97423208	97424092	-	ENSG00000119977	5.62851
chr10	97626148	97626651	+	ENSG00000138185	3.26047
chr10	97627291	97627578	+	ENSG00000138185	2.58026
chr10	97817573	97818377	+	ENSG00000107443	18.0914
chr10	98714603	98716164	+	ENSG00000196233	10.5078
chr10	98740866	98742041	+	ENSG00000155640	5.11842
chr10	98742632	98743167	+	ENSG00000155640	3.09265
chr10	98743422	98743728	+	ENSG00000155640	3.62819
chr10	98744270	98745357	+	ENSG00000155640	5.98814
chr10	99092817	99093953	-	ENSG00000181274	51.0268
chr10	99116499	99117083	-	ENSG00000052749	12.6089
chr10	99216463	99217036	+	ENSG00000171307	12.4947
chr10	99329889	99330600	+	ENSG00000165886	13.0222
chr10	99374472	99374688	-	ENSG00000171160	2.6283
chr10	99375730	99376149	-	ENSG00000171160	7.37144
chr10	99437291	99437752	-	ENSG00000119986	5.90966
chr10	99519144	99519552	+	ENSG00000155256	5.88894
chr10	99967912	99968543	+	ENSG00000166024	6.90827
chr10	99969163	99969590	+	ENSG00000166024	5.04528
chr10	100176074	100176485	-	ENSG00000107521	4.05351
chr10	101157106	101157428	-	ENSG00000120053	3.80107
chr10	101292743	101293053	+	ENSG00000119919	3.04167
chr10	101295339	101295954	+	ENSG00000119919	4.56251
chr10	101370444	101371256	-	ENSG00000155287	19.1532
chr10	101464235	101464948	+	ENSG00000198018	10.4701
chr10	101515419	101515705	+	ENSG00000119929	3.18617
chr10	101636369	101637260	-	ENSG00000107554	8.4266
chr10	101639458	101640011	-	ENSG00000107554	3.05863
chr10	101714977	101716833	-	ENSG00000107554	5.97547
chr10	102246529	102246983	-	ENSG00000075826	8.30821
chr10	102307777	102308121	+	ENSG00000166135	6.41417
chr10	102676686	102676887	+	ENSG00000119906	2.42811
chr10	102683777	102684544	+	ENSG00000119906	3.70262
chr10	102732402	102732633	+	ENSG00000095539	3.14525
chr10	102763392	102764080	+	ENSG00000107816	1.39496
chr10	102765123	102765584	+	ENSG00000107816	1.9329
chr10	102766259	102767308	+	ENSG00000107816	10.5617
chr10	102778632	102778933	-	ENSG00000186862	4.61746
chr10	103312845	103313483	+	ENSG00000166167	7.70676
chr10	103313649	103313848	+	ENSG00000166167	2.237
chr10	103454302	103454895	-	ENSG00000107829	33.4728
chr10	103558626	103559196	-	ENSG00000198408	11.9567
chr10	103577576	103578169	-	ENSG00000198408	8.93383
chr10	103607133	103607362	-	ENSG00000120029	3.61177
chr10	103825538	103827789	+	ENSG00000166189	38.6855
chr10	103867411	103868231	-	ENSG00000198728	17.5862
chr10	103874400	103874649	-	ENSG00000198728	1.79695
chr10	103899000	103900781	+	ENSG00000148840	20.0531
chr10	103901163	103901694	+	ENSG00000148840	3.37842
chr10	103906493	103907115	+	ENSG00000148840	19.0865
chr10	104142239	104142444	+	ENSG00000107862	1.71895
chr10	104240189	104240895	-	ENSG00000138107	8.8433
chr10	104389777	104390495	+	ENSG00000107882	22.6794
chr10	104391318	104392095	+	ENSG00000107882	5.99048
chr10	104416745	104417194	+	ENSG00000171206	4.22663
chr10	104572497	104573632	+	ENSG00000166272	10.388
chr10	104573851	104574144	+	ENSG00000166272	2.18722
chr10	104574333	104575898	+	ENSG00000166272	9.13605
chr10	104678388	104678728	+	ENSG00000148842	5.48104
chr10	104679085	104679998	+	ENSG00000148842	30.7542
chr10	104836632	104838198	+	ENSG00000148842	17.4289
chr10	104849343	104849618	-	ENSG00000076685	1.60959
chr10	105127864	105128096	+	ENSG00000148835	2.84312
chr10	105147788	105148226	+	ENSG00000148835	3.05703
chr10	105184730	105185286	+	ENSG00000148843	10.8318
chr10	105726960	105727162	+	ENSG00000065613	3.76057
chr10	105762005	105763311	+	ENSG00000065613	2.72053
chr10	106072238	106072495	-	ENSG00000148841	2.32337
chr10	106072875	106075786	-	ENSG00000148841	19.7122
chr10	112269787	112271125	+	ENSG00000138166	21.7499
chr10	112723937	112724829	+	ENSG00000108061	16.3984
chr10	113912806	113913492	-	ENSG00000119927	6.26953
chr10	115489878	115490321	+	ENSG00000165806	8.68346
chr10	115608878	115609175	-	ENSG00000198924	4.2092
chr10	115609802	115610207	-	ENSG00000198924	4.70343
chr10	115612520	115612990	-	ENSG00000198924	6.81455
chr10	115613199	115613908	-	ENSG00000198924	4.40394
chr10	115614458	115614709	+	ENSG00000196865	6.07765
chr10	115636324	115636718	+	ENSG00000196865	4.90941
chr10	115922425	115923043	-	ENSG00000165813	10.8791
chr10	116195400	116196064	-	ENSG00000099204	2.73401
chr10	116621075	116621662	+	ENSG00000151553	4.2509
chr10	118645748	118646115	-	ENSG00000187164	2.6696
chr10	119042624	119044912	-	ENSG00000165650	11.2266
chr10	119798397	119798974	-	ENSG00000107560	9.81411
chr10	119799475	119800073	-	ENSG00000107560	7.51402
chr10	120445274	120445784	-	ENSG00000151893	9.26439
chr10	120514070	120514442	-	ENSG00000151893	2.77832
chr10	120801361	120802434	-	ENSG00000107581	12.4797
chr10	120895928	120896530	+	ENSG00000119979	2.58184
chr10	120967246	120967471	+	ENSG00000198873	1.7053
chr10	121214576	121214983	+	ENSG00000198873	3.53915
chr10	121586302	121587222	+	ENSG00000198825	3.4812
chr10	121657791	121658314	+	ENSG00000107651	7.09218
chr10	122348843	122349264	+	ENSG00000203805	3.24756
chr10	122357672	122358497	+	ENSG00000177234	9.12502
chr10	123969975	123971214	+	ENSG00000138162	29.6689
chr10	124189004	124189605	+	ENSG00000107679	20.3077
chr10	124273611	124274269	+	ENSG00000166033	8.39659
chr10	124591814	124592013	-	ENSG00000138161	2.19216
chr10	124691845	124692225	-	ENSG00000119965	13.2158
chr10	124697050	124697797	-	ENSG00000119965	10.1759
chr10	124753449	124754183	-	ENSG00000095574	20.6325
chr10	124814670	124814878	+	ENSG00000196177	2.18172
chr10	124815715	124816159	+	ENSG00000196177	5.0618
chr10	124816379	124816738	+	ENSG00000196177	5.59549
chr10	125767734	125769773	-	ENSG00000182022	11.659
chr10	126370031	126370949	-	ENSG00000189319	14.6145
chr10	126370031	126370949	-	ENSG00000258539	14.6145
chr10	126523015	126523838	+	ENSG00000165660	27.939
chr10	126631049	126632007	+	ENSG00000019995	15.0762
chr10	126673368	126673932	+	ENSG00000019995	8.61339
chr10	126677427	126678347	-	ENSG00000175029	16.2165
chr10	127525171	127525410	-	ENSG00000089876	2.54958
chr10	127548260	127548617	-	ENSG00000089876	4.10055
chr10	129881803	129882126	+	ENSG00000132334	2.37482
chr10	129896032	129897692	-	ENSG00000148773	23.0729
chr10	129899351	129900030	-	ENSG00000148773	7.04904
chr10	129900731	129901792	-	ENSG00000148773	3.10246
chr10	129901959	129904066	-	ENSG00000148773	8.09109
chr10	129904277	129907662	-	ENSG00000148773	6.35123
chr10	129911633	129911961	-	ENSG00000148773	1.17958
chr10	129913111	129914295	-	ENSG00000148773	10.6614
chr10	129924369	129924620	-	ENSG00000148773	3.84933
chr10	131635831	131636354	-	ENSG00000108001	6.85299
chr10	133769112	133769857	+	ENSG00000175470	24.519
chr10	134018685	134019178	+	ENSG00000151640	2.70765
chr10	134021189	134021630	-	ENSG00000165752	12.0552
chr10	134161406	134161918	+	ENSG00000148814	9.69205
chr10	134188631	134188888	+	ENSG00000148814	4.56251
chr10	134218045	134220501	+	ENSG00000171813	49.0378
chr10	134230369	134231118	+	ENSG00000171813	4.50762
chr10	134999908	135000197	+	ENSG00000171798	3.34584
chr10	135192887	135193105	+	ENSG00000148832	4.40838
chr10	135193519	135194180	+	ENSG00000148832	8.68048
chr10	135234288	135234562	-	ENSG00000203772	1.62027
chr10	135235743	135236021	-	ENSG00000203772	2.50954
chr11	207585	208618	+	ENSG00000177963	17.644
chr11	209638	210097	+	ENSG00000177963	5.63234
chr11	214129	214944	+	ENSG00000177963	4.96996
chr11	215625	216779	-	ENSG00000142082	19.5785
chr11	218650	219023	-	ENSG00000142082	7.44531
chr11	294414	295684	+	ENSG00000142102	25.7167
chr11	376603	377653	+	ENSG00000182272	37.633
chr11	490920	491373	+	ENSG00000174915	3.87745
chr11	532265	532730	-	ENSG00000174775	13.6651
chr11	553997	554332	+	ENSG00000161328	6.69168
chr11	562306	562676	+	ENSG00000099849	2.14015
chr11	607106	609516	+	ENSG00000070047	15.2473
chr11	611556	611998	+	ENSG00000070047	3.53482
chr11	644249	644708	-	ENSG00000177030	23.203
chr11	727408	727607	+	ENSG00000177106	2.43334
chr11	787737	788548	-	ENSG00000184524	5.96031
chr11	831537	831926	+	ENSG00000177685	3.80327
chr11	1010545	1011590	+	ENSG00000183020	11.3956
chr11	1297046	1297838	-	ENSG00000078902	4.26292
chr11	1298120	1298518	-	ENSG00000078902	6.52069
chr11	1578282	1579037	-	ENSG00000184545	8.56681
chr11	1618663	1619219	-	ENSG00000205867	2.73751
chr11	1756092	1756480	-	ENSG00000244242	6.88809
chr11	2152662	2153448	-	ENSG00000167244	6.57072
chr11	2909251	2909933	-	ENSG00000254827	4.89874
chr11	2950193	2950523	-	ENSG00000181649	3.15956
chr11	3688412	3688843	-	ENSG00000129749	3.34584
chr11	3697250	3697764	-	ENSG00000110713	4.62606
chr11	3847109	3847348	+	ENSG00000148985	2.57743
chr11	3848284	3849512	-	ENSG00000177105	16.7279
chr11	4112645	4112880	+	ENSG00000167323	2.44105
chr11	4621489	4621985	-	ENSG00000167333	8.95258
chr11	4626443	4626766	-	ENSG00000167333	4.33412
chr11	5535789	5536078	-	ENSG00000175518	3.95418
chr11	5536280	5536492	-	ENSG00000175518	3.1745
chr11	5536764	5537133	-	ENSG00000175518	2.88591
chr11	5537311	5537809	-	ENSG00000175518	5.47501
chr11	5653488	5653923	+	ENSG00000258588	3.63075
chr11	5653488	5653923	+	ENSG00000258659	3.63075
chr11	5701142	5701459	-	ENSG00000132256	2.2074
chr11	5717657	5717997	+	ENSG00000132274	1.81856
chr11	6232657	6232971	-	ENSG00000051009	5.38468
chr11	6238594	6239347	-	ENSG00000051009	22.556
chr11	6265351	6265563	+	ENSG00000132259	2.73751
chr11	6411737	6412299	+	ENSG00000166311	3.94516
chr11	6412629	6413298	+	ENSG00000166311	12.1342
chr11	6415960	6416159	+	ENSG00000166311	2.26703
chr11	6431810	6432646	-	ENSG00000166313	7.83868
chr11	6469942	6470344	-	ENSG00000110171	9.14145
chr11	6477657	6478243	-	ENSG00000110171	3.27028
chr11	6497836	6498508	-	ENSG00000132254	3.72353
chr11	6555143	6555541	+	ENSG00000179532	4.76655
chr11	6568163	6568647	+	ENSG00000179532	4.99448
chr11	6578069	6579231	+	ENSG00000179532	11.1971
chr11	6591784	6593139	+	ENSG00000179532	15.7049
chr11	6622391	6623131	-	ENSG00000132275	5.51263
chr11	6642620	6645992	-	ENSG00000166341	21.0814
chr11	6647859	6648870	-	ENSG00000166341	8.47779
chr11	6651493	6652292	-	ENSG00000166341	11.1052
chr11	6653507	6654339	-	ENSG00000166341	4.88712
chr11	6661008	6662941	-	ENSG00000166341	31.7049
chr11	6676598	6677069	-	ENSG00000166341	10.3417
chr11	6703205	6703594	-	ENSG00000158042	5.77032
chr11	6947716	6948001	+	ENSG00000149054	3.96565
chr11	6953404	6953963	+	ENSG00000149054	5.1837
chr11	6976835	6978396	+	ENSG00000149054	9.57603
chr11	7021889	7022831	-	ENSG00000149050	16.1209
chr11	7041341	7041540	-	ENSG00000149050	2.73751
chr11	7063816	7064672	+	ENSG00000158077	3.65001
chr11	7110199	7110615	+	ENSG00000170748	3.95418
chr11	7110990	7111598	+	ENSG00000170748	5.47501
chr11	7674198	7674973	+	ENSG00000166387	24.0594
chr11	8021699	8022048	+	ENSG00000175390	7.1998
chr11	8661834	8662284	-	ENSG00000166436	3.08804
chr11	8710287	8710551	+	ENSG00000166441	2.36035
chr11	8751688	8752460	-	ENSG00000166444	12.3922
chr11	8969671	8969897	-	ENSG00000175348	2.8081
chr11	9225219	9225828	-	ENSG00000184014	9.30491
chr11	9302274	9302528	-	ENSG00000166471	4.74019
chr11	9466652	9467082	+	ENSG00000205339	2.87773
chr11	9595363	9595931	+	ENSG00000166483	5.16698
chr11	9771290	9771782	+	ENSG00000133789	1.90002
chr11	9800944	9801875	-	ENSG00000133812	7.38835
chr11	10580178	10580723	-	ENSG00000133800	2.08485
chr11	10597484	10598150	-	ENSG00000072952	32.4167
chr11	10800140	10800594	+	ENSG00000198730	4.5754
chr11	11963891	11964673	+	ENSG00000170242	20.1235
chr11	11977486	11978347	+	ENSG00000170242	13.9862
chr11	11984786	11985096	-	ENSG00000050165	3.14482
chr11	12315916	12316396	+	ENSG00000133808	7.30002
chr11	12379820	12380459	+	ENSG00000133808	11.2551
chr11	12696027	12696562	+	ENSG00000187079	7.26204
chr11	12958658	12958915	+	ENSG00000187079	2.86821
chr11	12963909	12964233	+	ENSG00000187079	2.98568
chr11	13410304	13410653	-	ENSG00000148925	2.93166
chr11	14665333	14666267	+	ENSG00000152270	2.65362
chr11	14891077	14891655	+	ENSG00000152270	13.1654
chr11	14912401	14913530	-	ENSG00000186104	20.776
chr11	16847575	16848138	-	ENSG00000166689	16.1883
chr11	17111097	17111376	-	ENSG00000011405	2.52202
chr11	17190352	17191389	-	ENSG00000011405	5.5162
chr11	17809718	17809952	-	ENSG00000129158	3.00175
chr11	18312998	18313596	-	ENSG00000110756	3.15082
chr11	18387362	18387787	+	ENSG00000110768	5.54557
chr11	18636533	18636986	-	ENSG00000179119	3.12761
chr11	19250812	19251378	-	ENSG00000129173	4.26913
chr11	19954679	19955814	+	ENSG00000166833	12.5875
chr11	20066683	20067023	+	ENSG00000166833	2.51568
chr11	20139649	20140445	+	ENSG00000166833	38.8074
chr11	20140860	20141436	+	ENSG00000166833	6.78566
chr11	22301551	22301960	+	ENSG00000171714	3.92038
chr11	22646241	22647102	-	ENSG00000183161	11.6657
chr11	27389370	27389876	-	ENSG00000205213	13.075
chr11	27494044	27494317	-	ENSG00000205213	10.95
chr11	27677477	27677905	-	ENSG00000176697	6.06041
chr11	27679307	27680244	-	ENSG00000176697	20.1538
chr11	28057704	28058136	-	ENSG00000121621	8.81912
chr11	30352335	30352904	+	ENSG00000152219	7.99313
chr11	30357996	30358300	+	ENSG00000152219	3.82611
chr11	31808734	31808947	-	ENSG00000007372	2.46854
chr11	32953197	32953659	+	ENSG00000060749	10.9541
chr11	32954966	32955413	+	ENSG00000060749	4.57738
chr11	32956255	32957060	+	ENSG00000060749	15.1788
chr11	32975215	32975766	+	ENSG00000060749	3.92346
chr11	33279263	33279536	+	ENSG00000110422	3.14014
chr11	33307857	33308849	+	ENSG00000110422	3.94183
chr11	33374667	33374988	+	ENSG00000110422	3.13628
chr11	33563346	33566009	+	ENSG00000110427	14.7891
chr11	33566324	33566806	+	ENSG00000110427	18.054
chr11	33689375	33690392	+	ENSG00000110427	16.1172
chr11	33690638	33691421	+	ENSG00000110427	11.4558
chr11	33692162	33692537	+	ENSG00000110427	3.02423
chr11	33693893	33694303	+	ENSG00000110427	5.69176
chr11	33880482	33881155	-	ENSG00000135363	4.39873
chr11	33891093	33891456	-	ENSG00000135363	2.49035
chr11	34167541	34168050	+	ENSG00000135372	4.91047
chr11	34378823	34379529	-	ENSG00000166016	6.92618
chr11	35250720	35250928	+	ENSG00000026508	1.85026
chr11	35453724	35454338	-	ENSG00000149090	4.56251
chr11	35684482	35685240	+	ENSG00000166326	5.37185
chr11	36511255	36512226	-	ENSG00000175104	14.6311
chr11	36595215	36595813	+	ENSG00000166349	4.04987
chr11	36596326	36597956	+	ENSG00000166349	13.6994
chr11	40135863	40137108	-	ENSG00000148948	9.42919
chr11	40137317	40137516	-	ENSG00000148948	3.04167
chr11	44105201	44105654	+	ENSG00000110455	7.72952
chr11	44129236	44129829	+	ENSG00000151348	7.65809
chr11	44265724	44266394	+	ENSG00000151348	7.04706
chr11	44640728	44640990	+	ENSG00000085117	1.53059
chr11	44950573	44952132	+	ENSG00000157570	13.8
chr11	45246044	45246277	+	ENSG00000019485	3.04167
chr11	45670752	45672844	-	ENSG00000175264	21.1132
chr11	45927519	45927965	+	ENSG00000121653	3.73216
chr11	45931240	45931817	-	ENSG00000121680	21.2638
chr11	45955125	45955832	-	ENSG00000135365	31.2451
chr11	46342385	46342685	+	ENSG00000157613	3.25283
chr11	46418135	46419465	-	ENSG00000110497	18.6499
chr11	46563495	46564869	-	ENSG00000110497	9.34907
chr11	46636972	46637927	-	ENSG00000180423	14.1556
chr11	46693923	46694494	+	ENSG00000175224	2.53033
chr11	46694817	46695080	+	ENSG00000175224	1.44427
chr11	46699970	46700585	-	ENSG00000175220	2.65847
chr11	46726007	46727450	+	ENSG00000175213	13.2561
chr11	46879932	46880807	-	ENSG00000134569	12.3875
chr11	47183059	47183668	+	ENSG00000149179	7.79553
chr11	47199111	47199559	-	ENSG00000165912	4.2803
chr11	47260339	47260734	+	ENSG00000134574	3.22855
chr11	47260886	47261753	-	ENSG00000134575	16.4428
chr11	47289869	47290380	+	ENSG00000025434	10.563
chr11	47296326	47296583	+	ENSG00000110514	4.4312
chr11	47460346	47460584	-	ENSG00000165917	3.63551
chr11	47592932	47593399	+	ENSG00000213619	4.36814
chr11	47594598	47595365	-	ENSG00000123444	10.0397
chr11	47599108	47599643	+	ENSG00000231880	5.8624
chr11	47599108	47599643	-	ENSG00000123444	5.8624
chr11	47600296	47600495	-	ENSG00000123444	2.26786
chr11	47611239	47611651	-	ENSG00000172247	3.04167
chr11	47800433	47800818	-	ENSG00000030066	5.80768
chr11	57003401	57004423	-	ENSG00000134817	10.4973
chr11	57075875	57078048	-	ENSG00000149115	52.1486
chr11	57079856	57081220	-	ENSG00000149115	11.3903
chr11	57087799	57088188	-	ENSG00000149115	3.14118
chr11	57174544	57175345	-	ENSG00000134802	5.99894
chr11	57243604	57244842	+	ENSG00000186907	20.4785
chr11	57252255	57252703	-	ENSG00000149150	11.0817
chr11	57319576	57319994	-	ENSG00000156587	3.08171
chr11	57426969	57427276	+	ENSG00000172409	5.24442
chr11	57428155	57429235	+	ENSG00000172409	25.5691
chr11	57435329	57435852	+	ENSG00000156599	8.25547
chr11	57439364	57440169	+	ENSG00000156599	9.78412
chr11	57466276	57466990	+	ENSG00000156599	2.89893
chr11	57467272	57467848	+	ENSG00000156599	16.3914
chr11	57563762	57564521	+	ENSG00000198561	10.4745
chr11	57569102	57569657	+	ENSG00000198561	2.49381
chr11	57583730	57583995	+	ENSG00000198561	1.66927
chr11	57584168	57584502	+	ENSG00000198561	2.04788
chr11	58346607	58346911	+	ENSG00000186660	4.63588
chr11	58346607	58346911	+	ENSG00000255073	4.63588
chr11	58384749	58385456	+	ENSG00000186660	22.5421
chr11	58891801	58893132	+	ENSG00000189057	7.1684
chr11	58893273	58893477	+	ENSG00000189057	2.41552
chr11	58893800	58894894	+	ENSG00000189057	29.2487
chr11	58919189	58920664	+	ENSG00000166801	13.2512
chr11	58949457	58949836	+	ENSG00000110042	5.17085
chr11	59343229	59343437	-	ENSG00000110048	1.59169
chr11	59573733	59574216	-	ENSG00000166902	10.8205
chr11	60617931	60618374	+	ENSG00000110104	1.39719
chr11	60658248	60658504	-	ENSG00000110107	4.45725
chr11	60703744	60704614	+	ENSG00000006118	11.4862
chr11	61025812	61026783	-	ENSG00000167992	14.101
chr11	61165735	61166189	+	ENSG00000187049	7.10162
chr11	61170476	61171131	-	ENSG00000149532	14.5137
chr11	61171925	61172310	-	ENSG00000149532	4.76231
chr11	61213327	61213940	+	ENSG00000167985	14.4172
chr11	61510970	61512276	+	ENSG00000134780	26.1672
chr11	61513818	61514122	+	ENSG00000134780	2.51383
chr11	61553799	61554227	+	ENSG00000124920	2.83362
chr11	61562820	61564599	+	ENSG00000168496	13.7767
chr11	61664797	61665901	-	ENSG00000167994	12.8962
chr11	61725649	61725848	+	ENSG00000167995	2.56601
chr11	61897646	61897968	+	ENSG00000149503	4.4494
chr11	61919059	61919469	+	ENSG00000149503	2.89685
chr11	62159931	62160526	+	ENSG00000162174	4.81522
chr11	62342816	62343253	-	ENSG00000149016	2.35344
chr11	62382851	62383250	-	ENSG00000149541	6.19947
chr11	62414936	62417451	-	ENSG00000185085	17.9832
chr11	62430416	62430778	-	ENSG00000162194	2.01312
chr11	62434720	62434977	+	ENSG00000214756	2.06963
chr11	62482244	62482537	-	ENSG00000214753	5.80051
chr11	62493978	62494927	-	ENSG00000214753	11.5324
chr11	62493978	62494927	-	ENSG00000234857	11.5324
chr11	62539243	62539442	-	ENSG00000168569	1.77163
chr11	62553643	62554819	+	ENSG00000162227	12.0143
chr11	62655824	62656208	+	ENSG00000168003	11.6961
chr11	63486240	63487222	+	ENSG00000133318	11.1841
chr11	63487377	63488577	+	ENSG00000133318	7.13
chr11	63676301	63676909	+	ENSG00000072518	14.6847
chr11	63722016	63722829	+	ENSG00000110583	27.0621
chr11	63933045	63933449	-	ENSG00000133315	3.11022
chr11	63993873	63994675	+	ENSG00000149761	3.11008
chr11	64005810	64006244	+	ENSG00000173511	7.30639
chr11	64083230	64083623	+	ENSG00000173153	2.05827
chr11	64124591	64124914	+	ENSG00000168071	3.00812
chr11	64533314	64533608	-	ENSG00000168066	3.14285
chr11	64571595	64572263	-	ENSG00000133895	7.6015
chr11	64621074	64622318	-	ENSG00000110047	27.4911
chr11	64692195	64692642	+	ENSG00000068971	4.16306
chr11	64692811	64693265	+	ENSG00000068971	7.49759
chr11	64755576	64756055	-	ENSG00000168062	4.66547
chr11	64756972	64757278	-	ENSG00000168062	6.38752
chr11	64811708	64812305	+	ENSG00000168061	86.7875
chr11	64878870	64879079	+	ENSG00000149823	3.99382
chr11	64883896	64884329	-	ENSG00000174276	6.25523
chr11	64895225	64895636	-	ENSG00000162298	5.46083
chr11	64978861	64979447	+	ENSG00000014216	6.09577
chr11	65064680	65065032	+	ENSG00000014138	4.39448
chr11	65123489	65123892	+	ENSG00000173825	2.52123
chr11	65142781	65143058	-	ENSG00000162241	4.2834
chr11	65143749	65144486	-	ENSG00000162241	7.90848
chr11	65178572	65180225	+	ENSG00000126391	12.2417
chr11	65306292	65306664	-	ENSG00000168056	3.57224
chr11	65340876	65341457	+	ENSG00000176973	5.02298
chr11	65349135	65349427	+	ENSG00000173442	1.94296
chr11	65365242	65366149	-	ENSG00000173327	23.9889
chr11	65380795	65381163	-	ENSG00000173327	2.91452
chr11	65381294	65381786	-	ENSG00000173327	3.34808
chr11	65385442	65387018	+	ENSG00000197136	49.2278
chr11	65408290	65409050	+	ENSG00000213445	11.2174
chr11	65486226	65486919	-	ENSG00000172922	5.87403
chr11	65544909	65547512	-	ENSG00000254470	35.3646
chr11	65658177	65659153	+	ENSG00000175602	20.0249
chr11	65659370	65660460	-	ENSG00000175592	4.06872
chr11	65684343	65685787	-	ENSG00000175573	19.3324
chr11	65765807	65766243	-	ENSG00000175376	8.70659
chr11	66099605	66100034	-	ENSG00000174791	4.6948
chr11	66102164	66102565	-	ENSG00000174791	5.45145
chr11	66113037	66113646	-	ENSG00000174684	11.9396
chr11	66114033	66114956	-	ENSG00000174684	6.24565
chr11	66130124	66131104	-	ENSG00000174669	5.77918
chr11	66242972	66244042	+	ENSG00000174516	9.08251
chr11	66244374	66244743	+	ENSG00000174516	1.59951
chr11	66288263	66288738	-	ENSG00000174165	3.13943
chr11	66357827	66358026	-	ENSG00000182791	2.12917
chr11	66358173	66358649	-	ENSG00000182791	3.34584
chr11	66359339	66359538	-	ENSG00000182791	2.43334
chr11	66384150	66384710	+	ENSG00000239306	5.23989
chr11	66384150	66384710	+	ENSG00000248643	5.23989
chr11	66391549	66392157	+	ENSG00000239306	6.94462
chr11	66410790	66411331	+	ENSG00000173933	4.94558
chr11	66410790	66411331	+	ENSG00000248643	4.94558
chr11	66435937	66436888	-	ENSG00000173914	21.5075
chr11	66452948	66453512	-	ENSG00000173898	8.07702
chr11	66458752	66459279	-	ENSG00000173898	7.69083
chr11	66468010	66468764	-	ENSG00000173898	17.4277
chr11	66472099	66472569	-	ENSG00000173898	1.76883
chr11	66613446	66613799	+	ENSG00000173653	2.56886
chr11	66624730	66626753	+	ENSG00000173621	28.0142
chr11	66839082	66839347	+	ENSG00000173156	1.99936
chr11	66886658	66887017	+	ENSG00000173120	7.654
chr11	66998939	66999406	+	ENSG00000173120	6.39478
chr11	67022354	67022595	+	ENSG00000173120	2.05528
chr11	67024417	67025019	+	ENSG00000173120	3.90756
chr11	67069598	67069950	+	ENSG00000172932	5.2421
chr11	67119032	67119337	-	ENSG00000175482	7.08525
chr11	67132535	67133280	-	ENSG00000175505	14.3945
chr11	67165015	67165310	+	ENSG00000172613	3.15474
chr11	67177106	67177450	+	ENSG00000175463	2.56601
chr11	67203059	67203643	-	ENSG00000213402	4.55548
chr11	67220034	67220300	-	ENSG00000175514	3.33255
chr11	67259411	67259776	-	ENSG00000110697	4.13368
chr11	67820386	67821095	-	ENSG00000110721	2.79149
chr11	67821253	67821513	-	ENSG00000110721	4.63361
chr11	68115331	68115815	+	ENSG00000162337	4.60343
chr11	68153730	68154249	+	ENSG00000162337	3.68457
chr11	68181173	68181478	+	ENSG00000162337	5.24826
chr11	68216201	68216546	+	ENSG00000162337	4.95761
chr11	68703678	68704440	+	ENSG00000132740	4.42819
chr11	68707105	68707903	+	ENSG00000132740	10.8657
chr11	68855333	68855876	+	ENSG00000162341	7.57422
chr11	69182154	69182616	+	ENSG00000172927	9.91885
chr11	69465898	69466175	+	ENSG00000110092	1.75286
chr11	70049546	70050035	+	ENSG00000168040	2.94814
chr11	70052210	70053397	+	ENSG00000168040	14.3585
chr11	70281511	70281818	+	ENSG00000085733	2.84766
chr11	71145645	71146720	-	ENSG00000172893	2.24944
chr11	71507077	71508235	+	ENSG00000158483	8.63111
chr11	71707120	71708265	+	ENSG00000137522	18.343
chr11	71723955	71725784	-	ENSG00000137497	18.8752
chr11	71725997	71727160	-	ENSG00000137497	4.4083
chr11	72145259	72145497	-	ENSG00000162129	4.50271
chr11	72465795	72466174	-	ENSG00000214530	10.157
chr11	72491924	72492190	-	ENSG00000214530	1.57541
chr11	72548549	72548942	-	ENSG00000137478	4.87953
chr11	72549075	72549913	-	ENSG00000137478	4.88141
chr11	72945785	72947007	+	ENSG00000175591	11.8625
chr11	73019986	73022919	+	ENSG00000110237	20.3703
chr11	73078474	73079403	+	ENSG00000110237	26.6597
chr11	73106327	73106799	+	ENSG00000054967	1.94814
chr11	73113583	73114060	-	ENSG00000054965	5.2821
chr11	73115851	73116653	-	ENSG00000054965	18.6516
chr11	73583891	73584527	-	ENSG00000181924	12.9416
chr11	73638395	73638735	+	ENSG00000175575	9.71649
chr11	73711410	73712517	-	ENSG00000175564	15.2953
chr11	73720174	73720525	-	ENSG00000175564	7.05576
chr11	73744257	73744595	-	ENSG00000168014	2.77662
chr11	73744804	73745291	-	ENSG00000168014	4.47351
chr11	73789041	73789443	-	ENSG00000168014	1.65127
chr11	74047531	74047828	-	ENSG00000165434	2.6731
chr11	74202976	74203381	-	ENSG00000175536	8.73825
chr11	74459928	74460162	+	ENSG00000166439	7.60419
chr11	74546648	74547849	+	ENSG00000166439	10.6557
chr11	74553081	74555199	-	ENSG00000166435	14.0985
chr11	74617286	74617502	-	ENSG00000166435	2.5087
chr11	74716470	74718458	+	ENSG00000162139	36.4003
chr11	74953399	74953598	+	ENSG00000261594	2.12917
chr11	74976217	74977428	-	ENSG00000137486	38.7569
chr11	75145705	75146594	-	ENSG00000158555	3.65454
chr11	75277352	75277804	+	ENSG00000149257	1.88201
chr11	75282811	75283781	+	ENSG00000149257	3.14797
chr11	75379790	75380113	-	ENSG00000171533	3.04167
chr11	75851664	75852692	+	ENSG00000198382	16.2991
chr11	76114664	76115037	+	ENSG00000179240	1.76176
chr11	76122391	76122590	+	ENSG00000179240	2.12917
chr11	76123064	76123513	+	ENSG00000179240	2.73751
chr11	76255183	76255864	+	ENSG00000158636	14.0795
chr11	76260948	76261604	+	ENSG00000158636	16.0672
chr11	76370156	76372468	-	ENSG00000137507	35.5215
chr11	76813526	76814409	+	ENSG00000254550	3.65001
chr11	77034031	77034292	-	ENSG00000149269	4.29507
chr11	77377841	77378610	-	ENSG00000048649	28.7065
chr11	77412093	77412339	-	ENSG00000048649	2.04228
chr11	77920513	77921942	+	ENSG00000118369	10.9306
chr11	77929072	77930384	-	ENSG00000033327	13.0086
chr11	77937567	77937999	-	ENSG00000033327	3.2254
chr11	78364552	78364751	-	ENSG00000149256	1.825
chr11	78369016	78369732	-	ENSG00000149256	24.3334
chr11	78380038	78380870	-	ENSG00000149256	6.69168
chr11	78381152	78381607	-	ENSG00000149256	9.12502
chr11	78412577	78413440	-	ENSG00000149256	6.99585
chr11	82443370	82444029	-	ENSG00000182103	5.77918
chr11	82444595	82444799	-	ENSG00000182103	3.04167
chr11	82692678	82693528	-	ENSG00000137502	25.3702
chr11	82868200	82868645	+	ENSG00000165494	11.2891
chr11	82876701	82877393	+	ENSG00000165494	4.80822
chr11	82879416	82879983	+	ENSG00000165494	6.64111
chr11	82880404	82881041	+	ENSG00000165494	19.0468
chr11	82904949	82905739	+	ENSG00000137494	4.57305
chr11	85779832	85780127	-	ENSG00000073921	8.91994
chr11	86656894	86657105	-	ENSG00000174804	1.96511
chr11	86661820	86663727	-	ENSG00000174804	13.4631
chr11	86661820	86663727	+	ENSG00000150687	13.4631
chr11	87846704	87847029	-	ENSG00000123892	2.58843
chr11	87908281	87908515	-	ENSG00000123892	4.19892
chr11	88026940	88027613	-	ENSG00000109861	13.3689
chr11	88240775	88241320	-	ENSG00000168959	3.65001
chr11	92085605	92086184	+	ENSG00000165323	4.04027
chr11	92087433	92088451	+	ENSG00000165323	7.90835
chr11	92531594	92533073	+	ENSG00000165323	6.99585
chr11	92533627	92533848	+	ENSG00000165323	4.84735
chr11	92534344	92534936	+	ENSG00000165323	7.60419
chr11	92577290	92577805	+	ENSG00000165323	10.95
chr11	92599935	92600436	+	ENSG00000165323	5.77613
chr11	92616215	92616452	+	ENSG00000165323	2.54477
chr11	92623550	92624371	+	ENSG00000165323	32.2417
chr11	93429965	93430369	+	ENSG00000166004	2.23571
chr11	93460292	93460719	+	ENSG00000166004	7.4736
chr11	93862075	93862364	+	ENSG00000110218	5.07762
chr11	93912828	93913031	+	ENSG00000110218	1.89298
chr11	93913232	93913563	+	ENSG00000110218	2.92285
chr11	93913800	93915141	+	ENSG00000110218	15.4868
chr11	94112894	94113306	-	ENSG00000123901	5.17085
chr11	94113516	94113774	-	ENSG00000123901	2.43334
chr11	94277769	94279756	+	ENSG00000196371	35.2992
chr11	94282403	94282741	+	ENSG00000196371	6.33778
chr11	94532501	94533382	+	ENSG00000166025	14.1801
chr11	94602314	94602829	+	ENSG00000166025	4.07165
chr11	94603680	94604322	+	ENSG00000166025	24.3007
chr11	94730571	94732503	+	ENSG00000186280	15.2084
chr11	94823137	94823576	+	ENSG00000149218	6.53892
chr11	94861483	94862947	+	ENSG00000149218	23.1953
chr11	94865207	94865804	+	ENSG00000149218	13.5989
chr11	95711789	95713006	-	ENSG00000184384	17.4213
chr11	95825902	95826833	-	ENSG00000184384	17.5968
chr11	96074356	96075310	-	ENSG00000184384	22.4951
chr11	96117099	96117889	-	ENSG00000149231	9.67639
chr11	101833407	101834075	+	ENSG00000110318	3.05929
chr11	101868258	101868669	+	ENSG00000110318	9.29147
chr11	101871065	101871332	+	ENSG00000110318	3.15776
chr11	102100347	102101012	+	ENSG00000137693	9.14265
chr11	102220475	102221544	+	ENSG00000110330	4.26898
chr11	102248166	102248407	+	ENSG00000110330	1.74257
chr11	104915099	104915396	-	ENSG00000204397	2.48612
chr11	105924194	105924825	-	ENSG00000182359	9.78757
chr11	106558227	106558442	-	ENSG00000152402	3.04167
chr11	106680825	106681251	-	ENSG00000152402	4.25834
chr11	106810183	106810878	-	ENSG00000152402	9.39174
chr11	107197400	107197748	-	ENSG00000152404	5.96533
chr11	107299698	107300217	-	ENSG00000152404	1.59948
chr11	107375375	107376030	-	ENSG00000137760	15.7758
chr11	107663013	107663459	-	ENSG00000110660	4.36117
chr11	108031492	108032394	-	ENSG00000149308	3.05171
chr11	108043117	108043560	-	ENSG00000149308	1.98166
chr11	108044092	108044584	-	ENSG00000149308	8.31646
chr11	108345351	108345737	-	ENSG00000178202	2.12366
chr11	108593765	108594205	+	ENSG00000178105	6.91096
chr11	110007502	110008147	+	ENSG00000149289	13.6289
chr11	110035077	110036542	+	ENSG00000149289	23.3019
chr11	110449920	110451197	-	ENSG00000137727	15.0559
chr11	110451570	110451995	-	ENSG00000137727	20.0975
chr11	111414695	111415049	+	ENSG00000204381	3.58033
chr11	111430883	111431413	+	ENSG00000204381	14.3663
chr11	111594331	111595880	+	ENSG00000170145	18.6071
chr11	111596898	111597477	+	ENSG00000170145	3.3641
chr11	111745826	111746671	-	ENSG00000255561	13.6257
chr11	111796752	111797015	+	ENSG00000254445	3.34584
chr11	111797262	111797499	+	ENSG00000254445	3.65001
chr11	111889594	111890629	+	ENSG00000150764	12.5399
chr11	111953264	111954032	+	ENSG00000150776	15.1115
chr11	111955985	111956288	-	ENSG00000150779	5.42844
chr11	111956686	111956996	-	ENSG00000150779	4.01899
chr11	113558700	113558899	-	ENSG00000166682	3.04167
chr11	113604014	113604362	-	ENSG00000086827	5.08727
chr11	114182876	114183220	+	ENSG00000166741	3.68666
chr11	114270792	114271179	-	ENSG00000180425	3.98393
chr11	114270792	114271179	+	ENSG00000076053	3.98393
chr11	114278162	114278668	+	ENSG00000076053	6.63566
chr11	116714259	116714751	-	ENSG00000160584	4.52502
chr11	116728418	116729358	-	ENSG00000160584	31.0026
chr11	117102987	117103190	-	ENSG00000160613	3.04338
chr11	117159702	117160484	-	ENSG00000186318	5.36619
chr11	117282618	117283298	+	ENSG00000110274	8.18851
chr11	117707860	117708338	-	ENSG00000137726	1.78769
chr11	118097546	118097752	-	ENSG00000160588	3.34584
chr11	118342462	118343045	+	ENSG00000118058	3.42505
chr11	118344322	118344905	+	ENSG00000118058	6.45169
chr11	118373099	118373747	+	ENSG00000118058	4.42255
chr11	118374613	118375354	+	ENSG00000118058	4.16238
chr11	118375489	118377232	+	ENSG00000118058	6.83209
chr11	118392594	118393206	+	ENSG00000118058	4.98831
chr11	118395894	118396255	+	ENSG00000118058	5.21005
chr11	118498057	118499463	+	ENSG00000019144	19.311
chr11	118527353	118527806	+	ENSG00000019144	2.53576
chr11	118622269	118622797	-	ENSG00000110367	10.9266
chr11	118656831	118657321	-	ENSG00000110367	13.8963
chr11	118769204	118770380	-	ENSG00000186174	8.35709
chr11	118770510	118770940	-	ENSG00000186174	3.82731
chr11	118771236	118773709	-	ENSG00000186174	32.9869
chr11	118964591	118966048	-	ENSG00000188486	64.3225
chr11	118987104	118987327	+	ENSG00000172375	1.69986
chr11	119031630	119032222	+	ENSG00000172350	9.12502
chr11	119044317	119044727	+	ENSG00000160703	8.1502
chr11	119045221	119045661	+	ENSG00000160703	5.49984
chr11	119045861	119046082	+	ENSG00000160703	2.70882
chr11	119050843	119051061	+	ENSG00000160703	2.1985
chr11	119155859	119156143	+	ENSG00000110395	1.52418
chr11	119179424	119180626	-	ENSG00000076706	3.7486
chr11	119205270	119207505	+	ENSG00000173456	11.2515
chr11	119209714	119210541	-	ENSG00000223953	9.38641
chr11	119209714	119210541	-	ENSG00000259159	9.38641
chr11	119209714	119210541	-	ENSG00000235718	9.38641
chr11	119227012	119227629	-	ENSG00000036672	10.6459
chr11	119243559	119244039	-	ENSG00000036672	2.73751
chr11	119288949	119289198	-	ENSG00000154096	2.96212
chr11	119289497	119289863	-	ENSG00000154096	9.79748
chr11	120100031	120100462	+	ENSG00000184232	3.12249
chr11	120350591	120351160	+	ENSG00000196914	19.8609
chr11	120856640	120857210	+	ENSG00000149403	8.21252
chr11	120957399	120957843	+	ENSG00000154114	6.44232
chr11	120995946	120996627	+	ENSG00000109927	9.42919
chr11	121000441	121000860	+	ENSG00000109927	8.51669
chr11	121008087	121008725	+	ENSG00000109927	13.3834
chr11	121016424	121016827	+	ENSG00000109927	5.47992
chr11	122680446	122680981	+	ENSG00000154127	6.82571
chr11	122756516	122756983	+	ENSG00000109944	6.69168
chr11	122774521	122775142	+	ENSG00000109944	3.30093
chr11	122805203	122805795	+	ENSG00000109944	4.88109
chr11	122829941	122830239	+	ENSG00000109944	4.56251
chr11	122928229	122928504	-	ENSG00000109971	2.67921
chr11	123503027	123503425	-	ENSG00000166257	2.82086
chr11	123503727	123504481	-	ENSG00000166257	11.7451
chr11	123601084	123601647	-	ENSG00000166261	7.28673
chr11	124545110	124545387	+	ENSG00000064199	2.02618
chr11	124616491	124616987	+	ENSG00000154146	3.85727
chr11	124636730	124638055	-	ENSG00000120458	16.4813
chr11	124669701	124669948	-	ENSG00000120458	3.21607
chr11	124754265	124754520	-	ENSG00000154133	2.74697
chr11	124857114	124858011	+	ENSG00000149548	7.68596
chr11	124957998	124958440	+	ENSG00000134955	5.73525
chr11	125301113	125301894	+	ENSG00000165495	10.95
chr11	125763458	125764119	-	ENSG00000110060	21.7904
chr11	125769415	125770098	+	ENSG00000198331	9.67664
chr11	125829657	125830129	-	ENSG00000064309	3.78966
chr11	125831467	125831707	-	ENSG00000064309	2.92936
chr11	126072709	126073552	-	ENSG00000165526	12.1683
chr11	126147513	126148000	+	ENSG00000110074	15.7156
chr11	128331802	128332494	-	ENSG00000134954	9.17167
chr11	128680309	128680960	+	ENSG00000151702	21.8791
chr11	128838580	128840023	-	ENSG00000134909	21.9117
chr11	128840216	128841020	-	ENSG00000134909	7.17717
chr11	128842391	128843410	-	ENSG00000134909	8.17977
chr11	129739391	129740005	-	ENSG00000170322	19.211
chr11	129784575	129784972	-	ENSG00000170325	5.05046
chr11	130130844	130131246	-	ENSG00000196323	5.45451
[truncated: 8,517 more rows]

## Sheet: Table S1 m6A peak in OS
Supplemental Table 1. Identified m6A peaks in OS
Chromosome	Chr_start	Chr_stop	Strand	GeneID	enrichment
chr1	135062	135370	-	ENSG00000237683	7.02405
chr1	138160	139180	-	ENSG00000237683	10.1906
chr1	878103	878472	+	ENSG00000187634	1.53758
chr1	879380	879584	+	ENSG00000187634	1.49822
chr1	949411	949783	+	ENSG00000187608	1.16829
chr1	989894	991334	+	ENSG00000188157	14.4416
chr1	1152380	1153202	-	ENSG00000078808	3.95507
chr1	1167989	1170625	+	ENSG00000176022	15.8662
chr1	1190303	1190901	-	ENSG00000160087	9.54651
chr1	1244347	1244610	+	ENSG00000169972	2.35497
chr1	1246757	1247121	+	ENSG00000169972	1.99711
chr1	1262677	1264229	+	ENSG00000224051	20.4124
chr1	1271242	1271814	-	ENSG00000107404	2.60583
chr1	1290894	1291273	-	ENSG00000162576	7.41234
chr1	1322140	1323271	-	ENSG00000221978	17.7814
chr1	1326603	1326914	-	ENSG00000221978	1.08904
chr1	1374295	1374858	+	ENSG00000179403	19.7871
chr1	1375119	1376079	+	ENSG00000179403	11.0214
chr1	1510422	1511189	+	ENSG00000215014	9.11603
chr1	1533475	1534123	-	ENSG00000228594	16.8001
chr1	1534286	1535044	-	ENSG00000228594	5.19335
chr1	1580494	1580765	-	ENSG00000248333	9.19766
chr1	1593888	1594099	-	ENSG00000189339	1.88518
chr1	1594507	1595303	-	ENSG00000189339	9.58741
chr1	1596370	1597487	-	ENSG00000189339	39.8993
chr1	1622549	1622955	-	ENSG00000189339	9.58862
chr1	1675713	1675930	-	ENSG00000215790	1.9356
chr1	1677042	1677343	-	ENSG00000215790	3.76268
chr1	1682722	1683391	-	ENSG00000008130	8.17564
chr1	1849087	1849586	-	ENSG00000178821	9.81266
chr1	2121558	2122852	+	ENSG00000269554	9.84473
chr1	2143226	2144325	-	ENSG00000203301	16.4515
chr1	2144664	2144863	-	ENSG00000203301	1.87095
chr1	2160457	2161237	+	ENSG00000157933	7.43729
chr1	2238113	2239945	+	ENSG00000157933	15.6634
chr1	2334445	2335091	+	ENSG00000157916	3.71779
chr1	2335972	2337201	-	ENSG00000157911	4.10973
chr1	2435547	2436579	+	ENSG00000149527	3.29955
chr1	2494492	2495249	+	ENSG00000157873	14.643
chr1	2520864	2521175	+	ENSG00000157870	1.59156
chr1	3379650	3380192	+	ENSG00000130762	16.8386
chr1	3544996	3545524	+	ENSG00000158109	3.20511
chr1	3546395	3546623	+	ENSG00000158109	2.00782
chr1	3703273	3703906	-	ENSG00000130764	7.62607
chr1	3712255	3712680	-	ENSG00000130764	3.72584
chr1	3731419	3732055	-	ENSG00000116198	2.94728
chr1	3800032	3800250	+	ENSG00000169598	2.55951
chr1	3807140	3807696	-	ENSG00000198912	12.0687
chr1	4772075	4772710	+	ENSG00000196581	5.61285
chr1	5923035	5923427	-	ENSG00000131697	3.01136
chr1	6052538	6052983	+	ENSG00000069424	3.34424
chr1	6158437	6159038	+	ENSG00000069424	11.4163
chr1	6159564	6159915	+	ENSG00000069424	2.72342
chr1	6283665	6284136	-	ENSG00000116237	3.66731
chr1	6284605	6285421	-	ENSG00000116237	27.3136
chr1	6308948	6309542	-	ENSG00000158292	16.5162
chr1	6313742	6313941	-	ENSG00000158292	1.80636
chr1	6521270	6521705	-	ENSG00000215788	12.6887
chr1	6584408	6584897	-	ENSG00000162408	20.355
chr1	6585455	6586154	-	ENSG00000162408	2.18301
chr1	6640553	6641710	+	ENSG00000204859	16.295
chr1	6652632	6653917	-	ENSG00000162413	23.5797
chr1	6658918	6659636	-	ENSG00000162413	33.602
chr1	6661662	6662828	-	ENSG00000162413	17.148
chr1	6679876	6680577	+	ENSG00000116273	12.604
chr1	6681309	6682150	+	ENSG00000116273	20.8041
chr1	6694506	6695915	-	ENSG00000007923	3.70374
chr1	7826624	7826826	+	ENSG00000171735	2.56244
chr1	7840960	7841341	+	ENSG00000049245	1.67978
chr1	7887217	7887736	+	ENSG00000049246	5.85242
chr1	8073204	8074454	-	ENSG00000116285	11.1911
chr1	8385902	8386156	+	ENSG00000162426	3.81193
chr1	8390345	8391003	+	ENSG00000162426	9.58862
chr1	8403892	8404176	+	ENSG00000162426	3.7419
chr1	8414974	8415229	-	ENSG00000142599	1.69893
chr1	8418195	8419045	-	ENSG00000142599	11.3249
chr1	8421111	8421911	-	ENSG00000142599	12.552
chr1	8716019	8716492	-	ENSG00000142599	7.92354
chr1	9163718	9164771	-	ENSG00000180758	10.6014
chr1	9294850	9295319	+	ENSG00000049239	27.1509
chr1	9304882	9305756	+	ENSG00000049239	21.053
chr1	9322064	9322506	+	ENSG00000049239	1.63316
chr1	9323354	9325545	+	ENSG00000049239	10.9773
chr1	9328836	9330345	+	ENSG00000049239	16.0688
chr1	9330522	9330973	+	ENSG00000049239	5.57711
chr1	9415757	9416839	+	ENSG00000171621	25.9997
chr1	9427326	9428333	+	ENSG00000171621	31.8344
chr1	9672934	9673703	+	ENSG00000188807	21.2963
chr1	9786929	9787553	+	ENSG00000171608	7.18502
chr1	9990066	9990485	-	ENSG00000162441	3.39936
chr1	10042388	10042980	+	ENSG00000173614	7.63934
chr1	10438044	10439427	+	ENSG00000054523	6.42155
chr1	10440713	10440931	+	ENSG00000054523	2.39354
chr1	10479614	10480116	+	ENSG00000142657	2.01098
chr1	10689645	10690238	+	ENSG00000142655	15.7457
chr1	10713167	10714572	-	ENSG00000130940	27.0848
chr1	10719857	10720655	-	ENSG00000130940	3.00942
chr1	10725002	10725566	-	ENSG00000130940	7.01607
chr1	11166720	11167534	-	ENSG00000198793	6.03202
chr1	11561157	11561362	+	ENSG00000204624	3.27416
chr1	11766523	11766957	+	ENSG00000162490	4.44347
chr1	11779540	11781267	+	ENSG00000162490	21.1976
chr1	11784391	11784943	+	ENSG00000162490	3.87535
chr1	11850095	11851343	-	ENSG00000177000	22.4677
chr1	11982534	11983705	-	ENSG00000116685	7.41512
chr1	11985162	11986152	-	ENSG00000116685	11.3684
chr1	12071529	12072646	+	ENSG00000116688	11.9185
chr1	12202370	12204137	+	ENSG00000120949	9.35475
chr1	12266952	12267754	+	ENSG00000028137	10.3265
chr1	12268428	12269265	+	ENSG00000028137	25.3053
chr1	12336057	12338096	+	ENSG00000048707	13.0497
chr1	12342824	12343504	+	ENSG00000048707	5.0833
chr1	12628065	12628400	-	ENSG00000162496	5.90656
chr1	14104855	14106919	+	ENSG00000116731	6.71287
chr1	14107586	14109437	+	ENSG00000116731	10.4331
chr1	15440984	15442173	+	ENSG00000189337	7.4838
chr1	15442321	15444238	+	ENSG00000189337	4.91125
chr1	15545763	15546930	+	ENSG00000171729	32.7306
chr1	15819200	15819619	-	ENSG00000132906	7.0763
chr1	15844749	15844998	-	ENSG00000132906	2.8426
chr1	15894190	15895511	+	ENSG00000116138	20.1011
chr1	15986279	15988333	+	ENSG00000215695	13.2059
chr1	15986279	15988333	+	ENSG00000197312	13.2059
chr1	16053338	16054607	+	ENSG00000116786	26.9644
chr1	16060558	16060918	+	ENSG00000116786	3.02149
chr1	16066124	16066805	+	ENSG00000162461	3.96842
chr1	16067591	16067833	+	ENSG00000162461	3.15432
chr1	16111044	16111392	+	ENSG00000162458	3.81533
chr1	16202503	16203093	+	ENSG00000065526	18.6028
chr1	16254519	16256282	+	ENSG00000065526	15.3643
chr1	16256643	16257408	+	ENSG00000065526	5.05587
chr1	16258329	16259488	+	ENSG00000065526	3.92257
chr1	16259946	16260628	+	ENSG00000065526	2.55218
chr1	16260972	16261241	+	ENSG00000065526	1.99917
chr1	16261492	16262228	+	ENSG00000065526	3.63866
chr1	16265863	16266576	+	ENSG00000065526	19.4856
chr1	16268418	16268716	-	ENSG00000116809	3.57479
chr1	16451046	16451772	-	ENSG00000142627	10.4424
chr1	16474803	16475651	-	ENSG00000142627	9.64871
chr1	16524762	16524964	-	ENSG00000142632	2.11848
chr1	16577033	16578251	-	ENSG00000037637	24.5678
chr1	16890275	16890729	-	ENSG00000219481	5.17746
chr1	17734422	17735059	-	ENSG00000179051	7.26431
chr1	19234761	19235102	-	ENSG00000169991	3.36303
chr1	19282887	19283133	-	ENSG00000169991	5.89518
chr1	19545485	19546096	-	ENSG00000127463	19.2358
chr1	19585006	19585795	+	ENSG00000053372	13.3965
chr1	19615309	19615806	-	ENSG00000162482	9.35475
chr1	19654893	19655819	+	ENSG00000040487	32.6445
chr1	20008720	20009839	-	ENSG00000162542	20.4973
chr1	20809984	20810274	-	ENSG00000162545	3.37835
chr1	20812477	20812706	-	ENSG00000162545	3.40134
chr1	20826186	20827904	-	ENSG00000090432	22.9473
chr1	20977062	20977691	+	ENSG00000158828	7.59953
chr1	21133665	21133879	-	ENSG00000075151	2.02128
chr1	21267878	21268746	-	ENSG00000075151	3.6121
chr1	21544308	21545109	-	ENSG00000117298	5.54105
chr1	21545594	21545837	-	ENSG00000117298	1.87387
chr1	21546043	21546685	-	ENSG00000117298	11.0189
chr1	22148725	22149182	-	ENSG00000142798	10.8949
chr1	22446515	22447102	-	ENSG00000162552	6.54833
chr1	22816552	22817010	+	ENSG00000184677	5.01912
chr1	22838150	22838479	+	ENSG00000184677	2.61988
chr1	22852617	22853825	+	ENSG00000184677	12.1149
chr1	22854093	22854885	+	ENSG00000184677	8.46486
chr1	22855097	22856031	+	ENSG00000184677	13.8645
chr1	22856718	22857054	+	ENSG00000184677	4.20361
chr1	23110786	23111475	+	ENSG00000133216	14.4882
chr1	23191328	23191681	+	ENSG00000133216	2.19901
chr1	23239968	23241376	+	ENSG00000133216	18.6383
chr1	23410596	23411011	-	ENSG00000169641	5.23363
chr1	23414233	23415720	-	ENSG00000169641	14.2752
chr1	23417510	23418417	-	ENSG00000169641	13.2517
chr1	23418663	23418911	-	ENSG00000169641	1.6888
chr1	23419053	23420684	-	ENSG00000169641	5.89538
chr1	23519672	23521302	-	ENSG00000179546	13.2675
chr1	23636782	23637681	-	ENSG00000125944	16.2411
chr1	23687774	23689748	-	ENSG00000125945	21.4442
chr1	24077502	24078969	+	ENSG00000011007	17.2336
chr1	24085842	24086343	+	ENSG00000011007	6.38076
chr1	24113770	24114003	+	ENSG00000057757	1.68729
chr1	24128496	24129037	-	ENSG00000117305	2.47889
chr1	24171816	24172331	-	ENSG00000179163	2.27498
chr1	24383559	24384017	-	ENSG00000142661	6.54833
chr1	24684530	24685187	-	ENSG00000001460	29.5683
chr1	24687162	24687528	-	ENSG00000001460	7.22261
chr1	24745814	24746253	+	ENSG00000001461	2.64424
chr1	25663447	25664100	-	ENSG00000117616	4.68412
chr1	25687855	25688554	+	ENSG00000183726	3.8116
chr1	25784744	25785503	+	ENSG00000204178	14.2301
chr1	25824915	25825174	+	ENSG00000204178	5.1251
chr1	25825416	25825701	+	ENSG00000204178	2.05278
chr1	25893290	25894301	+	ENSG00000157978	5.86046
chr1	25944085	25944765	+	ENSG00000117643	3.0403
chr1	26110209	26110560	+	ENSG00000117643	7.01607
chr1	26142077	26142723	+	ENSG00000162430	8.7518
chr1	26158525	26159027	+	ENSG00000117640	4.27292
chr1	26161458	26162235	-	ENSG00000127423	13.1945
chr1	26189017	26190355	-	ENSG00000182749	10.665
chr1	26287926	26288681	-	ENSG00000158006	56.9705
chr1	26448287	26449205	+	ENSG00000175087	12.4805
chr1	26449819	26450105	+	ENSG00000175087	5.35312
chr1	26487777	26489035	+	ENSG00000197245	39.5238
chr1	26497047	26497389	+	ENSG00000142684	10.534
chr1	26581696	26582356	+	ENSG00000130695	5.07143
chr1	26795235	26795915	+	ENSG00000117682	11.9901
chr1	26900558	26901175	+	ENSG00000117676	11.0912
chr1	27101112	27101457	+	ENSG00000117713	5.46724
chr1	27105532	27107448	+	ENSG00000117713	30.1957
chr1	27121410	27121838	+	ENSG00000060642	2.84384
chr1	27123943	27124409	+	ENSG00000060642	5.40414
chr1	27180213	27180619	+	ENSG00000204160	3.21551
chr1	27216024	27216722	-	ENSG00000142751	4.1333
chr1	27217002	27217776	-	ENSG00000198746	4.64911
chr1	27223624	27224250	-	ENSG00000198746	22.3358
chr1	27226307	27226831	-	ENSG00000198746	3.14712
chr1	27320208	27320518	+	ENSG00000253368	6.58612
chr1	27326317	27326665	+	ENSG00000253368	2.82702
chr1	27331837	27333512	-	ENSG00000158246	32.392
chr1	27426034	27426314	-	ENSG00000090020	2.85866
chr1	27426623	27426931	-	ENSG00000090020	3.82289
chr1	27681702	27681923	-	ENSG00000142733	2.2778
chr1	27720401	27721003	+	ENSG00000181773	9.5946
chr1	28176485	28176940	+	ENSG00000117751	18.2604
chr1	28208714	28209539	+	ENSG00000130775	32.7416
chr1	28212270	28213146	+	ENSG00000130775	16.4069
chr1	28293053	28294142	+	ENSG00000158156	15.0821
chr1	28300520	28300879	-	ENSG00000158161	2.0557
chr1	28476176	28476483	-	ENSG00000169403	2.80643
chr1	28607235	28607753	+	ENSG00000130766	7.42834
chr1	28660784	28661582	+	ENSG00000130772	21.0264
chr1	28792902	28793396	+	ENSG00000204138	7.09714
chr1	28799900	28800536	+	ENSG00000204138	4.62873
chr1	28823028	28823421	+	ENSG00000204138	3.97224
chr1	28864289	28865441	+	ENSG00000180198	5.92576
chr1	28921179	28921386	+	ENSG00000188060	2.57256
chr1	28929739	28930132	-	ENSG00000120656	1.89406
chr1	29068909	29070651	+	ENSG00000198492	31.4914
chr1	29313850	29314402	+	ENSG00000159023	15.4102
chr1	29445790	29446232	+	ENSG00000159023	2.91308
chr1	29445790	29446232	-	ENSG00000253304	2.91308
chr1	29519539	29520530	-	ENSG00000116353	10.9293
chr1	31347050	31347551	-	ENSG00000162512	3.5694
chr1	31349270	31349989	-	ENSG00000162512	3.70303
chr1	31532074	31532485	-	ENSG00000134644	2.88714
chr1	32052327	32053019	+	ENSG00000142910	6.23982
chr1	32095902	32096422	-	ENSG00000162517	5.01956
chr1	32196478	32196865	-	ENSG00000121753	2.17375
chr1	32221832	32222435	-	ENSG00000121753	15.6692
chr1	32568167	32568441	+	ENSG00000121775	3.01167
chr1	32636360	32636845	+	ENSG00000025800	11.8594
chr1	32641612	32641993	+	ENSG00000025800	3.7808
chr1	32646740	32647143	+	ENSG00000084652	2.8683
chr1	32671757	32672026	+	ENSG00000160051	1.69844
chr1	32672730	32674140	+	ENSG00000160051	14.5054
chr1	32800027	32800559	-	ENSG00000175130	4.6895
chr1	32832056	32832421	-	ENSG00000160058	5.14951
chr1	32841703	32842353	-	ENSG00000160058	18.2092
chr1	33058566	33059124	+	ENSG00000160062	1.9884
chr1	33058566	33059124	+	ENSG00000254553	1.9884
chr1	33065553	33066187	+	ENSG00000160062	8.6285
chr1	33065553	33066187	+	ENSG00000254553	8.6285
chr1	33147077	33147326	-	ENSG00000162520	1.8982
chr1	33160320	33161635	-	ENSG00000162520	18.9145
chr1	33235441	33235984	+	ENSG00000162522	3.41306
chr1	33237452	33238169	+	ENSG00000162522	9.99478
chr1	33238315	33238962	+	ENSG00000162522	4.16349
chr1	33241271	33241639	-	ENSG00000134684	2.81547
chr1	33283320	33283616	-	ENSG00000134684	2.61608
chr1	33291738	33292505	+	ENSG00000116497	14.455
chr1	33402232	33402928	-	ENSG00000116514	17.0121
chr1	33611172	33611444	-	ENSG00000116525	1.92782
chr1	33611663	33611891	-	ENSG00000116525	2.28144
chr1	33612359	33613308	-	ENSG00000116525	7.96668
chr1	33764671	33765580	+	ENSG00000160094	34.2542
chr1	33944779	33945395	+	ENSG00000121903	23.9113
chr1	33956530	33957402	+	ENSG00000121903	23.9467
chr1	33958602	33959350	+	ENSG00000121903	27.0909
chr1	33959650	33961494	+	ENSG00000121903	10.407
chr1	35259820	35261287	+	ENSG00000187513	20.0028
chr1	35824575	35825108	+	ENSG00000146463	8.26671
chr1	35846985	35847395	+	ENSG00000146463	4.36367
chr1	35884931	35885745	+	ENSG00000146463	6.7205
chr1	35899259	35899661	-	ENSG00000142687	3.2346
chr1	35972232	35972749	-	ENSG00000142687	29.5274
chr1	36025809	36026769	+	ENSG00000020129	12.3452
chr1	36060209	36060515	+	ENSG00000116819	5.14511
chr1	36186225	36186658	-	ENSG00000092853	7.37574
chr1	36216768	36217145	-	ENSG00000092853	1.77764
chr1	36225794	36226709	-	ENSG00000092853	14.1915
chr1	36229855	36230385	-	ENSG00000092853	9.89475
chr1	36319067	36319651	+	ENSG00000134698	6.05828
chr1	36320586	36321725	+	ENSG00000134698	10.5934
chr1	36385220	36385560	+	ENSG00000092847	3.81463
chr1	36521255	36521577	+	ENSG00000126070	9.50137
chr1	36562459	36563538	-	ENSG00000171812	6.03325
chr1	36564144	36564361	-	ENSG00000171812	2.49029
chr1	36602478	36603006	-	ENSG00000054116	5.02293
chr1	36752184	36752540	+	ENSG00000054118	2.4846
chr1	36754692	36755170	+	ENSG00000054118	7.53544
chr1	36787655	36788197	-	ENSG00000142694	15.1556
chr1	36789300	36789676	+	ENSG00000116883	2.22757
chr1	36793779	36794646	+	ENSG00000116883	4.87349
chr1	36851263	36851471	-	ENSG00000196182	3.45297
chr1	37941071	37941392	+	ENSG00000163874	5.56525
chr1	37948411	37948928	+	ENSG00000163874	8.78222
chr1	38005575	38006519	-	ENSG00000163877	14.7713
chr1	38019434	38019812	-	ENSG00000163877	10.2468
chr1	38265440	38265688	+	ENSG00000185090	2.36777
chr1	38287641	38288264	-	ENSG00000188786	21.4258
chr1	38322882	38323376	-	ENSG00000188786	15.1
chr1	38455622	38456155	-	ENSG00000183431	3.72393
chr1	39304386	39305406	-	ENSG00000116954	8.75263
chr1	39325183	39325404	-	ENSG00000116954	5.43731
chr1	39797701	39799037	+	ENSG00000127603	5.60739
chr1	39799321	39799766	+	ENSG00000127603	3.56034
chr1	39800237	39800696	+	ENSG00000127603	4.23025
chr1	39801758	39802226	+	ENSG00000127603	4.42858
chr1	39823023	39823543	+	ENSG00000127603	6.43982
chr1	39851088	39851677	+	ENSG00000127603	7.67944
chr1	39852684	39854422	+	ENSG00000127603	17.8985
chr1	39874689	39878822	+	ENSG00000255103	13.3065
chr1	39879511	39880252	+	ENSG00000255103	8.3863
chr1	40090674	40091910	-	ENSG00000163909	5.61285
chr1	40235332	40235689	-	ENSG00000198754	6.31446
chr1	40361349	40363788	-	ENSG00000116990	17.2188
chr1	40435257	40435463	+	ENSG00000168389	3.81343
chr1	40701549	40703664	+	ENSG00000117000	9.74111
chr1	40703989	40705184	+	ENSG00000117000	4.11552
chr1	40705362	40706373	+	ENSG00000117000	14.3137
chr1	40758091	40758441	+	ENSG00000084073	5.64129
chr1	40916298	40916640	+	ENSG00000187801	4.01473
chr1	40928108	40929222	+	ENSG00000187801	21.46
chr1	40944691	40945000	+	ENSG00000187815	5.84672
chr1	40960691	40961835	+	ENSG00000187815	6.45021
chr1	40980140	40981567	+	ENSG00000164002	24.2766
chr1	41012059	41013371	+	ENSG00000117010	12.7123
chr1	41304101	41304300	+	ENSG00000117013	2.10482
chr1	41326801	41327417	-	ENSG00000179862	23.9032
chr1	41327663	41327959	-	ENSG00000179862	2.45298
chr1	41827500	41828193	+	ENSG00000204060	4.91125
chr1	41847002	41847702	+	ENSG00000204060	4.84915
chr1	41848172	41848410	+	ENSG00000204060	4.20964
chr1	41975997	41977085	-	ENSG00000127124	57.3796
chr1	41978434	41979514	-	ENSG00000127124	20.4585
chr1	42045430	42046507	-	ENSG00000127124	2.94409
chr1	42046962	42048651	-	ENSG00000127124	6.77319
chr1	42050432	42050998	-	ENSG00000127124	20.2326
chr1	42645169	42645402	-	ENSG00000198815	3.19754
chr1	43148075	43148323	+	ENSG00000065978	2.36856
chr1	43212081	43212540	-	ENSG00000117385	17.3941
chr1	43308088	43309002	+	ENSG00000164010	15.6799
chr1	43316535	43317905	+	ENSG00000164011	20.6769
chr1	43392050	43392836	-	ENSG00000117394	8.57187
chr1	43915826	43916804	+	ENSG00000198198	20.1211
chr1	44054472	44054839	+	ENSG00000142949	2.93755
chr1	44056488	44057076	+	ENSG00000142949	10.5141
chr1	44069139	44069814	+	ENSG00000142949	11.8938
chr1	44087753	44088012	+	ENSG00000142949	1.71824
chr1	44169816	44170537	+	ENSG00000066135	7.811
chr1	44402299	44402867	+	ENSG00000117407	12.395
chr1	44412614	44413502	+	ENSG00000117408	12.098
chr1	44435715	44435922	+	ENSG00000132768	3.15732
chr1	44455827	44456451	+	ENSG00000117411	17.8278
chr1	45101587	45102136	-	ENSG00000126106	12.7114
chr1	45271342	45272388	-	ENSG00000188396	4.88849
chr1	45272567	45272889	-	ENSG00000188396	2.34144
chr1	45483790	45485084	-	ENSG00000162415	7.62257
chr1	45553644	45553871	-	ENSG00000162415	4.87349
chr1	45792308	45794170	+	ENSG00000186603	9.65807
chr1	45808558	45809527	+	ENSG00000132773	8.21012
chr1	45810859	45811242	-	ENSG00000070759	3.82654
chr1	46072915	46073968	+	ENSG00000132780	7.50344
chr1	46206633	46206992	-	ENSG00000197429	2.63488
chr1	46500448	46501775	+	ENSG00000086015	8.38329
chr1	46685361	46685937	+	ENSG00000171357	18.895
chr1	46685361	46685937	-	ENSG00000085998	18.895
chr1	46751116	46751760	-	ENSG00000132128	4.89961
chr1	46827188	46827728	+	ENSG00000117481	3.9289
chr1	47073739	47074003	-	ENSG00000142961	3.344
chr1	47074152	47074376	-	ENSG00000142961	3.23643
chr1	47075068	47075433	-	ENSG00000142961	5.66375
chr1	47075576	47075891	-	ENSG00000142961	4.44351
chr1	47078554	47079187	-	ENSG00000142961	8.47392
chr1	47184278	47184746	-	ENSG00000159658	4.84393
chr1	47716830	47717604	-	ENSG00000123473	13.2627
chr1	47745834	47746817	-	ENSG00000123473	6.93961
chr1	47902211	47903145	+	ENSG00000186564	4.91125
chr1	47904900	47905129	+	ENSG00000186564	2.57256
chr1	49224439	49225016	-	ENSG00000162373	5.26804
chr1	51434420	51436361	+	ENSG00000123080	19.5135
chr1	51439414	51439912	+	ENSG00000123080	15.7928
chr1	52343854	52344402	-	ENSG00000078618	10.3414
chr1	52497866	52499418	-	ENSG00000198841	35.7222
chr1	52703296	52705119	+	ENSG00000157077	10.5561
chr1	52811852	52812120	+	ENSG00000157077	1.4116
chr1	52818248	52818871	-	ENSG00000154222	4.52774
chr1	52858985	52859536	-	ENSG00000085840	12.8452
chr1	52861611	52861950	-	ENSG00000085840	2.1747
chr1	52883264	52883754	+	ENSG00000134748	3.44455
chr1	52940563	52941259	-	ENSG00000134744	18.6174
chr1	52991257	52991846	-	ENSG00000134744	3.79113
chr1	53074117	53074568	+	ENSG00000116157	4.68193
chr1	53153147	53154002	-	ENSG00000162377	19.4472
chr1	53236645	53237419	+	ENSG00000162378	10.7254
chr1	53322676	53323408	+	ENSG00000203995	8.82763
chr1	53358625	53359089	+	ENSG00000203995	11.4596
chr1	53460323	53461478	+	ENSG00000116171	4.39003
chr1	53675676	53677008	+	ENSG00000157184	5.6884
chr1	53678893	53679150	+	ENSG00000157184	1.67301
chr1	53679809	53680487	-	ENSG00000162384	3.71344
chr1	54233437	54233765	-	ENSG00000058804	4.99786
chr1	54317453	54317813	-	ENSG00000058799	7.85245
chr1	54417672	54417954	+	ENSG00000116212	1.85423
chr1	54561966	54562692	+	ENSG00000116205	7.06796
chr1	54638999	54640654	-	ENSG00000215883	26.661
chr1	55074607	55075741	-	ENSG00000162391	10.2389
chr1	55207077	55207996	+	ENSG00000243725	20.4754
chr1	55207077	55207996	+	ENSG00000184313	20.4754
chr1	55223206	55224812	-	ENSG00000162396	29.3032
chr1	55316195	55318107	-	ENSG00000116133	16.0451
chr1	55532098	55532627	-	ENSG00000162402	9.93605
chr1	55532771	55533174	-	ENSG00000162402	2.79017
chr1	55534282	55534839	-	ENSG00000162402	14.9882
chr1	57044731	57045148	-	ENSG00000162407	3.17056
chr1	57169689	57170065	+	ENSG00000162409	6.11265
chr1	59041240	59042794	-	ENSG00000184292	8.27376
chr1	59147511	59148384	-	ENSG00000162601	6.44471
chr1	59247112	59249659	-	ENSG00000177606	55.7291
chr1	61553837	61554389	+	ENSG00000162599	6.98624
chr1	62901929	62902240	+	ENSG00000162607	2.85557
chr1	62910403	62910915	+	ENSG00000162607	9.65538
chr1	62915983	62916401	+	ENSG00000162607	2.29809
chr1	63282201	63282611	+	ENSG00000125703	3.53944
chr1	64642998	64645238	+	ENSG00000185483	17.1674
chr1	65156947	65158045	+	ENSG00000158966	14.0605
chr1	65243306	65243729	+	ENSG00000162437	8.46466
chr1	65299843	65300130	-	ENSG00000162434	1.69872
chr1	65858066	65858471	+	ENSG00000116675	4.4078
chr1	67130773	67132501	-	ENSG00000248458	5.84672
chr1	67147571	67148057	+	ENSG00000118473	4.20964
chr1	67469800	67470090	-	ENSG00000116704	3.06399
chr1	68150991	68151190	+	ENSG00000116717	2.55985
chr1	68153380	68153793	+	ENSG00000116717	7.88601
chr1	72747997	72748401	-	ENSG00000172260	6.16233
chr1	76877707	76878221	+	ENSG00000184005	2.65601
chr1	77094227	77095311	+	ENSG00000184005	12.322
chr1	78097458	78099022	-	ENSG00000036549	11.4552
chr1	78401453	78401870	+	ENSG00000162614	1.34866
chr1	78478657	78479327	+	ENSG00000162616	12.2515
chr1	78511747	78512148	+	ENSG00000137960	1.47917
chr1	78958974	78959175	+	ENSG00000122420	3.00942
chr1	79115962	79116448	+	ENSG00000137965	3.92668
chr1	82408630	82409483	+	ENSG00000117114	18.5219
chr1	82455951	82457369	+	ENSG00000117114	15.9198
chr1	85624475	85624942	-	ENSG00000097096	7.52651
chr1	85647719	85648969	-	ENSG00000097096	15.5234
chr1	85655578	85656558	-	ENSG00000097096	10.2681
chr1	85665828	85667060	-	ENSG00000097096	15.9659
chr1	85718130	85718468	-	ENSG00000162642	3.13586
chr1	85733291	85733781	-	ENSG00000142867	4.58486
chr1	85736155	85736620	-	ENSG00000142867	1.87992
chr1	86048441	86049146	+	ENSG00000142871	8.21364
chr1	86815840	86817555	-	ENSG00000122417	25.772
chr1	87794515	87794778	+	ENSG00000143013	3.44384
chr1	87810478	87810834	+	ENSG00000143013	3.38817
chr1	89448183	89449749	-	ENSG00000213516	21.1113
chr1	89651030	89651229	-	ENSG00000162654	1.67959
chr1	90024122	90024445	+	ENSG00000197147	2.10482
chr1	90048220	90050524	+	ENSG00000197147	20.439
chr1	90227505	90228235	+	ENSG00000171488	8.36242
chr1	90492837	90493273	+	ENSG00000162664	2.76073
chr1	91403027	91404072	-	ENSG00000122482	15.9364
chr1	91404858	91405480	-	ENSG00000122482	5.2971
chr1	91406295	91406865	-	ENSG00000122482	10.0824
chr1	91989514	91989888	+	ENSG00000097046	13.6322
chr1	92642414	92643082	+	ENSG00000069712	11.4596
chr1	92645881	92646963	+	ENSG00000069712	10.758
chr1	92647707	92647987	+	ENSG00000069712	2.31606
chr1	92649503	92649923	+	ENSG00000069712	4.91125
chr1	92853003	92853244	+	ENSG00000122484	3.37564
chr1	92940504	92941758	-	ENSG00000162676	15.6692
chr1	92979165	92979538	-	ENSG00000067208	5.50275
chr1	93602153	93602679	+	ENSG00000143033	15.7034
chr1	93646015	93646632	+	ENSG00000122483	1.70528
chr1	93811707	93812348	+	ENSG00000117505	4.67984
chr1	94018591	94018921	+	ENSG00000137942	5.0195
chr1	94047731	94048546	-	ENSG00000137936	23.111
chr1	94342035	94342979	-	ENSG00000067334	4.69518
chr1	95709768	95710273	+	ENSG00000122481	11.6745
chr1	95709768	95710273	+	ENSG00000271092	11.6745
chr1	100154361	100155288	+	ENSG00000099260	10.0123
chr1	100547554	100547904	+	ENSG00000156875	2.25281
chr1	101005760	101005977	+	ENSG00000181656	2.10482
chr1	101203849	101204048	+	ENSG00000162692	2.57256
chr1	101339443	101340014	-	ENSG00000162694	10.0512
chr1	101342980	101343476	-	ENSG00000162694	8.58444
chr1	101704404	101706141	+	ENSG00000170989	14.2799
chr1	104068748	104068972	+	ENSG00000185946	1.40538
chr1	107599335	107600793	+	ENSG00000198890	14.2883
chr1	107690849	107691093	+	ENSG00000162631	2.80643
chr1	108023578	108023826	+	ENSG00000162631	3.7419
chr1	109177721	109178092	+	ENSG00000162636	5.58509
chr1	109191299	109191583	-	ENSG00000162639	1.70601
chr1	109241848	109242688	+	ENSG00000134186	9.31556
chr1	109472183	109472724	-	ENSG00000121940	9.26378
chr1	109477126	109477621	-	ENSG00000121940	3.12521
chr1	109479653	109479867	-	ENSG00000121940	1.70971
chr1	109513789	109514261	-	ENSG00000085433	9.62321
chr1	109553560	109554408	-	ENSG00000085433	6.18561
chr1	109636713	109637483	+	ENSG00000215717	3.42944
chr1	109780378	109780749	+	ENSG00000031698	7.48828
chr1	109792923	109796115	+	ENSG00000143126	17.774
chr1	109800985	109801524	+	ENSG00000143126	3.97577
chr1	109816797	109817445	+	ENSG00000143126	16.3708
chr1	109822323	109823018	-	ENSG00000134222	9.89309
chr1	110033686	110034366	+	ENSG00000162650	16.6633
chr1	110038265	110039132	+	ENSG00000174151	11.214
chr1	110050382	110051089	-	ENSG00000181754	4.91125
chr1	110134787	110135321	+	ENSG00000065135	5.0972
chr1	110471348	110472746	+	ENSG00000184371	32.8706
chr1	110596176	110596684	+	ENSG00000143093	8.96235
chr1	110740882	110741272	+	ENSG00000197106	4.20964
chr1	110765457	110766641	+	ENSG00000116396	8.54605
chr1	110882071	110884922	+	ENSG00000162775	21.8421
chr1	110921577	110921973	-	ENSG00000168679	9.58862
chr1	111490603	111491121	-	ENSG00000121931	6.60434
chr1	111493940	111495360	-	ENSG00000121931	7.92766
chr1	111506112	111506534	-	ENSG00000121931	1.34516
chr1	111690276	111690576	+	ENSG00000134255	2.73774
chr1	111957010	111957914	-	ENSG00000085465	5.79794
chr1	112020724	112021111	+	ENSG00000143110	7.01607
chr1	112026017	112026454	-	ENSG00000121933	3.86437
chr1	112031165	112031737	-	ENSG00000121933	7.0229
chr1	112281658	112281986	-	ENSG00000197852	5.84672
chr1	112297792	112298066	+	ENSG00000064703	3.12559
chr1	112998553	113000793	+	ENSG00000143079	10.2477
chr1	113062886	113063264	+	ENSG00000134245	8.88702
chr1	113161878	113162313	+	ENSG00000116489	1.39429
chr1	113459627	113460534	-	ENSG00000155380	8.18293
chr1	113657081	113657311	+	ENSG00000198799	2.67687
chr1	113661880	113662326	+	ENSG00000198799	5.62126
chr1	113666349	113667244	+	ENSG00000198799	18.8595
chr1	114184375	114185070	+	ENSG00000081026	18.9231
chr1	114239863	114240081	-	ENSG00000116793	2.50936
chr1	114308583	114309147	-	ENSG00000081019	18.0919
chr1	114340018	114340735	-	ENSG00000081019	15.8266
chr1	114380511	114380933	-	ENSG00000134242	5.21633
chr1	114437723	114437971	-	ENSG00000134262	3.31818
chr1	114453787	114455262	+	ENSG00000118655	15.695
chr1	114482922	114484041	+	ENSG00000163349	16.6542
chr1	114523787	114524139	+	ENSG00000116774	2.16846
chr1	115167776	115168764	-	ENSG00000175984	8.69502
chr1	115316702	115317071	-	ENSG00000052723	3.52371
chr1	116206145	116206699	+	ENSG00000173218	15.4941
chr1	116233562	116234602	+	ENSG00000173218	19.7243
chr1	117078568	117078975	-	ENSG00000116815	2.8315
chr1	117117312	117117684	-	ENSG00000143061	3.50803
chr1	117119290	117120317	-	ENSG00000143061	13.1184
chr1	117121876	117122494	-	ENSG00000143061	3.34424
chr1	117127159	117127498	-	ENSG00000143061	3.21005
chr1	117131466	117131775	-	ENSG00000143061	2.10482
chr1	117142656	117142877	-	ENSG00000143061	2.75945
chr1	117146197	117146563	-	ENSG00000143061	2.18961
chr1	117156587	117156971	-	ENSG00000143061	8.18541
chr1	117158563	117159073	-	ENSG00000143061	5.21633
chr1	117208825	117209559	-	ENSG00000143061	10.2902
chr1	117484225	117484618	+	ENSG00000134247	3.74514
chr1	117491750	117492388	+	ENSG00000134247	6.93749
chr1	117503729	117504382	+	ENSG00000134247	22.1506
chr1	117509345	117509953	+	ENSG00000134247	3.76225
chr1	117529369	117530053	+	ENSG00000134247	10.6473
chr1	117568277	117568476	+	ENSG00000134256	1.87095
chr1	117617593	117618424	+	ENSG00000116830	7.06004
chr1	117660737	117661565	-	ENSG00000134253	13.0447
chr1	117944682	117945012	+	ENSG00000198162	1.76491
chr1	118065437	118066135	+	ENSG00000198162	6.82452
chr1	118165914	118166860	+	ENSG00000183508	10.0564
chr1	119426507	119426706	-	ENSG00000092607	2.80643
chr1	119575369	119575978	-	ENSG00000116874	15.6118
chr1	120165033	120166926	-	ENSG00000143067	10.811
chr1	120458907	120459273	-	ENSG00000134250	1.83321
chr1	120466325	120466711	-	ENSG00000134250	4.97929
chr1	120467758	120468421	-	ENSG00000134250	3.32535
chr1	144828488	144829016	+	ENSG00000168614	17.3153
chr1	144851838	144852398	-	ENSG00000178104	11.1466
chr1	144878986	144879185	-	ENSG00000178104	2.33869
chr1	144882407	144882891	-	ENSG00000178104	6.14604
chr1	145075730	145075972	-	ENSG00000178104	3.27416
chr1	145473391	145474532	+	ENSG00000181039	3.02653
chr1	145522415	145522965	+	ENSG00000131779	13.5595
chr1	145542249	145542527	+	ENSG00000143127	4.46622
chr1	145585400	145585660	+	ENSG00000131788	1.9776
chr1	146033823	146034529	-	ENSG00000152042	19.4008
chr1	146374091	146374322	+	ENSG00000186275	1.39925
chr1	146465763	146466509	+	ENSG00000186275	4.64881
chr1	146630971	146631172	-	ENSG00000131791	2.78391
chr1	147090562	147092689	+	ENSG00000116128	11.0271
chr1	147095710	147096956	+	ENSG00000116128	22.6468
chr1	147142190	147142599	-	ENSG00000162836	2.47083
chr1	147228879	147231070	-	ENSG00000143140	9.82516
chr1	147575552	147576078	-	ENSG00000203836	7.02405
chr1	147577541	147577764	-	ENSG00000203836	3.50803
chr1	148251501	148252173	-	ENSG00000203832	12.8486
chr1	148757246	148757525	+	ENSG00000203827	10.758
chr1	149785019	149785218	-	ENSG00000183598	2.57256
chr1	149857398	149857640	-	ENSG00000184678	2.24968
chr1	149871188	149872287	+	ENSG00000178096	13.8265
chr1	149884979	149885524	-	ENSG00000159164	6.08059
chr1	149898344	149899118	-	ENSG00000143368	3.34137
chr1	149915425	149917060	-	ENSG00000163113	21.2733
chr1	150122137	150122340	+	ENSG00000023902	3.67451
chr1	150130986	150131893	+	ENSG00000023902	31.1856
chr1	150280431	150280666	+	ENSG00000187145	1.59767
chr1	150307349	150307797	+	ENSG00000117360	1.86017
chr1	150443098	150445825	+	ENSG00000163125	16.0148
chr1	150479346	150479959	+	ENSG00000143374	7.49551
chr1	150530379	150530649	+	ENSG00000143382	3.74058
chr1	150549408	150550117	-	ENSG00000143384	10.603
chr1	150932928	150933687	+	ENSG00000143379	50.9051
chr1	150974696	150975160	-	ENSG00000143409	12.3435
chr1	150978830	150979312	-	ENSG00000143409	10.0363
chr1	151006335	151007181	+	ENSG00000143363	9.8771
chr1	151025346	151025957	-	ENSG00000197622	6.45121
chr1	151039770	151040052	+	ENSG00000213190	3.27738
chr1	151090361	151090895	+	ENSG00000143458	8.80102
chr1	151104502	151105817	-	ENSG00000143434	19.7039
chr1	151134105	151134527	-	ENSG00000163155	1.44017
chr1	151137681	151138304	-	ENSG00000163155	6.76965
chr1	151171086	151171343	+	ENSG00000143398	3.19685
chr1	151206624	151206831	+	ENSG00000143398	1.50108
chr1	151239593	151239856	+	ENSG00000159352	2.11066
chr1	151258686	151261016	+	ENSG00000143373	19.3376
chr1	151264892	151265461	-	ENSG00000143393	3.60585
chr1	151288052	151289122	-	ENSG00000143393	17.6266
chr1	151314922	151315326	-	ENSG00000143390	2.57591
chr1	151375436	151375741	-	ENSG00000143442	1.42015
chr1	151377213	151378928	-	ENSG00000143442	17.0813
chr1	151491282	151491838	+	ENSG00000143375	6.7822
chr1	151554117	151554675	+	ENSG00000143367	3.51289
chr1	151732223	151732423	-	ENSG00000143436	2.17096
chr1	151846553	151847378	-	ENSG00000159445	11.301
chr1	153651431	153652238	+	ENSG00000169418	5.37898
chr1	153665971	153666382	+	ENSG00000169418	3.0403
chr1	153800352	153800829	-	ENSG00000143614	10.1952
chr1	153954226	153954628	-	ENSG00000143545	1.80598
chr1	154321319	154322010	+	ENSG00000143515	15.8922
chr1	154437573	154438422	+	ENSG00000160712	22.504
chr1	154461388	154461851	-	ENSG00000169291	2.46742
chr1	154474040	154474395	-	ENSG00000169291	4.02669
chr1	154474743	154476166	+	ENSG00000163239	1.3566
chr1	154573530	154575111	-	ENSG00000160710	17.4507
chr1	154680171	154680455	-	ENSG00000143603	2.10482
chr1	154918245	154918884	-	ENSG00000163346	8.03758
chr1	154930881	154931468	-	ENSG00000163348	3.95936
chr1	154931802	154932222	-	ENSG00000163348	2.95217
chr1	155034929	155035219	+	ENSG00000143537	1.82129
chr1	155041360	155041989	+	ENSG00000243364	9.99077
chr1	155106424	155107059	+	ENSG00000169242	4.17087
chr1	155156392	155156780	+	ENSG00000163462	2.55151
chr1	155160690	155161012	-	ENSG00000185499	4.68193
chr1	155178706	155178906	+	ENSG00000173171	2.28429
chr1	155232840	155233040	-	ENSG00000176444	1.66362
chr1	155247370	155247569	+	ENSG00000143630	3.7419
chr1	155257613	155258345	+	ENSG00000143630	9.12088
chr1	155290127	155290416	+	ENSG00000160752	1.74158
chr1	155292369	155292616	+	ENSG00000160753	1.50003
chr1	155307992	155308221	-	ENSG00000116539	1.39092
chr1	155408120	155408899	-	ENSG00000116539	10.8129
chr1	155447538	155448216	-	ENSG00000116539	11.1605
chr1	155448674	155449025	-	ENSG00000116539	2.42829
chr1	155449725	155449931	-	ENSG00000116539	2.34693
chr1	155451016	155452423	-	ENSG00000116539	12.3835
chr1	155490790	155491512	-	ENSG00000116539	18.0496
chr1	155629401	155630002	-	ENSG00000163374	5.27635
chr1	155630209	155630790	-	ENSG00000163374	2.73503
chr1	155707887	155708273	+	ENSG00000132676	3.3228
chr1	155719174	155720650	-	ENSG00000116580	10.0924
chr1	155721437	155722499	-	ENSG00000116580	8.44316
chr1	155722874	155723140	-	ENSG00000116580	2.16831
chr1	155734665	155736488	-	ENSG00000116580	8.85721
chr1	155823070	155823520	-	ENSG00000116580	2.8697
chr1	155837710	155838441	+	ENSG00000132718	14.2663
chr1	155852308	155852531	+	ENSG00000132718	2.27006
chr1	155854491	155854774	+	ENSG00000132718	5.01912
chr1	155882933	155883341	-	ENSG00000132680	3.83541
chr1	155883801	155884001	-	ENSG00000132680	1.71319
chr1	155917434	155917967	-	ENSG00000116584	8.38087
chr1	155920853	155921157	-	ENSG00000116584	1.46817
chr1	155978856	155979200	-	ENSG00000163479	8.99615
chr1	156084532	156084769	+	ENSG00000160789	3.83139
chr1	156146382	156147341	+	ENSG00000196189	5.0157
chr1	156235675	156236332	-	ENSG00000198952	6.7681
chr1	156255230	156255506	+	ENSG00000163472	3.07886
chr1	156261299	156261889	+	ENSG00000163472	3.65819
chr1	156262499	156262959	-	ENSG00000198715	3.99566
chr1	156495922	156496239	-	ENSG00000183856	4.724
chr1	156616496	156616866	+	ENSG00000132692	3.11096
chr1	156639814	156641410	-	ENSG00000132688	9.08359
chr1	156641745	156642826	-	ENSG00000132688	1.71026
chr1	156698319	156699113	+	ENSG00000143303	29.3502
chr1	156703979	156704284	+	ENSG00000143303	3.33519
chr1	156756279	156756893	+	ENSG00000143294	14.6367
chr1	156884277	156884967	+	ENSG00000187800	17.6228
chr1	157093089	157093362	-	ENSG00000117036	2.32923
chr1	157094614	157095916	-	ENSG00000117036	19.3456
chr1	159999303	159999502	-	ENSG00000143315	1.68493
chr1	159999924	160001735	-	ENSG00000143315	16.2211
chr1	160062839	160063135	-	ENSG00000162729	2.30029
chr1	160063406	160063806	-	ENSG00000162729	1.84013
chr1	160209193	160210296	-	ENSG00000132716	15.9985
chr1	160209193	160210296	-	ENSG00000258465	15.9985
chr1	160340434	160340793	+	ENSG00000171786	5.61285
chr1	160967848	160968326	-	ENSG00000270149	4.03274
chr1	160967848	160968326	-	ENSG00000158769	4.03274
chr1	161009162	161010026	-	ENSG00000158773	10.5279
chr1	161017615	161018298	-	ENSG00000186517	4.43101
chr1	161018940	161019190	-	ENSG00000186517	4.08265
chr1	161130499	161130902	+	ENSG00000143258	4.73243
chr1	161160685	161161332	-	ENSG00000158859	14.489
chr1	161168475	161168818	-	ENSG00000158859	4.745
chr1	161198754	161199226	+	ENSG00000158882	4.88979
chr1	161199796	161200521	+	ENSG00000158882	16.2965
chr1	161953537	161954095	-	ENSG00000162745	8.18541
chr1	161967871	161968117	-	ENSG00000162745	4.20964
chr1	161993023	161993276	-	ENSG00000162745	2.57256
chr1	162336793	162337267	+	ENSG00000198929	4.67738
chr1	162351703	162352111	+	ENSG00000239887	3.31166
chr1	162531361	162531762	+	ENSG00000117143	9.36229
chr1	162749870	162750239	+	ENSG00000162733	12.0877
chr1	165877039	165877262	+	ENSG00000143179	3.17168
chr1	166039418	166039959	-	ENSG00000188859	5.84672
chr1	166818222	166820023	+	ENSG00000143157	21.3399
chr1	166821711	166822333	+	ENSG00000143157	11.0094
chr1	167384690	167385526	+	ENSG00000143190	16.8493
chr1	167757045	167757377	+	ENSG00000197965	2.9747
chr1	168053754	168055183	-	ENSG00000143147	29.8884
chr1	168065561	168066361	-	ENSG00000143147	11.8121
chr1	168073654	168073923	-	ENSG00000143147	1.56807
chr1	168211618	168212319	+	ENSG00000213064	14.0708
chr1	169100545	169100799	+	ENSG00000143153	2.23639
chr1	169390613	169391449	-	ENSG00000117477	11.5571
chr1	169434815	169435087	-	ENSG00000117479	1.38214
chr1	169446648	169447009	-	ENSG00000117479	2.26359
chr1	169454652	169455042	-	ENSG00000117479	2.00748
chr1	169558106	169558895	-	ENSG00000174175	6.40482
chr1	169586223	169586763	-	ENSG00000174175	5.0187
chr1	169677657	169677952	-	ENSG00000188404	5.21633
chr1	169761797	169762084	-	ENSG00000171806	2.14549
chr1	169762379	169763128	-	ENSG00000171806	11.0801
chr1	169822538	169822994	-	ENSG00000000457	6.48877
chr1	169823278	169824085	-	ENSG00000000457	5.01891
chr1	170508357	170508558	+	ENSG00000120370	1.80174
chr1	170521124	170521545	+	ENSG00000120370	3.68075
chr1	171501540	171502174	+	ENSG00000117523	8.73962
chr1	171509205	171511325	+	ENSG00000117523	8.93694
chr1	171560737	171561194	+	ENSG00000117523	5.16951
chr1	171752728	171753733	+	ENSG00000010165	8.7238
chr1	172558302	172559043	+	ENSG00000094975	3.32994
chr1	172579024	172579515	+	ENSG00000094975	22.8622
chr1	173009906	173010893	-	ENSG00000120337	9.4534
chr1	173154788	173155965	-	ENSG00000117586	22.7764
chr1	173174319	173174680	-	ENSG00000117586	2.77224
chr1	173702738	173703424	+	ENSG00000076321	11.7728
chr1	173754154	173754865	+	ENSG00000076321	6.23086
chr1	173769133	173769817	-	ENSG00000120334	7.97631
chr1	173771932	173772620	-	ENSG00000120334	14.2985
chr1	173839550	173840209	+	ENSG00000185278	3.44412
chr1	175128700	175130287	-	ENSG00000265365	15.6157
chr1	175161679	175161923	-	ENSG00000235750	1.67278
chr1	176563799	176564074	+	ENSG00000116183	4.67738
chr1	178411723	178412301	+	ENSG00000075391	9.27765
chr1	178426890	178427655	+	ENSG00000075391	10.7948
chr1	178514556	178514818	+	ENSG00000184909	2.33869
chr1	178885307	178886076	+	ENSG00000116191	21.0672
chr1	179012952	179013344	+	ENSG00000116199	6.70499
chr1	179041001	179041832	+	ENSG00000116199	12.1112
chr1	179064115	179064618	+	ENSG00000186283	19.1821
chr1	179076460	179078618	-	ENSG00000143322	22.0073
chr1	179322573	179323121	+	ENSG00000057252	4.44561
chr1	179815128	179815935	-	ENSG00000169905	29.3529
chr1	179820054	179820305	-	ENSG00000169905	1.72753
chr1	179851456	179851718	+	ENSG00000143337	2.87144
chr1	179886739	179887487	+	ENSG00000143337	16.4998
chr1	179965741	179966364	+	ENSG00000135837	11.0889
chr1	179982949	179983605	+	ENSG00000135837	1.89614
chr1	179989090	179990186	+	ENSG00000135837	1.88594
chr1	180062561	180063311	+	ENSG00000135837	3.84937
chr1	180063508	180063768	+	ENSG00000135837	1.45685
chr1	180064608	180064860	+	ENSG00000135837	1.93051
chr1	180080068	180081134	+	ENSG00000135837	11.5264
chr1	180081432	180081676	+	ENSG00000135837	2.66743
chr1	180166434	180166819	+	ENSG00000116260	1.6449
chr1	180471293	180471933	-	ENSG00000135847	7.4741
chr1	180853095	180853722	+	ENSG00000143324	14.3239
chr1	180885420	180885944	+	ENSG00000135835	2.33869
chr1	180904363	180905351	+	ENSG00000135835	4.91125
chr1	180915338	180915798	+	ENSG00000135835	3.50803
chr1	180919235	180920059	+	ENSG00000135835	14.6901
chr1	180942737	180942942	-	ENSG00000135823	2.31029
chr1	180945157	180945873	-	ENSG00000135823	18.2482
chr1	180991698	180991975	-	ENSG00000135823	1.61983
chr1	181057949	181059779	+	ENSG00000162783	21.602
chr1	182353530	182353893	-	ENSG00000135821	1.86898
chr1	182554541	182555979	-	ENSG00000135828	6.08059
chr1	182992593	182993401	+	ENSG00000135862	7.26203
chr1	183111588	183112396	+	ENSG00000135862	15.3379
chr1	183212196	183213184	+	ENSG00000058085	9.31805
chr1	183219225	183219435	-	ENSG00000157064	2.80643
chr1	183522070	183522356	+	ENSG00000116698	3.48899
chr1	183895075	183896268	+	ENSG00000143344	16.7373
chr1	184663051	184663617	-	ENSG00000116406	10.2192
chr1	184763918	184765100	-	ENSG00000135842	7.15123
chr1	185143488	185144344	+	ENSG00000116668	10.8723
chr1	186158551	186159087	+	ENSG00000143341	27.2508
chr1	186643557	186643781	-	ENSG00000073756	2.64166
chr1	193038103	193038445	+	ENSG00000116747	2.89639
chr1	197069739	197070920	-	ENSG00000066279	7.39756
chr1	197071071	197071355	-	ENSG00000066279	1.61339
chr1	197073341	197073940	-	ENSG00000066279	7.32981
chr1	197128327	197129203	-	ENSG00000177888	37.2169
chr1	197168579	197169130	-	ENSG00000177888	3.51298
chr1	197479519	197480180	-	ENSG00000213047	10.1196
chr1	197480766	197481045	-	ENSG00000213047	2.00673
chr1	200017188	200017952	+	ENSG00000116833	21.8652
chr1	200143119	200143951	+	ENSG00000116833	20.8213
chr1	200376049	200379110	-	ENSG00000162702	14.4346
chr1	200522302	200522896	-	ENSG00000118193	3.71405
chr1	200586787	200587961	-	ENSG00000118193	12.6774
chr1	200589653	200589855	-	ENSG00000118193	2.509
chr1	200635036	200635769	-	ENSG00000118197	2.89351
chr1	200817136	200819233	+	ENSG00000118200	11.0731
chr1	201434793	201435415	-	ENSG00000174307	4.37073
chr1	201453577	201453810	-	ENSG00000159176	1.71318
chr1	201591835	201592774	+	ENSG00000269690	13.0356
chr1	201617675	201618488	+	ENSG00000134369	9.39145
chr1	201750197	201750493	+	ENSG00000134369	2.07472
chr1	201751263	201752099	+	ENSG00000134369	5.1236
chr1	201752351	201752901	+	ENSG00000134369	3.10371
chr1	201788947	201789752	+	ENSG00000134369	19.289
chr1	201790295	201792313	+	ENSG00000134369	16.7073
chr1	201845006	201845795	+	ENSG00000198700	12.6711
chr1	201846616	201848590	+	ENSG00000198700	5.36281
chr1	201868553	201868912	-	ENSG00000163431	1.83933
chr1	201869192	201869728	-	ENSG00000163431	3.50803
chr1	201915136	201915335	-	ENSG00000163431	1.87095
chr1	202116264	202117656	-	ENSG00000143851	6.44445
chr1	202555252	202555479	+	ENSG00000077157	2.82824
chr1	202697857	202698392	-	ENSG00000117139	9.01102
chr1	202698659	202699222	-	ENSG00000117139	11.9272
chr1	202702435	202702908	-	ENSG00000117139	2.09417
chr1	202910415	202910665	-	ENSG00000159346	1.50347
chr1	203652007	203652609	+	ENSG00000058668	11.2372
chr1	203708682	203709269	+	ENSG00000058668	5.97461
chr1	203765370	203765629	+	ENSG00000058673	1.90346
chr1	203765370	203765629	+	ENSG00000257315	1.90346
chr1	203766071	203766952	+	ENSG00000257315	8.48185
chr1	203767501	203768455	+	ENSG00000257315	7.7443
chr1	203768739	203769504	+	ENSG00000257315	2.10573
chr1	203816207	203816803	+	ENSG00000058673	3.88437
chr1	204094885	204095662	+	ENSG00000143842	39.9034
chr1	204190385	204191878	-	ENSG00000143850	30.1088
chr1	204228502	204228765	-	ENSG00000143850	6.89862
chr1	204375158	204375568	-	ENSG00000158615	4.10254
chr1	204378452	204381049	-	ENSG00000158615	19.08
chr1	204438058	204439007	-	ENSG00000133056	16.544
chr1	204518242	204518902	+	ENSG00000198625	34.5339
chr1	205052517	205053531	-	ENSG00000174529	7.82357
chr1	205057700	205058068	-	ENSG00000117222	3.77287
chr1	205116353	205116933	-	ENSG00000133059	10.0144
chr1	205138362	205139146	-	ENSG00000133059	20.1935
chr1	205156370	205156996	-	ENSG00000133059	10.5257
chr1	205197254	205197714	+	ENSG00000133069	11.6261
chr1	205210872	205211306	+	ENSG00000133069	3.67946
chr1	205237994	205239109	+	ENSG00000133069	37.5322
chr1	205271324	205271832	-	ENSG00000163545	3.97577
chr1	205272099	205273543	-	ENSG00000163545	8.18541
chr1	205569698	205570236	+	ENSG00000174514	4.36118
chr1	205589012	205589974	-	ENSG00000158711	14.6581
chr1	205631894	205632876	-	ENSG00000158715	20.5559
chr1	205738382	205738925	-	ENSG00000117280	5.61206
chr1	205739257	205739526	-	ENSG00000117280	1.82131
chr1	205781846	205782157	-	ENSG00000133065	1.90179
chr1	206634456	206634977	+	ENSG00000163486	3.33261
chr1	206636775	206637614	+	ENSG00000163486	5.05098
chr1	206669483	206669914	+	ENSG00000143466	4.71169
chr1	206760396	206760639	+	ENSG00000136653	3.27416
chr1	206808919	206809161	+	ENSG00000143479	1.69399
chr1	206820727	206822133	+	ENSG00000143479	18.783
chr1	206905819	206906395	+	ENSG00000162889	7.33988
chr1	207221801	207223074	-	ENSG00000180667	14.762
chr1	207223923	207224202	-	ENSG00000180667	2.59263
chr1	208060754	208061296	-	ENSG00000174059	9.38499
chr1	208195899	208196819	-	ENSG00000076356	8.32553
chr1	208197391	208198296	-	ENSG00000076356	4.19938
chr1	208198623	208200771	-	ENSG00000076356	15.61
chr1	208389888	208391542	-	ENSG00000076356	40.7558
chr1	208416799	208417700	-	ENSG00000076356	18.847
chr1	209788266	209788512	-	ENSG00000196878	6.62073
chr1	209956038	209957093	-	ENSG00000162757	17.7694
chr1	209963808	209964116	-	ENSG00000117595	2.85816
chr1	210010253	210010478	+	ENSG00000117597	1.81602
chr1	210273288	210273934	+	ENSG00000143469	7.20746
chr1	210333944	210334446	+	ENSG00000143469	8.88695
chr1	210414911	210415877	+	ENSG00000082497	9.74654
chr1	210847573	210847928	+	ENSG00000054392	5.35078
chr1	211545485	211546141	+	ENSG00000082512	31.0933
chr1	211547332	211548020	+	ENSG00000082512	10.8602
chr1	211748647	211749763	-	ENSG00000170385	22.6056
chr1	211751225	211751833	-	ENSG00000170385	5.62074
chr1	212115002	212115558	-	ENSG00000143493	8.86461
chr1	212273897	212274504	+	ENSG00000143476	5.17946
chr1	212458887	212459099	+	ENSG00000066027	2.77098
chr1	212502420	212502740	+	ENSG00000066027	1.65549
chr1	212502420	212502740	+	ENSG00000270045	1.65549
chr1	212538255	212538702	-	ENSG00000065600	6.25477
chr1	212911706	212912083	-	ENSG00000117697	3.81263
chr1	213031559	213032768	+	ENSG00000162769	38.8311
chr1	213145937	213146235	+	ENSG00000143494	3.7419
chr1	213188915	213189116	-	ENSG00000174606	2.86063
chr1	213414208	213415640	+	ENSG00000136643	14.6814
chr1	213445897	213446167	+	ENSG00000136643	2.36631
chr1	214169716	214171489	+	ENSG00000117707	13.3445
chr1	214556591	214558140	-	ENSG00000152104	10.5662
chr1	214813437	214813988	+	ENSG00000117724	4.47113
chr1	214814268	214815040	+	ENSG00000117724	1.64639
chr1	214815183	214816828	+	ENSG00000117724	6.6972
chr1	214817753	214820812	+	ENSG00000117724	6.93173
chr1	214830236	214830544	+	ENSG00000117724	2.28698
chr1	214836790	214837177	+	ENSG00000117724	1.81658
chr1	215793277	215793895	+	ENSG00000136636	3.39951
chr1	217793082	217793897	-	ENSG00000092978	26.0791
chr1	218504170	218504420	+	ENSG00000067533	2.48327
chr1	218519604	218520324	+	ENSG00000092969	8.02792
chr1	218614551	218615402	+	ENSG00000092969	6.11804
chr1	220835156	220835533	+	ENSG00000116141	8.11907
chr1	220863750	220864229	+	ENSG00000162817	8.99378
chr1	220869931	220871912	+	ENSG00000162817	5.19291
chr1	221052001	221053294	+	ENSG00000136630	2.90294
chr1	221057393	221058373	+	ENSG00000136630	18.2704
chr1	221875431	221876018	-	ENSG00000143507	2.69187
chr1	221879366	221879870	-	ENSG00000143507	2.44647
chr1	221912288	221913175	-	ENSG00000143507	8.73806
chr1	222800912	222801956	+	ENSG00000154305	5.40792
chr1	222802142	222803560	+	ENSG00000154305	10.5669
chr1	222838614	222838971	+	ENSG00000154305	5.00015
chr1	222885870	222886176	+	ENSG00000162819	2.3728
chr1	223283729	223283928	-	ENSG00000187554	2.57256
chr1	223968110	223968698	-	ENSG00000143514	9.47775
chr1	223983619	223984337	-	ENSG00000143514	9.18491
chr1	223985747	223986329	-	ENSG00000143514	3.12395
chr1	224345026	224345741	+	ENSG00000143756	13.4469
chr1	224377200	224378182	+	ENSG00000143753	2.66693
chr1	224415169	224415372	-	ENSG00000143748	3.54675
chr1	224577125	224577736	-	ENSG00000162923	19.1761
chr1	225685155	225685614	-	ENSG00000154380	6.37507
chr1	225706819	225707310	-	ENSG00000154380	5.86079
chr1	226034304	226034805	-	ENSG00000196187	5.33525
chr1	226175418	226176136	-	ENSG00000143751	20.6752
chr1	226339887	226340430	-	ENSG00000182827	13.5246
chr1	226413217	226413710	+	ENSG00000185155	10.8339
chr1	226420042	226420274	-	ENSG00000183814	2.00768
chr1	226923234	226925093	-	ENSG00000143772	25.4766
chr1	227083069	227083732	+	ENSG00000143801	10.6641
chr1	227181688	227182100	-	ENSG00000143776	7.36199
chr1	227216366	227217010	-	ENSG00000143776	10.903
chr1	227505326	227506163	-	ENSG00000143776	18.1803
chr1	227919062	227919365	-	ENSG00000081692	1.93588
chr1	227935446	227936089	+	ENSG00000143740	8.54295
chr1	227946543	227947058	+	ENSG00000143740	3.63132
chr1	227968203	227968868	+	ENSG00000143740	17.4112
chr1	228108196	228108895	-	ENSG00000143816	3.50803
chr1	228109251	228109797	-	ENSG00000143816	9.5744
chr1	228112905	228113143	-	ENSG00000143816	2.80879
chr1	228291516	228292395	-	ENSG00000143793	8.37278
chr1	228345863	228346733	+	ENSG00000198835	18.4756
chr1	228353693	228353950	+	ENSG00000181873	2.09083
chr1	228471216	228471560	+	ENSG00000154358	2.50818
chr1	228644871	228645392	-	ENSG00000181218	7.37268
chr1	228879116	228879549	+	ENSG00000116574	4.45996
chr1	229462328	229462752	-	ENSG00000154429	8.78006
chr1	229653810	229654163	-	ENSG00000135776	5.96553
chr1	229729616	229731031	-	ENSG00000135801	37.3843
chr1	229737749	229738593	-	ENSG00000135801	9.57964
chr1	229770761	229774058	+	ENSG00000135763	21.7935
chr1	229794835	229795103	+	ENSG00000135763	2.32875
chr1	230458661	230459325	-	ENSG00000177614	10.2902
chr1	230829027	230829380	+	ENSG00000135775	3.29845
chr1	230979116	230979455	-	ENSG00000119280	2.99748
chr1	231135906	231136264	+	ENSG00000173409	4.7683
chr1	231155330	231155982	-	ENSG00000182118	24.9408
chr1	231374632	231374956	-	ENSG00000143633	2.88601
chr1	231413271	231413472	+	ENSG00000116906	1.59907
chr1	231471319	231473583	-	ENSG00000116903	28.5043
chr1	231487026	231487481	+	ENSG00000010072	2.47285
chr1	231501862	231502345	-	ENSG00000135766	3.05815
chr1	231556668	231557188	-	ENSG00000135766	7.51484
chr1	231557340	231557968	-	ENSG00000135766	4.83614
chr1	231829613	231830614	+	ENSG00000162946	7.61063
chr1	231829613	231830614	+	ENSG00000270106	7.61063
chr1	232172414	232173346	+	ENSG00000162946	5.5204
chr1	232534606	232534870	-	ENSG00000116991	2.37061
chr1	232600619	232601249	-	ENSG00000116991	7.94379
chr1	232649704	232651179	-	ENSG00000116991	8.76237
chr1	232941514	232943921	+	ENSG00000212916	7.45767
chr1	233393757	233395234	-	ENSG00000135749	14.5612
chr1	233430969	233431259	-	ENSG00000135749	2.67539
chr1	233463507	233463784	+	ENSG00000143674	5.84672
chr1	233514881	233515578	+	ENSG00000143674	3.97577
chr1	233517889	233518580	+	ENSG00000143674	19.4111
chr1	233807117	233807345	+	ENSG00000135750	2.18477
chr1	234614268	234614497	-	ENSG00000059588	3.7419
chr1	234614652	234614873	-	ENSG00000059588	4.67738
chr1	234742706	234743689	-	ENSG00000168264	37.1622
chr1	234744025	234745272	-	ENSG00000168264	5.57268
chr1	235294978	235295406	-	ENSG00000188739	10.2558
chr1	235331545	235331996	-	ENSG00000054267	2.15488
chr1	235345180	235345925	-	ENSG00000054267	11.5351
chr1	235505357	235505743	+	ENSG00000152904	3.60017
chr1	235613459	235613700	-	ENSG00000162885	1.96649
chr1	235922444	235923070	-	ENSG00000143669	6.68994
chr1	235969192	235969900	-	ENSG00000143669	4.81507
chr1	235971939	235972612	-	ENSG00000143669	9.26004
chr1	235972826	235973762	-	ENSG00000143669	6.52127
chr1	236140956	236141216	-	ENSG00000116962	3.69331
chr1	236714661	236715253	+	ENSG00000116977	5.42187
chr1	237057516	237057875	+	ENSG00000116984	1.90734
chr1	237058620	237058911	+	ENSG00000116984	1.38267
chr1	237060786	237061641	+	ENSG00000116984	9.22716
chr1	237062143	237062727	+	ENSG00000116984	6.07315
chr1	237066638	237067146	+	ENSG00000116984	9.42694
chr1	241796953	241799417	-	ENSG00000203668	11.2707
chr1	241802997	241803498	-	ENSG00000054277	4.01525
chr1	242041991	242042342	+	ENSG00000174371	4.68347
chr1	243327583	243329412	-	ENSG00000143702	5.55468
chr1	243354289	243354795	-	ENSG00000143702	5.70818
chr1	244216940	244218685	+	ENSG00000179456	22.1662
chr1	244715756	244715956	+	ENSG00000179397	3.0403
chr1	244724068	244724295	+	ENSG00000179397	3.27416
chr1	244868864	244869296	+	ENSG00000121644	8.39135
chr1	245026976	245027645	-	ENSG00000153187	2.44434
chr1	245318313	245318823	+	ENSG00000162849	6.54833
chr1	245530250	245530564	+	ENSG00000162849	4.91125
chr1	245848742	245849194	+	ENSG00000162849	4.41382
chr1	245849805	245851608	+	ENSG00000162849	8.28625
chr1	245865762	245866397	+	ENSG00000162849	23.0722
chr1	246754838	246755248	+	ENSG00000162852	7.90723
chr1	246810400	246811423	+	ENSG00000162852	24.4548
chr1	247012935	247013447	-	ENSG00000153207	7.46289
chr1	247013857	247014758	-	ENSG00000153207	9.33722
chr1	247285949	247287261	-	ENSG00000196418	6.60811
chr1	247587337	247587612	+	ENSG00000162711	3.27416
chr1	247588240	247588775	+	ENSG00000162711	3.7419
chr1	248039225	248039608	+	ENSG00000162722	4.58681
chr1	248058881	248059912	+	ENSG00000238243	3.97577
chr1	249105468	249105801	-	ENSG00000175137	4.95396
chr1	249106032	249106725	-	ENSG00000175137	10.1046
chr1	249119134	249119625	-	ENSG00000175137	5.14375
chr1	249144217	249144516	-	ENSG00000171163	5.68653
chr1	249210828	249212726	+	ENSG00000185220	32.5334
chr10	180242	180754	+	ENSG00000015171	5.84672
chr10	322895	323491	-	ENSG00000151240	13.3622
chr10	858847	859230	-	ENSG00000107929	2.35427
chr10	3823674	3824547	-	ENSG00000067082	13.6234
chr10	5498644	5499040	+	ENSG00000173848	8.70039
chr10	5680954	5681709	-	ENSG00000196372	10.3457
chr10	5681860	5682846	-	ENSG00000196372	22.7181
chr10	5772465	5773249	+	ENSG00000108021	3.71203
chr10	5781518	5782416	+	ENSG00000108021	6.07609
chr10	5784170	5784663	+	ENSG00000108021	2.91894
chr10	5788041	5789253	+	ENSG00000108021	14.6565
chr10	5790577	5791781	+	ENSG00000108021	15.071
chr10	5904025	5904531	-	ENSG00000134461	5.84672
chr10	5947852	5948568	+	ENSG00000134452	9.14767
chr10	5979188	5979443	+	ENSG00000134452	4.09353
chr10	5994469	5995279	-	ENSG00000134470	4.14087
chr10	6244927	6245131	+	ENSG00000170525	5.01815
chr10	6469202	6469503	-	ENSG00000065675	3.7419
chr10	6469677	6470481	-	ENSG00000065675	8.15291
chr10	7201920	7203318	-	ENSG00000198879	9.36387
chr10	7203631	7204770	-	ENSG00000198879	4.7872
chr10	7205274	7205751	-	ENSG00000198879	2.17375
chr10	8005903	8007810	+	ENSG00000165632	9.05329
chr10	8056467	8057023	+	ENSG00000165632	12.502
chr10	8115987	8116504	+	ENSG00000107485	3.67604
chr10	11504009	11505845	-	ENSG00000148429	19.1822
chr10	11805418	11805953	+	ENSG00000134463	9.03029
chr10	11962564	11963288	-	ENSG00000151461	7.14769
chr10	12070584	12071642	-	ENSG00000151461	16.9737
chr10	12076868	12077526	-	ENSG00000151461	11.0828
chr10	12162884	12163936	+	ENSG00000181192	9.32847
chr10	12391469	12391722	+	ENSG00000183049	5.85242
chr10	12870675	12871247	+	ENSG00000183049	21.7296
chr10	12876116	12876602	+	ENSG00000183049	2.66742
chr10	13541645	13542172	-	ENSG00000165626	8.81315
chr10	13672176	13672565	+	ENSG00000165630	2.28152
chr10	13686990	13687312	-	ENSG00000151474	3.86413
chr10	13687923	13689035	-	ENSG00000151474	19.4173
chr10	13698717	13699632	-	ENSG00000151474	7.80393
chr10	14562721	14563383	-	ENSG00000065809	11.0787
chr10	15150124	15150503	-	ENSG00000152465	2.92727
chr10	15254437	15256571	-	ENSG00000148468	32.6542
chr10	15558595	15559179	-	ENSG00000077943	5.61285
chr10	15902185	15902482	-	ENSG00000148481	5.2925
chr10	16526394	16526733	+	ENSG00000165983	3.0101
chr10	16632777	16633320	-	ENSG00000148484	1.9334
chr10	16633542	16634151	-	ENSG00000148484	3.05859
chr10	16866717	16867076	-	ENSG00000107611	1.6686
chr10	17184052	17185176	-	ENSG00000107614	14.8523
chr10	17189567	17190055	-	ENSG00000107614	7.50363
chr10	17362560	17363389	-	ENSG00000148488	26.8934
chr10	17756535	17757119	+	ENSG00000136738	7.01492
chr10	18964013	18964302	+	ENSG00000165997	2.29463
chr10	20105661	20106177	+	ENSG00000120594	3.45722
chr10	20568518	20569497	+	ENSG00000120594	12.1696
chr10	21783236	21784981	-	ENSG00000204682	15.1563
chr10	21785538	21786090	-	ENSG00000204682	3.42897
chr10	21803579	21806868	-	ENSG00000180592	21.8418
chr10	21807902	21808523	-	ENSG00000180592	6.54833
chr10	21962178	21962571	+	ENSG00000078403	3.15158
chr10	22048231	22048576	-	ENSG00000136770	1.52748
chr10	22610183	22610566	+	ENSG00000168283	1.58052
chr10	22825834	22826377	-	ENSG00000150867	6.85127
chr10	23410003	23410857	+	ENSG00000148450	12.7822
chr10	23728863	23729991	+	ENSG00000165312	25.1891
chr10	24762311	24762983	+	ENSG00000120549	19.1667
chr10	24831865	24833361	+	ENSG00000120549	8.28446
chr10	24873227	24875059	-	ENSG00000107863	30.6317
chr10	24908540	24910308	-	ENSG00000107863	17.4434
chr10	25010665	25011088	-	ENSG00000107863	1.98044
chr10	25304759	25305144	-	ENSG00000151023	3.7419
chr10	25312169	25313138	+	ENSG00000185875	12.2035
chr10	27323918	27324698	-	ENSG00000107890	11.2021
chr10	27443699	27444509	+	ENSG00000120539	6.13848
chr10	27458793	27459703	+	ENSG00000120539	9.03442
chr10	28884528	28884968	+	ENSG00000095787	5.56588
chr10	28908449	28908786	+	ENSG00000095787	2.4516
chr10	28966450	28966681	+	ENSG00000095739	8.25811
chr10	28970179	28970633	+	ENSG00000095739	6.43546
chr10	28970924	28971641	+	ENSG00000095739	23.5156
chr10	29812265	29812944	-	ENSG00000197321	5.90015
chr10	29821374	29821992	-	ENSG00000197321	5.24687
chr10	29839587	29840163	-	ENSG00000197321	5.82179
chr10	30303498	30303968	-	ENSG00000165757	6.15833
chr10	30306433	30307014	-	ENSG00000165757	3.56622
chr10	30314898	30318939	-	ENSG00000165757	14.3505
chr10	30602173	30602929	-	ENSG00000107951	17.6314
chr10	30727774	30728295	+	ENSG00000107968	7.56541
chr10	31133749	31134547	-	ENSG00000183621	21.448
chr10	31137283	31139276	-	ENSG00000183621	7.28958
chr10	31650002	31650819	-	ENSG00000196960	1.94042
chr10	31652712	31653047	-	ENSG00000196960	3.27522
chr10	31809055	31809526	+	ENSG00000148516	3.95261
chr10	31810065	31810887	+	ENSG00000148516	13.999
chr10	31815600	31816348	+	ENSG00000148516	11.8412
chr10	32197073	32197909	-	ENSG00000165322	18.3275
chr10	32560338	32561049	-	ENSG00000120616	13.5399
chr10	32573538	32574063	-	ENSG00000120616	2.39978
chr10	33468173	33469445	-	ENSG00000099250	23.9395
chr10	34399812	34400478	-	ENSG00000148498	15.4329
chr10	34605942	34606236	-	ENSG00000148498	2.16328
chr10	34671533	34671836	-	ENSG00000148498	2.70332
chr10	35298977	35299248	-	ENSG00000108094	2.25669
chr10	35857906	35858478	+	ENSG00000108100	3.85578
chr10	35927873	35928282	-	ENSG00000177283	3.67798
chr10	35928457	35929199	-	ENSG00000177283	7.75452
chr10	35929346	35929683	-	ENSG00000177283	5.30463
chr10	38091532	38092537	-	ENSG00000198105	9.12088
chr10	38352940	38353284	+	ENSG00000189180	6.01163
chr10	38406389	38408265	+	ENSG00000075407	15.2111
chr10	38411008	38412134	+	ENSG00000075407	9.19425
chr10	43078230	43078533	-	ENSG00000196693	3.50803
chr10	43291924	43292327	+	ENSG00000165733	3.88179
chr10	43650348	43651255	+	ENSG00000169826	6.30089
chr10	43882126	43883380	-	ENSG00000169813	14.2327
chr10	44052841	44053435	-	ENSG00000196793	3.0403
chr10	44111810	44112754	+	ENSG00000198298	4.91125
chr10	44139368	44140159	-	ENSG00000169740	3.13329
chr10	45489367	45490049	+	ENSG00000107551	3.92305
chr10	45498689	45499908	+	ENSG00000165512	4.6989
chr10	45500181	45500604	+	ENSG00000165512	4.7255
chr10	45953073	45954144	-	ENSG00000165406	10.5928
chr10	46121392	46122398	-	ENSG00000172671	19.6615
chr10	46284286	46284617	+	ENSG00000172661	3.02659
chr10	46963700	46964007	-	ENSG00000204176	6.9663
chr10	46967325	46967780	-	ENSG00000204176	1.5054
chr10	47192228	47192485	-	ENSG00000204172	3.7419
chr10	47219700	47220135	-	ENSG00000204172	41.8625
chr10	47220631	47220830	-	ENSG00000204172	2.33869
chr10	47945495	47945802	+	ENSG00000152726	3.00981
chr10	48236277	48237322	+	ENSG00000198035	3.12197
chr10	49658126	49659291	-	ENSG00000128805	26.9023
chr10	49863338	49864124	-	ENSG00000128805	17.811
chr10	50190431	50190877	+	ENSG00000128815	6.73688
chr10	50226487	50227573	-	ENSG00000165633	24.7901
chr10	50362829	50364057	-	ENSG00000204161	10.0077
chr10	50666767	50667411	-	ENSG00000225830	11.2148
chr10	50678215	50678830	-	ENSG00000225830	10.9668
chr10	50723326	50725327	-	ENSG00000258838	10.8816
chr10	50723326	50725327	-	ENSG00000243251	10.8816
chr10	50731939	50732746	-	ENSG00000225830	24.1303
chr10	50731939	50732746	-	ENSG00000258838	24.1303
chr10	50731939	50732746	-	ENSG00000243251	24.1303
chr10	51224771	51226476	-	ENSG00000174194	10.9778
chr10	51464136	51465854	-	ENSG00000204169	32.7416
chr10	51584829	51585460	+	ENSG00000138293	2.30513
chr10	51592229	51592454	-	ENSG00000138297	2.9987
chr10	51768769	51770173	+	ENSG00000204149	20.6778
chr10	52066621	52067079	-	ENSG00000198964	9.67696
chr10	52103229	52104179	-	ENSG00000198964	25.4658
chr10	53457684	53459353	-	ENSG00000177613	14.9978
chr10	54053582	54053816	+	ENSG00000185532	3.11096
chr10	54076357	54076729	+	ENSG00000107984	3.03919
chr10	55566306	55566850	-	ENSG00000150275	5.84672
chr10	58117633	58118141	-	ENSG00000122952	3.8901
chr10	59955799	59956514	-	ENSG00000151151	17.7216
chr10	60588413	60588930	+	ENSG00000122870	16.9954
chr10	61412132	61412405	-	ENSG00000165449	1.90374
chr10	61413296	61414287	-	ENSG00000165449	11.9649
chr10	61469224	61469594	-	ENSG00000165449	2.00687
chr10	61548739	61549062	-	ENSG00000108091	2.41922
chr10	61788993	61789249	-	ENSG00000151150	2.96351
chr10	61815524	61815888	-	ENSG00000151150	2.45298
chr10	62648022	62648753	-	ENSG00000072422	7.57162
chr10	63169558	63170379	-	ENSG00000196932	4.91125
chr10	63850528	63853385	+	ENSG00000150347	16.5835
chr10	64135957	64136828	+	ENSG00000138311	16.1925
chr10	64564801	64565998	+	ENSG00000181915	13.4249
chr10	64913320	64914556	+	ENSG00000148572	16.4527
chr10	64966369	64966925	-	ENSG00000171988	3.88785
chr10	64967236	64967857	-	ENSG00000171988	2.5784
chr10	64968226	64968484	-	ENSG00000171988	1.78841
chr10	64973283	64973859	-	ENSG00000171988	2.87538
chr10	64974082	64974284	-	ENSG00000171988	1.39862
chr10	64974445	64975349	-	ENSG00000171988	8.39463
chr10	69672283	69672937	+	ENSG00000096717	5.61928
chr10	69675862	69676446	+	ENSG00000096717	7.52904
chr10	69933823	69934309	+	ENSG00000138347	6.31446
chr10	70404680	70404879	+	ENSG00000138336	2.10482
chr10	70406532	70406764	+	ENSG00000138336	3.7419
chr10	70450766	70451571	+	ENSG00000138336	4.67738
chr10	70719559	70719973	+	ENSG00000165732	3.12469
chr10	70742249	70742670	+	ENSG00000165732	2.75756
chr10	70883274	70883741	+	ENSG00000122958	2.63768
chr10	70968388	70968773	+	ENSG00000156502	13.0826
chr10	71561633	71562467	+	ENSG00000197467	41.0054
chr10	71899010	71899904	-	ENSG00000156521	6.29966
chr10	71911936	71912463	-	ENSG00000079332	5.62873
chr10	72059385	72061130	-	ENSG00000172731	5.0665
chr10	72195026	72195719	-	ENSG00000156574	5.84672
chr10	72195026	72195719	+	ENSG00000197604	5.84672
chr10	72326297	72326876	+	ENSG00000107719	6.95966
chr10	72327017	72327723	+	ENSG00000107719	2.5295
chr10	73058843	73059120	+	ENSG00000107731	3.61388
chr10	73082477	73082914	+	ENSG00000198246	3.8359
chr10	73121894	73123071	+	ENSG00000198246	22.4105
chr10	73510104	73511038	-	ENSG00000107738	33.8253
chr10	73767339	73769270	+	ENSG00000122863	22.0552
chr10	73770042	73771405	+	ENSG00000122863	20.2248
chr10	73772348	73772866	+	ENSG00000122863	2.23877
chr10	74093996	74094570	-	ENSG00000148719	7.21471
chr10	74127309	74128133	-	ENSG00000107745	4.99342
chr10	75002790	75002997	+	ENSG00000138286	1.4951
chr10	75002790	75002997	-	ENSG00000213551	1.4951
chr10	75258199	75259029	-	ENSG00000166348	5.01885
chr10	75276244	75277307	-	ENSG00000166348	13.8556
chr10	75434102	75435423	-	ENSG00000172650	15.7231
chr10	75531470	75531829	+	ENSG00000176986	3.54171
chr10	75551634	75552513	+	ENSG00000214655	6.7432
chr10	75561287	75561499	-	ENSG00000166507	2.42751
chr10	75561287	75561499	+	ENSG00000214655	2.42751
chr10	75566942	75568569	-	ENSG00000166507	19.8875
chr10	75572458	75573032	-	ENSG00000148660	1.69772
chr10	75573354	75574316	-	ENSG00000148660	21.7393
chr10	75676238	75676708	+	ENSG00000122861	6.34985
chr10	75877830	75878303	+	ENSG00000035403	4.12585
chr10	76586395	76586647	+	ENSG00000156650	4.73015
chr10	76602425	76603211	+	ENSG00000156650	11.9776
chr10	76781780	76782104	+	ENSG00000156650	1.98192
chr10	76784582	76785152	+	ENSG00000156650	1.51691
chr10	76788149	76789408	+	ENSG00000156650	5.91749
chr10	76789698	76791088	+	ENSG00000156650	30.4856
chr10	76910162	76910846	+	ENSG00000156671	13.0816
chr10	76993750	76993959	-	ENSG00000165644	2.67578
chr10	77158036	77160271	-	ENSG00000165655	36.3789
chr10	77160707	77161100	-	ENSG00000165655	2.58129
chr10	79551362	79552302	-	ENSG00000151208	13.4388
chr10	79581045	79581945	-	ENSG00000151208	20.3766
chr10	79736923	79737344	-	ENSG00000148606	3.96067
chr10	79795242	79795614	+	ENSG00000138326	2.63541
chr10	81070765	81071078	+	ENSG00000108175	2.87209
chr10	81072337	81073731	+	ENSG00000108175	30.2788
chr10	81074989	81075442	+	ENSG00000108175	6.97951
chr10	81142249	81142720	-	ENSG00000165424	3.74398
chr10	81463379	81463813	+	ENSG00000188199	6.7822
chr10	81465906	81466110	+	ENSG00000188199	2.57256
chr10	81601443	81601650	+	ENSG00000228570	6.08059
chr10	81609545	81609993	+	ENSG00000228570	6.31446
chr10	81697385	81697953	-	ENSG00000133661	5.37898
chr10	81915458	81915713	-	ENSG00000122359	2.10948
chr10	84744713	84745516	+	ENSG00000185737	17.6047
chr10	86130692	86132124	+	ENSG00000107771	10.5076
chr10	86273199	86274119	+	ENSG00000107771	12.7793
chr10	88259359	88260673	-	ENSG00000062650	21.8927
chr10	88277204	88277894	-	ENSG00000062650	6.35113
chr10	88280986	88281350	-	ENSG00000062650	1.53048
chr10	88683394	88684011	+	ENSG00000107779	5.14511
chr10	88701898	88704088	-	ENSG00000173269	41.6926
chr10	88911132	88912665	+	ENSG00000122376	6.79541
chr10	88988133	88988334	+	ENSG00000184923	4.6703
chr10	88992447	88992982	+	ENSG00000184923	6.31446
chr10	88993814	88994094	+	ENSG00000184923	12.8628
chr10	89117782	89118150	+	ENSG00000214562	4.93437
chr10	89264648	89265313	+	ENSG00000107789	4.42621
chr10	89311798	89312802	+	ENSG00000107789	6.09296
chr10	89622538	89622894	-	ENSG00000227268	3.30823
chr10	89623873	89624498	+	ENSG00000171862	4.43377
chr10	89725164	89725398	+	ENSG00000171862	2.08308
chr10	90343665	90343864	-	ENSG00000184719	2.57256
chr10	90773935	90774325	+	ENSG00000026103	4.47771
chr10	90966104	90966678	-	ENSG00000138135	17.3063
chr10	91065858	91066353	+	ENSG00000119922	3.97577
chr10	91066707	91067457	+	ENSG00000119922	13.0967
chr10	91098539	91100291	+	ENSG00000119917	10.4995
chr10	91162325	91162611	+	ENSG00000185745	2.80643
chr10	91177004	91178375	+	ENSG00000152778	12.7342
chr10	91371394	91371932	-	ENSG00000152782	11.3704
chr10	91497049	91498327	+	ENSG00000138182	7.40925
chr10	92500756	92501052	-	ENSG00000148680	4.44351
chr10	92508626	92509344	-	ENSG00000148680	8.88702
chr10	92616887	92617301	-	ENSG00000148680	2.33869
chr10	93389623	93390680	-	ENSG00000119938	12.3271
chr10	93667564	93668241	-	ENSG00000174721	13.2415
chr10	93999642	94000085	-	ENSG00000107864	6.01884
chr10	94448353	94449377	+	ENSG00000152804	5.3812
chr10	94454350	94454764	+	ENSG00000152804	2.08185
chr10	95462083	95462288	-	ENSG00000148690	1.95027
chr10	96006030	96006348	+	ENSG00000138193	3.97577
chr10	96161961	96163339	+	ENSG00000108239	11.1845
chr10	96290901	96291312	+	ENSG00000108239	4.34001
chr10	97073498	97073871	-	ENSG00000095637	5.42376
chr10	97423195	97424092	-	ENSG00000119977	6.18301
chr10	97626148	97626663	+	ENSG00000138185	3.63093
chr10	97627214	97627601	+	ENSG00000138185	2.70261
chr10	98714603	98716213	+	ENSG00000196233	11.4033
chr10	98740690	98743800	+	ENSG00000155640	3.59702
chr10	98744229	98745413	+	ENSG00000155640	13.9131
chr10	99092838	99093966	-	ENSG00000181274	29.2396
chr10	99116477	99117025	-	ENSG00000052749	10.5506
chr10	99216463	99217055	+	ENSG00000171307	12.7649
chr10	99329924	99330586	+	ENSG00000165886	13.5935
chr10	99374451	99374674	-	ENSG00000171160	2.96483
chr10	99375752	99376144	-	ENSG00000171160	5.01767
chr10	99437307	99437755	-	ENSG00000119986	4.56543
chr10	99446765	99446972	-	ENSG00000119986	2.00698
chr10	99519151	99519730	+	ENSG00000155256	5.69977
chr10	99967860	99968636	+	ENSG00000166024	13.9489
chr10	99969149	99969591	+	ENSG00000166024	6.79341
chr10	100007748	100007980	-	ENSG00000138131	2.57726
chr10	100176057	100176473	-	ENSG00000107521	5.2194
chr10	101157006	101157460	-	ENSG00000120053	3.84419
chr10	101292732	101293217	+	ENSG00000119919	3.97577
chr10	101370421	101371262	-	ENSG00000155287	19.3107
chr10	101464235	101464949	+	ENSG00000198018	14.0146
chr10	101515387	101515754	+	ENSG00000119929	3.08732
chr10	101636403	101637171	-	ENSG00000107554	8.34963
chr10	101639433	101640037	-	ENSG00000107554	4.13653
chr10	101714955	101716938	-	ENSG00000107554	11.2299
chr10	102246518	102246982	-	ENSG00000075826	4.07746
chr10	102307777	102308133	+	ENSG00000166135	6.47236
chr10	102676682	102677022	+	ENSG00000119906	3.76412
chr10	102683734	102684534	+	ENSG00000119906	4.88786
chr10	102732358	102732683	+	ENSG00000095539	3.6113
chr10	102763328	102764084	+	ENSG00000107816	2.207
chr10	102766252	102767286	+	ENSG00000107816	10.7551
chr10	102778701	102778925	-	ENSG00000186862	2.57256
chr10	102896533	102896908	+	ENSG00000107807	8.65315
chr10	103312798	103313436	+	ENSG00000166167	12.374
chr10	103313642	103313858	+	ENSG00000166167	2.22267
chr10	103454272	103455090	-	ENSG00000107829	27.269
chr10	103546029	103546235	-	ENSG00000198408	1.33166
chr10	103558600	103559243	-	ENSG00000198408	15.1461
chr10	103577569	103578176	-	ENSG00000198408	11.6987
chr10	103607099	103607370	-	ENSG00000120029	2.91731
chr10	103825532	103827790	+	ENSG00000166189	36.3612
chr10	103874368	103874649	-	ENSG00000198728	1.37239
chr10	103898989	103900844	+	ENSG00000148840	21.5117
chr10	103901137	103901680	+	ENSG00000148840	3.72275
chr10	103906453	103907120	+	ENSG00000148840	17.0575
chr10	104142219	104142422	+	ENSG00000107862	1.92439
chr10	104240191	104240906	-	ENSG00000138107	10.0266
chr10	104389678	104390576	+	ENSG00000107882	22.7917
chr10	104391318	104392092	+	ENSG00000107882	7.79565
chr10	104416778	104417192	+	ENSG00000171206	3.8313
chr10	104572414	104573648	+	ENSG00000166272	11.8602
chr10	104573852	104574148	+	ENSG00000166272	2.15045
chr10	104574308	104575962	+	ENSG00000166272	9.64144
chr10	104678310	104678746	+	ENSG00000148842	5.66554
chr10	104679030	104680029	+	ENSG00000148842	22.0085
chr10	104836627	104838263	+	ENSG00000148842	25.4622
chr10	104849254	104849634	-	ENSG00000076685	2.15531
chr10	105127748	105128178	+	ENSG00000148835	4.57146
chr10	105147817	105148226	+	ENSG00000148835	4.57834
chr10	105184715	105185306	+	ENSG00000148843	12.8602
chr10	105372476	105372877	-	ENSG00000107957	7.22261
chr10	105726963	105727185	+	ENSG00000065613	3.94991
chr10	105762002	105763369	+	ENSG00000065613	2.85883
chr10	106072956	106075795	-	ENSG00000148841	18.8266
chr10	106214228	106214532	+	ENSG00000120051	3.0403
chr10	112266724	112267071	+	ENSG00000138166	2.91948
chr10	112269786	112271170	+	ENSG00000138166	22.0991
chr10	112723895	112724867	+	ENSG00000108061	19.8083
chr10	112837585	112837987	+	ENSG00000150594	2.80643
chr10	112838884	112839473	+	ENSG00000150594	4.67738
chr10	113912812	113913395	-	ENSG00000119927	8.19696
chr10	114206295	114206664	-	ENSG00000023041	6.68041
chr10	114710013	114710238	+	ENSG00000148737	3.05478
chr10	115489855	115490314	+	ENSG00000165806	8.11717
chr10	115608805	115609336	-	ENSG00000198924	7.94452
chr10	115609773	115610464	-	ENSG00000198924	5.98345
chr10	115612468	115612990	-	ENSG00000198924	9.99393
chr10	115613180	115613943	-	ENSG00000198924	7.44652
chr10	115636281	115636722	+	ENSG00000196865	8.14891
chr10	115805194	115805440	+	ENSG00000043591	3.97577
chr10	115922419	115923215	-	ENSG00000165813	13.0291
chr10	116195392	116196119	-	ENSG00000099204	2.95838
chr10	116621062	116621655	+	ENSG00000151553	4.67272
chr10	118434287	118434486	-	ENSG00000165868	2.33869
chr10	118645822	118646146	-	ENSG00000187164	3.74514
chr10	118764858	118765291	-	ENSG00000187164	2.58434
chr10	119042620	119044919	-	ENSG00000165650	11.0924
chr10	119798374	119799099	-	ENSG00000107560	12.2972
chr10	119799464	119800170	-	ENSG00000107560	9.06384
chr10	119805138	119805541	-	ENSG00000107560	3.16175
chr10	120514038	120514455	-	ENSG00000151893	3.67273
chr10	120801356	120802436	-	ENSG00000107581	13.6205
chr10	120895925	120896537	+	ENSG00000119979	2.56289
chr10	120967231	120967498	+	ENSG00000198873	2.25755
chr10	121214377	121215003	+	ENSG00000198873	3.53779
chr10	121334986	121335450	-	ENSG00000151923	3.11535
chr10	121586232	121587234	+	ENSG00000198825	5.44844
chr10	121657791	121658319	+	ENSG00000107651	8.63229
chr10	122348847	122349300	+	ENSG00000203805	3.55928
chr10	122357628	122358485	+	ENSG00000177234	7.69343
chr10	123969953	123971229	+	ENSG00000138162	29.41
chr10	124188987	124189607	+	ENSG00000107679	22.6165
chr10	124214128	124214481	+	ENSG00000254636	4.20964
chr10	124273611	124274298	+	ENSG00000166033	7.64931
chr10	124691847	124692274	-	ENSG00000119965	14.2475
chr10	124697049	124697802	-	ENSG00000119965	11.0613
chr10	124753448	124754203	-	ENSG00000095574	17.7452
chr10	124814684	124814883	+	ENSG00000196177	2.11917
chr10	124815637	124816224	+	ENSG00000196177	7.73735
chr10	124816402	124816739	+	ENSG00000196177	4.60435
chr10	125521260	125521636	-	ENSG00000121898	1.7004
chr10	125767738	125769818	-	ENSG00000182022	13.7684
chr10	126370015	126370972	-	ENSG00000189319	18.8594
chr10	126370015	126370972	-	ENSG00000258539	18.8594
chr10	126448935	126449136	-	ENSG00000203791	1.69071
chr10	126631050	126632003	+	ENSG00000019995	19.0897
chr10	126673360	126673934	+	ENSG00000019995	7.52159
chr10	126677450	126678360	-	ENSG00000175029	22.1245
chr10	127525164	127525411	-	ENSG00000089876	3.28545
chr10	127548233	127548693	-	ENSG00000089876	7.39031
chr10	129881758	129882128	+	ENSG00000132334	2.77721
chr10	129896072	129897691	-	ENSG00000148773	22.5651
chr10	129899349	129900067	-	ENSG00000148773	6.99215
chr10	129900710	129907670	-	ENSG00000148773	9.37253
chr10	129911659	129911982	-	ENSG00000148773	1.32911
chr10	129913048	129914308	-	ENSG00000148773	13.33
chr10	129924369	129924630	-	ENSG00000148773	2.94786
chr10	131635790	131636354	-	ENSG00000108001	10.7062
chr10	133769105	133769877	+	ENSG00000175470	21.7167
chr10	134018670	134019178	+	ENSG00000151640	2.80123
chr10	134021151	134021626	-	ENSG00000165752	9.62368
chr10	134161392	134161885	+	ENSG00000148814	20.9875
chr10	134217993	134220565	+	ENSG00000171813	35.6012
chr10	134230370	134231051	+	ENSG00000171813	3.21685
chr10	134999617	135000271	+	ENSG00000171798	11.9273
chr10	135193589	135194160	+	ENSG00000148832	16.9139
chr10	135197286	135197659	+	ENSG00000148832	4.41382
chr10	135235647	135235985	-	ENSG00000203772	2.60953
chr11	207585	208666	+	ENSG00000177963	15.8018
chr11	209619	210097	+	ENSG00000177963	7.26453
chr11	214129	214938	+	ENSG00000177963	4.62397
chr11	215627	216780	-	ENSG00000142082	15.2987
chr11	218643	219038	-	ENSG00000142082	5.94545
chr11	294375	295689	+	ENSG00000142102	26.6119
chr11	376625	377512	+	ENSG00000182272	32.2739
chr11	491006	491376	+	ENSG00000174915	6.21033
chr11	532265	532739	-	ENSG00000174775	12.4796
chr11	554053	554345	+	ENSG00000161328	3.0403
chr11	562168	562681	+	ENSG00000099849	5.52025
chr11	607089	609565	+	ENSG00000070047	18.2387
chr11	611559	611996	+	ENSG00000070047	3.69226
chr11	644245	644757	-	ENSG00000177030	23.8685
chr11	695356	695555	-	ENSG00000177030	1.86581
chr11	787751	788284	-	ENSG00000184524	7.10458
chr11	799273	799521	-	ENSG00000177595	2.06675
chr11	831355	831951	+	ENSG00000177685	5.90827
chr11	1010554	1011610	+	ENSG00000183020	12.249
chr11	1297043	1297976	-	ENSG00000078902	2.59308
chr11	1298135	1298518	-	ENSG00000078902	7.02377
chr11	1482228	1482475	+	ENSG00000174672	2.57256
chr11	1578254	1579038	-	ENSG00000184545	16.0942
chr11	1605205	1606037	-	ENSG00000205869	10.2902
chr11	1606320	1606558	-	ENSG00000205869	3.27416
chr11	1618662	1619223	-	ENSG00000205867	9.12088
chr11	1756153	1756601	-	ENSG00000244242	6.55919
chr11	2152693	2153467	-	ENSG00000167244	5.64523
chr11	2909656	2909864	-	ENSG00000254827	2.80643
chr11	2950242	2950518	-	ENSG00000181649	1.85668
chr11	3109033	3109236	-	ENSG00000021762	1.82195
chr11	3686833	3687792	-	ENSG00000129749	21.5159
chr11	3688448	3688935	-	ENSG00000129749	3.00942
chr11	3697286	3697752	-	ENSG00000110713	2.72046
chr11	3848283	3849502	-	ENSG00000177105	15.0912
chr11	4112633	4112889	+	ENSG00000167323	3.39116
chr11	4159483	4159708	+	ENSG00000167325	1.51506
chr11	4621458	4622206	-	ENSG00000167333	9.69555
chr11	4626394	4626758	-	ENSG00000167333	6.09987
chr11	5653488	5653950	+	ENSG00000258588	3.38429
chr11	5653488	5653950	+	ENSG00000258659	3.38429
chr11	5699387	5699802	-	ENSG00000132256	1.25487
chr11	5700967	5701469	-	ENSG00000132256	2.63669
chr11	5717509	5718039	+	ENSG00000132274	2.80523
chr11	6232670	6232962	-	ENSG00000051009	4.18249
chr11	6238579	6239391	-	ENSG00000051009	24.3152
chr11	6245009	6245441	-	ENSG00000051009	1.70921
chr11	6411737	6412312	+	ENSG00000166311	3.17165
chr11	6412620	6413299	+	ENSG00000166311	15.011
chr11	6415930	6416163	+	ENSG00000166311	2.93405
chr11	6431730	6432645	-	ENSG00000166313	10.7724
chr11	6469887	6470541	-	ENSG00000110171	6.89686
chr11	6477594	6478567	-	ENSG00000110171	6.85651
chr11	6497840	6498553	-	ENSG00000132254	3.99362
chr11	6555172	6555545	+	ENSG00000179532	3.0403
chr11	6566767	6567010	+	ENSG00000179532	2.00049
chr11	6568155	6568527	+	ENSG00000179532	3.34385
chr11	6568668	6568941	+	ENSG00000179532	3.10882
chr11	6578086	6579041	+	ENSG00000179532	6.54833
chr11	6585240	6586070	+	ENSG00000179532	3.50803
chr11	6587119	6587318	+	ENSG00000179532	1.87095
chr11	6587671	6588624	+	ENSG00000179532	5.37898
chr11	6591978	6592563	+	ENSG00000179532	5.84672
chr11	6642603	6646021	-	ENSG00000166341	18.3941
chr11	6647854	6648905	-	ENSG00000166341	9.12128
chr11	6651069	6652312	-	ENSG00000166341	9.03476
chr11	6653445	6654740	-	ENSG00000166341	6.03757
chr11	6661008	6662943	-	ENSG00000166341	34.8782
chr11	6676599	6677054	-	ENSG00000166341	6.08059
chr11	6703206	6703589	-	ENSG00000158042	6.22304
chr11	6953501	6953854	+	ENSG00000149054	4.67738
chr11	6976863	6977963	+	ENSG00000149054	7.59691
chr11	7021528	7022801	-	ENSG00000149050	7.24993
chr11	7063884	7064157	+	ENSG00000158077	3.97577
chr11	7674176	7674928	+	ENSG00000166387	14.044
chr11	8021740	8022045	+	ENSG00000175390	5.62886
chr11	8661778	8662045	-	ENSG00000166436	4.76632
chr11	8710252	8710677	+	ENSG00000166441	3.14713
chr11	8751672	8752640	-	ENSG00000166444	10.9269
chr11	8969671	8969909	-	ENSG00000175348	2.84442
chr11	9225219	9225852	-	ENSG00000184014	11.887
chr11	9302231	9302556	-	ENSG00000166471	6.77016
chr11	9466651	9467083	+	ENSG00000205339	4.45031
chr11	9771270	9771801	+	ENSG00000133789	1.94763
chr11	9800919	9801848	-	ENSG00000133812	6.9394
chr11	10527206	10527451	+	ENSG00000133805	2.33869
chr11	10580171	10580814	-	ENSG00000133800	3.32214
chr11	10597576	10598016	-	ENSG00000072952	7.95154
chr11	10800139	10800605	+	ENSG00000198730	5.06456
chr11	11963833	11964695	+	ENSG00000170242	19.992
chr11	11977517	11978351	+	ENSG00000170242	11.0914
chr11	11984766	11985099	-	ENSG00000050165	4.01616
chr11	12183629	12183963	+	ENSG00000133816	1.46726
chr11	12315149	12316399	+	ENSG00000133808	13.8433
chr11	12379752	12380549	+	ENSG00000133808	11.3237
chr11	12696020	12696543	+	ENSG00000187079	8.33781
chr11	12963867	12964207	+	ENSG00000187079	3.51923
chr11	13410312	13410658	-	ENSG00000148925	3.40847
chr11	14665256	14666377	+	ENSG00000152270	13.2097
chr11	14890964	14891618	+	ENSG00000152270	11.292
chr11	14912334	14913660	-	ENSG00000186104	24.2921
chr11	15994160	15994477	-	ENSG00000110693	2.33869
chr11	16838523	16839022	-	ENSG00000166689	7.02198
chr11	16847546	16848163	-	ENSG00000166689	26.1933
chr11	17111116	17111379	-	ENSG00000011405	2.18937
chr11	17190367	17191391	-	ENSG00000011405	6.80052
chr11	17393906	17394140	+	ENSG00000188211	2.00725
chr11	17809716	17809931	-	ENSG00000129158	2.64137
chr11	18312976	18313611	-	ENSG00000110756	4.45674
chr11	18387361	18387784	+	ENSG00000110768	6.06386
chr11	18636286	18637026	-	ENSG00000179119	3.60366
chr11	19250692	19251412	-	ENSG00000129173	6.20389
chr11	19954686	19955813	+	ENSG00000166833	16.7162
chr11	20066518	20067085	+	ENSG00000166833	3.64036
chr11	20139651	20140461	+	ENSG00000166833	28.2073
chr11	20140826	20141445	+	ENSG00000166833	6.09034
chr11	22301367	22302030	+	ENSG00000171714	6.4201
chr11	22646157	22647288	-	ENSG00000183161	10.9281
chr11	27389300	27390119	-	ENSG00000205213	15.1254
chr11	27494013	27494329	-	ENSG00000205213	14.0321
chr11	27677497	27678328	-	ENSG00000176697	4.745
chr11	27679218	27680267	-	ENSG00000176697	34.8225
chr11	28057678	28058252	-	ENSG00000121621	12.3047
chr11	30352342	30352913	+	ENSG00000152219	9.2001
chr11	32874817	32875712	+	ENSG00000135378	7.95154
chr11	32953168	32953704	+	ENSG00000060749	10.7495
chr11	32954923	32955454	+	ENSG00000060749	7.81183
chr11	32955814	32956037	+	ENSG00000060749	1.95488
chr11	32956271	32957077	+	ENSG00000060749	14.4758
chr11	32975215	32975808	+	ENSG00000060749	7.98829
chr11	33279205	33279599	+	ENSG00000110422	3.29322
chr11	33307834	33308879	+	ENSG00000110422	6.18556
chr11	33374669	33375015	+	ENSG00000110422	2.60104
chr11	33563338	33566049	+	ENSG00000110427	16.03
chr11	33566314	33566831	+	ENSG00000110427	17.3602
chr11	33689374	33690448	+	ENSG00000110427	14.5906
chr11	33690598	33691478	+	ENSG00000110427	12.0944
chr11	33692182	33692528	+	ENSG00000110427	2.66806
chr11	33693867	33694336	+	ENSG00000110427	7.05708
chr11	33880484	33881155	-	ENSG00000135363	4.8384
chr11	33891093	33891443	-	ENSG00000135363	2.38259
chr11	34167538	34168047	+	ENSG00000135372	4.38648
chr11	34378877	34379527	-	ENSG00000166016	6.08059
chr11	35250674	35250931	+	ENSG00000026508	3.55223
chr11	35453643	35454188	-	ENSG00000149090	3.21005
chr11	35684459	35685251	+	ENSG00000166326	5.30081
chr11	36483820	36484532	+	ENSG00000135362	16.1369
chr11	36511233	36512227	-	ENSG00000175104	13.6334
chr11	36595271	36595768	+	ENSG00000166349	3.50803
chr11	36596121	36597920	+	ENSG00000166349	11.837
chr11	40135805	40137817	-	ENSG00000148948	11.2352
chr11	43902530	43902916	+	ENSG00000166199	2.74572
chr11	44087702	44087952	+	ENSG00000110455	2.00628
chr11	44105248	44105533	+	ENSG00000110455	1.63098
chr11	44129355	44129825	+	ENSG00000151348	7.7397
chr11	44265712	44266385	+	ENSG00000151348	6.64796
chr11	44640627	44641049	+	ENSG00000085117	2.17505
chr11	44950564	44952134	+	ENSG00000157570	13.1023
chr11	44952721	44953016	+	ENSG00000157570	1.43415
chr11	45245880	45246412	+	ENSG00000019485	3.97577
chr11	45670752	45673026	-	ENSG00000175264	25.4624
chr11	45924108	45924917	+	ENSG00000121653	4.5436
chr11	45927514	45927975	+	ENSG00000121653	4.06771
chr11	45931193	45931835	-	ENSG00000121680	17.5642
chr11	45955128	45955840	-	ENSG00000135365	23.4537
chr11	46342456	46342663	+	ENSG00000157613	2.14115
chr11	46418142	46419493	-	ENSG00000110497	16.9493
chr11	46563496	46564897	-	ENSG00000110497	10.503
chr11	46636984	46637967	-	ENSG00000180423	11.6344
chr11	46693865	46695081	+	ENSG00000175224	3.18759
chr11	46699971	46700577	-	ENSG00000175220	2.25029
chr11	46722282	46722491	+	ENSG00000175213	2.42434
chr11	46725973	46727454	+	ENSG00000175213	13.3094
chr11	46879866	46880846	-	ENSG00000134569	15.6975
chr11	47183045	47183714	+	ENSG00000149179	9.96131
chr11	47199096	47199529	-	ENSG00000165912	6.04116
chr11	47260281	47261757	-	ENSG00000134575	20.593
chr11	47290150	47290374	+	ENSG00000025434	2.67597
chr11	47296150	47296597	+	ENSG00000110514	4.80923
chr11	47592930	47593401	+	ENSG00000213619	4.67821
chr11	47594585	47595395	-	ENSG00000123444	13.0942
chr11	47599018	47599655	-	ENSG00000123444	9.72749
chr11	47600292	47600496	-	ENSG00000123444	3.1725
chr11	47611275	47611634	-	ENSG00000172247	1.57672
chr11	47800412	47800817	-	ENSG00000030066	4.5297
chr11	57003816	57004404	-	ENSG00000134817	2.10482
chr11	57075866	57078056	-	ENSG00000149115	43.748
chr11	57079850	57081226	-	ENSG00000149115	23.2022
chr11	57087797	57088199	-	ENSG00000149115	3.32226
chr11	57174514	57175349	-	ENSG00000134802	7.2744
chr11	57243649	57244529	+	ENSG00000186907	9.13651
chr11	57252253	57252696	-	ENSG00000149150	13.4058
chr11	57319565	57319996	-	ENSG00000156587	2.72625
chr11	57426963	57427719	+	ENSG00000172409	5.09364
chr11	57428161	57429254	+	ENSG00000172409	19.8033
chr11	57435321	57435850	+	ENSG00000156599	10.7581
chr11	57439362	57440187	+	ENSG00000156599	11.1983
chr11	57466171	57467009	+	ENSG00000156599	4.00787
chr11	57467224	57467844	+	ENSG00000156599	15.4982
chr11	57563758	57564594	+	ENSG00000198561	12.5259
chr11	57569070	57569679	+	ENSG00000198561	4.97815
chr11	57583757	57583993	+	ENSG00000198561	1.381
chr11	57584160	57584461	+	ENSG00000198561	1.94452
chr11	58346627	58346911	+	ENSG00000186660	4.37181
chr11	58346627	58346911	+	ENSG00000255073	4.37181
chr11	58384677	58385480	+	ENSG00000186660	22.336
chr11	58891717	58893516	+	ENSG00000189057	6.71772
chr11	58893738	58894869	+	ENSG00000189057	23.1733
chr11	58919141	58920950	+	ENSG00000166801	11.3293
chr11	59343234	59343441	-	ENSG00000110048	1.44712
chr11	59573719	59574256	-	ENSG00000166902	9.20924
chr11	60658261	60658507	-	ENSG00000110107	4.56544
chr11	60703506	60704615	+	ENSG00000006118	11.9897
chr11	61025813	61026798	-	ENSG00000167992	13.5028
chr11	61165722	61166151	+	ENSG00000187049	7.85105
chr11	61170478	61171131	-	ENSG00000149532	13.7233
chr11	61171926	61172309	-	ENSG00000149532	4.09476
chr11	61213324	61213952	+	ENSG00000167985	14.2699
chr11	61511001	61512246	+	ENSG00000134780	24.7528
chr11	61562806	61564573	+	ENSG00000168496	17.6974
chr11	61664818	61665881	-	ENSG00000167994	7.24743
chr11	61897221	61898101	+	ENSG00000149503	6.13485
chr11	61919062	61919480	+	ENSG00000149503	2.38819
chr11	62159942	62160529	+	ENSG00000162174	7.85708
chr11	62345930	62346553	-	ENSG00000149016	4.65879
chr11	62345930	62346553	-	ENSG00000255508	4.65879
chr11	62382848	62383233	-	ENSG00000149541	4.65402
chr11	62414530	62417459	-	ENSG00000185085	19.8511
chr11	62430416	62430778	-	ENSG00000162194	2.05746
chr11	62433136	62434995	+	ENSG00000214756	4.5772
chr11	62482244	62482542	-	ENSG00000214753	6.51838
chr11	62493954	62494986	-	ENSG00000214753	11.6911
chr11	62493954	62494986	-	ENSG00000234857	11.6911
chr11	62553641	62554818	+	ENSG00000162227	9.10398
chr11	62655810	62656302	+	ENSG00000168003	8.83807
chr11	63486223	63488482	+	ENSG00000133318	9.49158
chr11	63676293	63676912	+	ENSG00000072518	12.2256
chr11	63721858	63722840	+	ENSG00000110583	18.3033
chr11	63993819	63994669	+	ENSG00000149761	3.49024
chr11	64005772	64006248	+	ENSG00000173511	7.81805
chr11	64083210	64083630	+	ENSG00000173153	3.01448
chr11	64533317	64533600	-	ENSG00000168066	2.86459
chr11	64571598	64572543	-	ENSG00000133895	7.23798
chr11	64621165	64622337	-	ENSG00000110047	24.1487
chr11	64811696	64812301	+	ENSG00000168061	50.4319
chr11	64878880	64879087	+	ENSG00000149823	4.13116
chr11	64883897	64884350	-	ENSG00000174276	4.29003
chr11	64895235	64895584	-	ENSG00000162298	3.93286
chr11	64978856	64979449	+	ENSG00000014216	6.30311
chr11	65064689	65065034	+	ENSG00000014138	5.40888
chr11	65142704	65143063	-	ENSG00000162241	4.92662
chr11	65143806	65144372	-	ENSG00000162241	2.77927
chr11	65178534	65180203	+	ENSG00000126391	12.4166
chr11	65340861	65341471	+	ENSG00000176973	5.00197
chr11	65349115	65349498	+	ENSG00000173442	2.36205
chr11	65365240	65366157	-	ENSG00000173327	21.7979
chr11	65385438	65387241	+	ENSG00000197136	39.2098
chr11	65408286	65409061	+	ENSG00000213445	13.7963
chr11	65486205	65486936	-	ENSG00000172922	6.16057
chr11	65544936	65547541	-	ENSG00000254470	33.8465
chr11	65554660	65554864	+	ENSG00000172818	2.80643
chr11	65562592	65563145	+	ENSG00000172818	5.14511
chr11	65684367	65685788	-	ENSG00000175573	22.4184
chr11	65765823	65766247	-	ENSG00000175376	9.5823
chr11	66062361	66062562	+	ENSG00000179292	2.57256
chr11	66099650	66100042	-	ENSG00000174791	4.81791
chr11	66102120	66102635	-	ENSG00000174791	9.19501
chr11	66113043	66113728	-	ENSG00000174684	14.5795
chr11	66114010	66114932	-	ENSG00000174684	9.43197
chr11	66130420	66131165	-	ENSG00000174669	3.97577
chr11	66243098	66244033	+	ENSG00000174516	14.0333
chr11	66244387	66244624	+	ENSG00000174516	2.04121
chr11	66334792	66335081	-	ENSG00000174080	2.16198
chr11	66357683	66358601	-	ENSG00000182791	4.44351
chr11	66358831	66359106	-	ENSG00000182791	4.67738
chr11	66384145	66384693	+	ENSG00000239306	4.89404
chr11	66384145	66384693	+	ENSG00000248643	4.89404
chr11	66391526	66392156	+	ENSG00000239306	7.40038
chr11	66407191	66407903	+	ENSG00000173933	4.81197
chr11	66410761	66411344	+	ENSG00000173933	5.42637
chr11	66410761	66411344	+	ENSG00000248643	5.42637
chr11	66435943	66436888	-	ENSG00000173914	27.2223
chr11	66453040	66453408	-	ENSG00000173898	8.10297
chr11	66458780	66459301	-	ENSG00000173898	7.35041
chr11	66459847	66460193	-	ENSG00000173898	5.00766
chr11	66467908	66468756	-	ENSG00000173898	17.5179
chr11	66472005	66472609	-	ENSG00000173898	4.84937
chr11	66613433	66613819	+	ENSG00000173653	2.45686
chr11	66616197	66616681	-	ENSG00000173599	4.57331
chr11	66624707	66626711	+	ENSG00000173621	32.9162
chr11	66839141	66839395	+	ENSG00000173156	3.11949
chr11	66886768	66887028	+	ENSG00000173120	8.27235
chr11	66998902	66999425	+	ENSG00000173120	7.94076
chr11	67022345	67022610	+	ENSG00000173120	2.24404
chr11	67024450	67025049	+	ENSG00000173120	3.22504
chr11	67069548	67069943	+	ENSG00000172932	8.39152
chr11	67119017	67119341	-	ENSG00000175482	7.63097
chr11	67132530	67133284	-	ENSG00000175505	17.7915
chr11	67165015	67165413	+	ENSG00000172613	4.13444
chr11	67203097	67203634	-	ENSG00000213402	3.31846
chr11	67259399	67259783	-	ENSG00000110697	4.68439
chr11	67275733	67276060	-	ENSG00000167797	1.90225
chr11	67820420	67821523	-	ENSG00000110721	3.60275
chr11	68115276	68115858	+	ENSG00000162337	9.43388
chr11	68153678	68154294	+	ENSG00000162337	5.33426
chr11	68181078	68181475	+	ENSG00000162337	5.57823
chr11	68216202	68216551	+	ENSG00000162337	4.96822
chr11	68703652	68704521	+	ENSG00000132740	9.01537
chr11	68707073	68707907	+	ENSG00000132740	11.3273
chr11	68855316	68855897	+	ENSG00000162341	7.93682
chr11	69182030	69182569	+	ENSG00000172927	3.50803
chr11	69465886	69466157	+	ENSG00000110092	1.84713
chr11	70049469	70050027	+	ENSG00000168040	3.47499
chr11	70052199	70053399	+	ENSG00000168040	17.7911
chr11	70229791	70229995	+	ENSG00000131626	2.0031
chr11	70281513	70281787	+	ENSG00000085733	2.47675
chr11	71145629	71146678	-	ENSG00000172893	2.31776
chr11	71507099	71508191	+	ENSG00000158483	5.01785
chr11	71707120	71708269	+	ENSG00000137522	15.4573
chr11	71723941	71727502	-	ENSG00000137497	23.2436
chr11	72145185	72145521	-	ENSG00000162129	7.29626
chr11	72465794	72466183	-	ENSG00000214530	6.76595
chr11	72548550	72549936	-	ENSG00000137478	6.75813
chr11	72945838	72947026	+	ENSG00000175591	13.3305
chr11	73008457	73008767	+	ENSG00000171631	3.97577
chr11	73018722	73022893	+	ENSG00000110237	25.3655
chr11	73078475	73079394	+	ENSG00000110237	19.7467
chr11	73113588	73114093	-	ENSG00000054965	5.64163
chr11	73115887	73116648	-	ENSG00000054965	13.1713
chr11	73583882	73584526	-	ENSG00000181924	8.24629
chr11	73638396	73638762	+	ENSG00000175575	10.3494
chr11	73711394	73712510	-	ENSG00000175564	7.24993
chr11	73720230	73720538	-	ENSG00000175564	5.84672
chr11	73744290	73745363	-	ENSG00000168014	8.16997
chr11	73789056	73789629	-	ENSG00000168014	1.64731
chr11	74203016	74203397	-	ENSG00000175536	5.44684
chr11	74459897	74460177	+	ENSG00000166439	7.82449
chr11	74546631	74547873	+	ENSG00000166439	12.5124
chr11	74553081	74553450	+	ENSG00000166439	12.8763
chr11	74553081	74553450	-	ENSG00000166435	12.8763
chr11	74716382	74718459	+	ENSG00000162139	31.2715
chr11	74976251	74977417	-	ENSG00000137486	33.8475
chr11	75145706	75146556	-	ENSG00000158555	4.30663
chr11	75277370	75277883	+	ENSG00000149257	1.70423
chr11	75282805	75283797	+	ENSG00000149257	2.67029
chr11	75851665	75852702	+	ENSG00000198382	21.6249
chr11	75897870	75898111	-	ENSG00000085741	2.80643
chr11	76255232	76255925	+	ENSG00000158636	10.1931
chr11	76256691	76257521	+	ENSG00000158636	3.94078
chr11	76260946	76261593	+	ENSG00000158636	19.6046
chr11	76370152	76372461	-	ENSG00000137507	29.1442
chr11	76731295	76731494	+	ENSG00000078124	1.22249
chr11	77034003	77034440	-	ENSG00000149269	6.74101
chr11	77377848	77378629	-	ENSG00000048649	37.9162
chr11	77411689	77412439	-	ENSG00000048649	3.31811
chr11	77412874	77413156	-	ENSG00000048649	1.78112
chr11	77727628	77727827	-	ENSG00000151364	2.33869
chr11	77920486	77921911	+	ENSG00000118369	13.7949
chr11	77929073	77930390	-	ENSG00000033327	11.425
chr11	77937552	77938106	-	ENSG00000033327	5.36987
chr11	78369083	78369716	-	ENSG00000149256	10.2902
chr11	78380203	78380585	-	ENSG00000149256	3.50803
chr11	78381147	78381443	-	ENSG00000149256	2.57256
chr11	78412583	78413246	-	ENSG00000149256	3.27416
chr11	82443325	82444065	-	ENSG00000182103	7.71767
chr11	82692658	82693551	-	ENSG00000137502	24.6323
chr11	82868193	82868661	+	ENSG00000165494	11.7582
chr11	82876690	82877626	+	ENSG00000165494	8.60441
chr11	82879412	82880039	+	ENSG00000165494	10.9707
chr11	82880296	82881056	+	ENSG00000165494	17.1585
chr11	82904903	82905690	+	ENSG00000137494	8.99871
chr11	82997089	82997368	-	ENSG00000137500	3.6731
chr11	85371226	85371547	-	ENSG00000137504	2.356
chr11	85405954	85406279	-	ENSG00000137501	2.20691
chr11	85468960	85469159	-	ENSG00000137501	2.33869
chr11	85779832	85780126	-	ENSG00000073921	6.25784
chr11	86656887	86657098	-	ENSG00000174804	2.02844
chr11	86661825	86663762	-	ENSG00000174804	12.42
chr11	86661825	86663762	+	ENSG00000150687	12.42
chr11	88026929	88027619	-	ENSG00000109861	11.2662
chr11	92085128	92086179	+	ENSG00000165323	3.3866
chr11	92086395	92086663	+	ENSG00000165323	3.50803
chr11	92086861	92087187	+	ENSG00000165323	2.33869
chr11	92087327	92088540	+	ENSG00000165323	8.18541
chr11	92530999	92531356	+	ENSG00000165323	2.57256
chr11	92531557	92533077	+	ENSG00000165323	9.35475
chr11	92533563	92533906	+	ENSG00000165323	4.01346
chr11	92534330	92535033	+	ENSG00000165323	6.27147
chr11	92564967	92565166	+	ENSG00000165323	2.57256
chr11	92577234	92577810	+	ENSG00000165323	11.575
chr11	92599880	92600590	+	ENSG00000165323	13.8786
chr11	92616094	92616572	+	ENSG00000165323	3.84587
chr11	92623551	92624475	+	ENSG00000165323	48.7921
chr11	93429949	93430446	+	ENSG00000166004	3.16006
chr11	93430979	93431773	+	ENSG00000166004	2.53121
chr11	93432979	93433302	+	ENSG00000166004	2.23047
chr11	93460292	93460761	+	ENSG00000166004	7.45671
chr11	93862092	93862353	+	ENSG00000110218	4.718
chr11	93912795	93913593	+	ENSG00000110218	4.99996
chr11	93913793	93915162	+	ENSG00000110218	20.3662
chr11	94111228	94111487	-	ENSG00000123901	3.07886
chr11	94277801	94279819	+	ENSG00000196371	31.5938
chr11	94282419	94282765	+	ENSG00000196371	5.01724
chr11	94532486	94533436	+	ENSG00000166025	14.8563
chr11	94603678	94604320	+	ENSG00000166025	20.8934
chr11	94730242	94732511	+	ENSG00000186280	14.3318
chr11	94823150	94823571	+	ENSG00000149218	5.43995
chr11	94861491	94862870	+	ENSG00000149218	21.365
chr11	94865170	94865827	+	ENSG00000149218	12.6339
chr11	95711766	95713064	-	ENSG00000184384	16.664
chr11	95825857	95826846	-	ENSG00000184384	20.1307
chr11	96074366	96075288	-	ENSG00000184384	19.7139
chr11	96117014	96117912	-	ENSG00000149231	14.0449
chr11	101832707	101833019	+	ENSG00000110318	3.48454
chr11	101833264	101834714	+	ENSG00000110318	4.86305
chr11	101868238	101868681	+	ENSG00000110318	9.18466
chr11	101870993	101871318	+	ENSG00000110318	2.25862
chr11	102195142	102195978	+	ENSG00000023445	6.54833
chr11	102220453	102221600	+	ENSG00000110330	4.78723
chr11	102248119	102248493	+	ENSG00000110330	2.38468
chr11	103780316	103780539	-	ENSG00000170962	2.27498
chr11	104915168	104915377	-	ENSG00000204397	1.77239
chr11	105924318	105924789	-	ENSG00000182359	6.08059
chr11	106810251	106810664	-	ENSG00000152402	2.80643
chr11	107197363	107197759	-	ENSG00000152404	7.93874
chr11	107299714	107300225	-	ENSG00000152404	3.42674
chr11	107375293	107376028	-	ENSG00000137760	22.3265
chr11	107463491	107463860	+	ENSG00000268467	2.57256
chr11	107662997	107663471	-	ENSG00000110660	6.35055
chr11	107974895	107975373	+	ENSG00000166266	2.90441
chr11	108031514	108032394	-	ENSG00000149308	3.36079
chr11	108043018	108043616	-	ENSG00000149308	3.24922
chr11	108044092	108044657	-	ENSG00000149308	8.54904
chr11	108345313	108345737	-	ENSG00000178202	3.53208
chr11	108593764	108594277	+	ENSG00000178105	7.9987
chr11	110007448	110008147	+	ENSG00000149289	11.8753
chr11	110035065	110036507	+	ENSG00000149289	22.4082
chr11	110449902	110451297	-	ENSG00000137727	19.3373
chr11	110451554	110451999	-	ENSG00000137727	17.3032
chr11	111414772	111415076	+	ENSG00000204381	3.12197
chr11	111430866	111431322	+	ENSG00000204381	10.8154
chr11	111594330	111595891	+	ENSG00000170145	15.0105
chr11	111596848	111597504	+	ENSG00000170145	3.65279
chr11	111745807	111746729	-	ENSG00000255561	13.2277
chr11	111796724	111797059	+	ENSG00000254445	1.83993
chr11	111797223	111797570	+	ENSG00000254445	6.31446
chr11	111889681	111890700	+	ENSG00000150764	11.4831
chr11	111956007	111956288	-	ENSG00000150779	4.62292
chr11	111956686	111956996	-	ENSG00000150779	3.53467
chr11	113558653	113559026	-	ENSG00000166682	2.80643
chr11	113604012	113604367	-	ENSG00000086827	6.35769
chr11	114182873	114183225	+	ENSG00000166741	5.65169
chr11	114270781	114271135	-	ENSG00000180425	2.90206
chr11	114270781	114271135	+	ENSG00000076053	2.90206
chr11	114278162	114278678	+	ENSG00000076053	9.63587
chr11	116714151	116714844	-	ENSG00000160584	6.91013
chr11	116728425	116729380	-	ENSG00000160584	32.4394
chr11	117102944	117103245	-	ENSG00000160613	6.80687
chr11	117159652	117160478	-	ENSG00000186318	6.32277
chr11	117282617	117283302	+	ENSG00000110274	9.45237
chr11	117707858	117708342	-	ENSG00000137726	2.30054
chr11	117869504	117869757	+	ENSG00000110324	2.80643
chr11	118342437	118343136	+	ENSG00000118058	4.01515
chr11	118344318	118344905	+	ENSG00000118058	5.37128
chr11	118373096	118377236	+	ENSG00000118058	7.32505
chr11	118395859	118396262	+	ENSG00000118058	6.00125
chr11	118471489	118471693	+	ENSG00000095139	2.16049
chr11	118498014	118499490	+	ENSG00000019144	22.9624
chr11	118527347	118527828	+	ENSG00000019144	2.82313
chr11	118622275	118622875	-	ENSG00000110367	11.3501
chr11	118656823	118657313	-	ENSG00000110367	13.9359
chr11	118769203	118770336	-	ENSG00000186174	6.38465
chr11	118770518	118770945	-	ENSG00000186174	2.0078
chr11	118771229	118773705	-	ENSG00000186174	41.3795
chr11	118964599	118966041	-	ENSG00000188486	60.8998
chr11	118987051	118987260	+	ENSG00000172375	2.36809
chr11	119031650	119032073	+	ENSG00000172350	3.27416
chr11	119050276	119051089	+	ENSG00000160703	2.53572
chr11	119155879	119156255	+	ENSG00000110395	2.90008
chr11	119179424	119180648	-	ENSG00000076706	4.11363
chr11	119205260	119207516	+	ENSG00000173456	13.0425
chr11	119209695	119210556	-	ENSG00000223953	11.3865
chr11	119209695	119210556	-	ENSG00000259159	11.3865
chr11	119209695	119210556	-	ENSG00000235718	11.3865
chr11	119226881	119227644	-	ENSG00000036672	5.14511
chr11	119289566	119289770	-	ENSG00000154096	2.10482
chr11	120100033	120100556	+	ENSG00000184232	2.64667
chr11	120350568	120351182	+	ENSG00000196914	23.7142
chr11	120995932	120996659	+	ENSG00000109927	7.4838
chr11	120998343	120999124	+	ENSG00000109927	2.57256
chr11	121000455	121001101	+	ENSG00000109927	6.16353
chr11	121008076	121008619	+	ENSG00000109927	10.0314
chr11	121016318	121016993	+	ENSG00000109927	10.5241
chr11	122680456	122681113	+	ENSG00000154127	7.37215
chr11	122756428	122756880	+	ENSG00000109944	3.84713
chr11	122774629	122775193	+	ENSG00000109944	2.73232
chr11	122805232	122805793	+	ENSG00000109944	11.0345
chr11	122829993	122830255	+	ENSG00000109944	5.81821
chr11	122928221	122928499	-	ENSG00000109971	3.17917
chr11	123503050	123503312	-	ENSG00000166257	3.41068
chr11	123503715	123504541	-	ENSG00000166257	8.88702
chr11	123601056	123601680	-	ENSG00000166261	12.2839
chr11	124545146	124545439	+	ENSG00000064199	3.90246
chr11	124616534	124616988	+	ENSG00000154146	2.87668
chr11	124636731	124638059	-	ENSG00000120458	18.6638
chr11	124754219	124754530	-	ENSG00000154133	3.50474
chr11	124857187	124857993	+	ENSG00000149548	9.80237
chr11	124957918	124958496	+	ENSG00000134955	7.13593
chr11	125300990	125301979	+	ENSG00000165495	21.7498
chr11	125366938	125367137	+	ENSG00000255537	2.33869
chr11	125763441	125764275	-	ENSG00000110060	23.4515
chr11	125769316	125770106	+	ENSG00000198331	9.39014
chr11	125829848	125830195	-	ENSG00000064309	2.33365
chr11	125831465	125831829	-	ENSG00000064309	4.41382
chr11	125885040	125885248	-	ENSG00000064309	3.01047
chr11	126072723	126073577	-	ENSG00000165526	15.4014
[truncated: 8,582 more rows]
