# Supplementary material for: RNA N6-methyladenosine modulates endothelial atherogenic responses to disturbed flow in mice
Source: eLife. 2022 Jan 10;11:e69906. doi: 10.7554/eLife.69906 (PMC8794471; doi:10.7554/eLife.69906)
Supplement: Supplementary file 2. [file elife-69906-supp2.xlsx]

## Sheet: Sheet1
Supplemental Table 2. Identified candidate genes with decreased m6A and increased expression levels in response to OS
		ST					OS					Fold	RNA-seq			Input
GeneID	GeneName	Chr	Chr_start	Chr_stop	Strand	enrichment	Chr	Chr_start	Chr_stop	Strand	enrichment	OS/ST	log2FC	pvalue	qvalue	log2FC	pvalue	qvalue
ENSG00000008086	CDKL5	chrX	18622187	18622984	+	30.02	chrX	18622131	18622986	+	18.69	0.623	0.744161	0.000249954	0.000688444	0.736966	0.0129793	0.024318
ENSG00000023902	PLEKHO1	chr1	150122127	150122599	+	6.58	chr1	150122137	150122340	+	3.67	0.559	0.721584	6.33e-61	1.43e-59	0.98354	3.79e-59	6.75e-58
ENSG00000078687	TNRC6C	chr17	76027680	76028102	+	6.3	chr17	76027606	76028103	+	3.45	0.547	0.864591	1.87e-44	3.17e-43	1.0455	1.25e-35	1.46e-34
ENSG00000101670	LIPG	chr18	47116901	47117356	+	5.09	chr18	47116894	47117389	+	3.11	0.611	0.64043	3.8e-155	2.36e-153	3.14667	0	0
ENSG00000102984	ZNF821	chr16	71893627	71894519	-	40.34	chr16	71893622	71894542	-	26.4	0.655	0.858247	4.16e-11	2.17e-10	0.920076	3.08e-08	1.15e-07
ENSG00000112182	BACH2	chr6	90659874	90661582	-	11.57	chr6	90659826	90661523	-	6.43	0.556	0.60311	4.95e-05	0.000149843	0.791683	8.81e-08	3.15e-07
ENSG00000112183	RBM24	chr6	17292076	17292371	+	5.19	chr6	17292136	17292407	+	3.4	0.655	0.887323	3.21e-12	1.8e-11	0.698619	0.00137548	0.00304093
ENSG00000121933	ADORA3	chr1	112026022	112026455	-	5.9	chr1	112026017	112026454	-	3.86	0.655	1.078	0.00741889	0.0161364	1.08246	0.00174866	0.00380331
ENSG00000123066	MED13L	chr12	116398636	116399198	-	4.89	chr12	116398636	116399203	-	3.25	0.665	0.810078	3.63e-99	1.38e-97	1.49344	3.79e-260	2.78e-258
ENSG00000125657	TNFSF9	chr19	6534714	6535554	+	10.12	chr19	6535383	6535582	+	2.18	0.216	0.910203	8.32e-05	0.000244644	1.08092	0.00630213	0.012543
ENSG00000136010	ALDH1L2	chr12	105418036	105418361	-	4.56	chr12	105418054	105418292	-	2.87	0.628	1.48829	2.21e-29	2.61e-28	0.693897	0.0180128	0.03272
ENSG00000137809	ITGA11	chr15	68594474	68595468	-	17.41	chr15	68594314	68595488	-	8.29	0.476	0.89812	2.74e-10	1.35e-09	0.87669	9.94e-08	3.53e-07
ENSG00000141431	ASXL3	chr18	31318596	31318958	+	3.75	chr18	31318451	31319061	+	1.8	0.479	0.911773	1.86e-08	7.99e-08	0.96384	4.36e-06	1.32e-05
ENSG00000143367	TUFT1	chr1	151554177	151554665	+	5.44	chr1	151554117	151554675	+	3.51	0.646	0.754888	0.000197092	0.000552105	1.2863	1.3e-05	3.74e-05
ENSG00000144583	2021-03-04	chr2	217123332	217124578	-	19.88	chr2	217123278	217124485	-	10.68	0.537	1.53633	4.88e-77	1.42e-75	2.04617	1.05e-47	1.55e-46
ENSG00000145358	DDIT4L	chr4	101109018	101109362	-	4.12	chr4	101109032	101109374	-	2.65	0.642	2.09871	6.11e-112	2.62e-110	1.15528	1.84e-06	5.78e-06
ENSG00000146648	EGFR	chr7	55276289	55276527	+	2.94	chr7	55276287	55276500	+	1.74	0.593	1.37085	0	0	2.3801	1.28e-244	8.79e-243
ENSG00000155090	KLF10	chr8	103663179	103664202	-	8.72	chr8	103663184	103664201	-	4.13	0.474	0.605516	2.42e-43	4e-42	0.823596	4.59e-25	3.96e-24
ENSG00000156500	FAM122C	chrX	133972705	133973483	+	19.34	chrX	133972747	133973265	+	12.63	0.653	0.597674	0.000681296	0.00177581	0.678072	0.00363043	0.00753825
ENSG00000156650	KAT6B	chr10	76781806	76782099	+	3.34	chr10	76781780	76782104	+	1.98	0.594	0.753412	2.01e-19	1.66e-18	0.942905	4.73e-21	3.57e-20
ENSG00000164117	FBXO8	chr4	175204502	175204924	-	2.96	chr4	175204482	175204905	-	1.37	0.464	0.83247	6.43e-16	4.47e-15	0.699876	4.57e-05	0.000123284
ENSG00000168152	THAP9	chr4	83839135	83839643	+	10.81	chr4	83839293	83839678	+	3.6	0.333	0.629162	0.00337124	0.00785134	1.09954	0.000123292	0.000315703
ENSG00000169851	PCDH7	chr4	30723801	30726105	+	31.62	chr4	30723755	30726128	+	19.29	0.61	1.81403	4.07e-110	1.72e-108	2.12745	1.27e-86	3.21e-85
ENSG00000170396	ZNF804A	chr2	185463353	185463754	+	7.6	chr2	185463286	185463750	+	4.48	0.589	1.00922	3.16e-13	1.88e-12	1.32793	3.1e-12	1.55e-11
ENSG00000171451	DSEL	chr18	65182173	65182712	-	9.61	chr18	65182144	65182834	-	5.95	0.619	0.798021	3.82e-33	4.97e-32	1.8893	5.12e-54	8.45e-53
ENSG00000179909	ZNF154	chr19	58213649	58214160	-	16.59	chr19	58213681	58214144	-	7.34	0.442	0.711832	1.64e-13	9.93e-13	0.71843	0.000340412	0.000820409
ENSG00000182504	CEP97	chr3	101483660	101484297	+	18.03	chr3	101483594	101484365	+	11.52	0.639	0.702734	1.24e-15	8.47e-15	0.763257	1.05e-07	3.72e-07
ENSG00000183049	CAMK1D	chr10	12870697	12871191	+	38.42	chr10	12870675	12871247	+	21.73	0.566	0.904175	5.33e-20	4.52e-19	1.7097	3.75e-47	5.49e-46
ENSG00000185483	ROR1	chr1	64643048	64645285	+	28.39	chr1	64642998	64645238	+	17.17	0.605	1.60071	6.86e-135	3.56e-133	2.50064	1.99e-217	1.16e-215
ENSG00000196110	ZNF699	chr19	9405911	9407515	-	17.6	chr19	9405922	9407544	-	10.3	0.585	1.39046	1.63e-07	6.43e-07	1.28011	1.16e-05	3.38e-05
ENSG00000196275	GTF2IRD2	chr7	74211245	74212543	-	6.53	chr7	74211147	74212149	-	4.24	0.649	1.87447	1.18e-05	3.86e-05	0.840522	0.0133239	0.0248946
ENSG00000206432	TMEM200C	chr18	5891433	5892140	-	13.08	chr18	5891474	5892027	-	4.72	0.361	1.14166	8.03e-08	3.26e-07	2.46949	4.82e-10	2.06e-09
ENSG00000217128	FNIP1	chr5	130762590	130763112	-	20.31	chr5	130762679	130763100	-	12.22	0.602	0.656926	5.2e-33	6.74e-32	1.34473	6.37e-98	1.78e-96
ENSG00000223547	ZNF844	chr19	12186182	12187163	+	7.6	chr19	12186110	12186710	+	2.68	0.352	1.00827	5.45e-08	2.24e-07	1.51457	0.00139439	0.0030796
ENSG00000256087	ZNF432	chr19	52536389	52538708	-	32.57	chr19	52536461	52538712	-	19.9	0.611	0.587452	1.33e-05	4.32e-05	0.950048	5.95e-10	2.53e-09
