# Supplementary material for: RNA N6-methyladenosine modulates endothelial atherogenic responses to disturbed flow in mice
Source: eLife. 2022 Jan 10;11:e69906. doi: 10.7554/eLife.69906 (PMC8794471; doi:10.7554/eLife.69906)
Supplement: Supplementary file 3. [file elife-69906-supp3.xlsx]

## Sheet: primers for meRIP-qPCR
Pimers	Sequence (5'-3')
EGFR-3utr-F	CGCTGTGAGTCCAGGTTGT
EGFR-3utr-R	ACCAGTGCCTTTCCTGCTA

## Sheet: primers for qPCR
Pimers	Sequence (5'-3')
EGFR-F	TTGCCGCAAAGTGTGTAACG
EGFR-R	AGGGAACAGGAAATATGTCGAA
THBS1-F	TGTTTGCACACTGAATTGAAGA
THBS1-R	AGCCAGTAGAGAACAAATAAGCA
GAPDH-F	CTGGGCTACACTGAGCACC
GAPDH-R	AAGTGGTCGTTGAGGGCAATG
